# Supplementary material for: Seven-Up Is a Novel Regulator of Insulin Signaling
Source: Oxford University Press journal article supplement (doi:10.1534/genetics.118.300770), 2018-02-28
Supplement: tables1.xlsx [file tables1.xlsx]

## Sheet: HS-fed Svpi vs wild-type
ensembl_gene_id	external_gene_id	r4gal4_v60100_0_7m_1	r4gal4_v60100_0_7m_2	r4gal4_v60100_0_7m_3	r4gal4_svpi_0_7m_1	r4gal4_svpi_0_7m_3	r4gal4_svpi_0_7m_2	logFC	logCPM	PValue	FDR	FC Svpi/+
FBgn0030817	CG4991	468.92	477.91	601.45	28.409	29.319	17.749	-4.33885	5.56218	2.1191e-77	1.037e-73	-20.5133
FBgn0260780	wisp	860.28	376.53	678.22	48.456	27.213	22.463	-4.27885	5.87023	1.597e-37	9.194e-35	-19.5148
FBgn0034331	CG15067	358.56	316.39	208.8	6.459	4.6669	38.045	-4.1561	4.7718	1.7409e-17	1.9584e-15	-17.973
FBgn0032945	CG8665	503.14	612.3	628.08	43.556	19.088	53.895	-3.91193	5.75827	5.0557e-51	7.0686e-48	-14.9608
FBgn0037405	CG1077	31.322	151.4	1.1706	4.7196	6.9952	2.4726	-3.6624	2.60178	0.00018588	0.0024618	-12.9617
FBgn0085320	CG34291	1537.8	1268.3	1938.5	86.724	37.356	267.49	-3.58899	7.21865	7.3751e-13	4.7801e-11	-12.1169
FBgn0002562	Lsp1alpha	92321	125100	139520	8485.7	6355.2	18260	-3.43072	13.4617	2.2489e-23	4.3156e-21	-10.7834
FBgn0030187	Ipod	9.6637	9.7136	15.312	0.93994	0.83693	1.1613	-3.41303	0.50499	5.8126e-07	1.4366e-05	-11.8064
FBgn0039611	CG14528	674.97	660.91	781.52	28.032	26.54	144.71	-3.39404	6.07441	2.9445e-12	1.6952e-10	-10.6251
FBgn0038074	CG6188	3815.2	2039.2	2803	159.41	148.18	527.47	-3.37011	8.10294	2.1343e-15	1.7854e-13	-10.3674
FBgn0037386	CG1208	59.732	64.299	38.944	4.7112	5.1292	5.7745	-3.35717	2.45419	1.1382e-18	1.41e-16	-10.4371
FBgn0039454	CG14247	31.139	61.455	32.785	1.8418	1.5718	8.9025	-3.35246	2.10689	4.2174e-11	2.1498e-09	-10.1801
FBgn0052667	CG32667	365.01	208.17	350.83	9.1923	4.3787	78.695	-3.2864	4.89474	1.289e-06	2.8935e-05	-10.0146
FBgn0036353	CG10171	1079.4	655.95	1000.4	109.79	83.817	87.165	-3.28233	6.45183	2.0879e-43	1.8577e-40	-9.74367
FBgn0030394	Cpr11A	73.043	167.52	167.69	16.107	16.402	9.5364	-3.26008	3.73752	1.0683e-19	1.5375e-17	-9.70981
FBgn0031821	CG9542	223.2	147.82	299.6	15.935	18.605	39.821	-3.17486	4.4504	1.8045e-21	3.0984e-19	-9.01844
FBgn0040733	CG15068	117.51	156.83	92.149	7.4473	7.4064	26.996	-3.1385	3.60147	7.0103e-17	7.1469e-15	-8.75727
FBgn0010294	ng2	5.443	3.8402	19.339	0.93994	0.83693	1.1613	-3.13736	0.31627	0.0002907	0.0035698	-9.74151
FBgn0035040	CG4741	64.772	37.931	25.661	8.6032	3.3262	2.4734	-3.11325	2.15061	1.1564e-10	5.603e-09	-8.91243
FBgn0039031	CG17244	1494	1381.2	1782	116.94	108.04	322.68	-3.08544	7.23759	8.2103e-19	1.0436e-16	-8.50382
FBgn0035608	blanks	26.731	30.189	27.626	4.763	3.4315	1.2841	-3.07692	1.60596	4.2895e-13	2.8755e-11	-8.91967
FBgn0053225	CG33225	313.98	315.38	325.3	52.165	25.23	42.822	-2.99278	4.97268	4.8769e-41	3.9775e-38	-7.94114
FBgn0027578	CG14526	904.63	1141.9	950.38	84.826	68.554	234.53	-2.94574	6.61875	2.6949e-16	2.536e-14	-7.72579
FBgn0015035	Cyp4e3	1227	488.39	2014	121.74	101.23	276.63	-2.89513	6.93857	1.2685e-10	6.0857e-09	-7.46475
FBgn0040606	CG6503	31.033	25.246	46.979	3.7576	0.66149	10.033	-2.85264	1.89533	9.3245e-09	3.4568e-07	-7.14485
FBgn0033133	Tsp42Ek	1202.8	1879.7	1917	143.38	124.2	425.62	-2.84671	7.36671	2.4272e-13	1.6848e-11	-7.2122
FBgn0034276	CG6385	883	663.79	819.4	33.595	43.536	251.83	-2.83158	6.2918	2.4145e-07	6.7904e-06	-7.19292
FBgn0051414	CG31414	223.16	198.54	229.13	21.615	13.105	57.833	-2.81568	4.44861	8.5433e-16	7.4655e-14	-7.03197
FBgn0085428	Nox	481.16	227.63	336.58	39.584	50.599	59.982	-2.79813	5.12422	1.2906e-23	2.5778e-21	-6.96148
FBgn0034471	Obp56e	20.262	9.6597	26.537	2.8377	1.6443	3.4332	-2.79311	1.12661	1.2129e-06	2.7542e-05	-7.13295
FBgn0013467	igl	8.6273	8.7281	18.356	2.8662	0.79729	1.2015	-2.78496	0.59012	2.1268e-05	0.00036138	-7.34049
FBgn0040104	lectin-24A	278.21	134.21	165.78	1.6333	4.4391	75.034	-2.78365	4.27902	0.0007437	0.0079138	-7.12891
FBgn0023541	Cyp4d14	325.21	171.21	189.32	48.441	26.298	25.843	-2.76292	4.52571	7.2882e-20	1.0646e-17	-6.81772
FBgn0027657	glob1	943.94	585.84	1118	87.673	62.469	241.38	-2.75172	6.46385	8.3478e-12	4.5138e-10	-6.76279
FBgn0003372	Sgs1	533.2	667.72	978.85	96.341	108.02	121.55	-2.74138	6.18563	4.3537e-30	1.5781e-27	-6.68824
FBgn0262683	CG43153	123.87	125.58	118.68	10.262	12.591	32.806	-2.7399	3.65311	1.6548e-19	2.3471e-17	-6.61402
FBgn0052117	CG32117	22.501	34.134	21.515	0.88458	4.3021	6.759	-2.69838	1.55186	1.0186e-08	3.742e-07	-6.54211
FBgn0031313	CG5080	616.12	548	593.33	58.37	57.651	156.07	-2.69059	5.8839	4.8617e-18	5.6645e-16	-6.45905
FBgn0053093	CG33093	112.23	111.9	150.31	18.892	17.018	23.031	-2.66766	3.68346	1.2687e-24	2.8876e-22	-6.35279
FBgn0262858	CG43222	22.524	38.048	21.522	2.7992	3.3638	6.7854	-2.65496	1.62115	1.3782e-08	4.905e-07	-6.34009
FBgn0039022	CG4725	291.51	240.36	318.1	22.412	18.038	106.73	-2.51319	4.86777	1.1379e-07	3.416e-06	-5.77504
FBgn0030398	Cpr11B	5.5368	16.558	23.459	2.8378	2.5584	2.3507	-2.49794	0.90881	0.00010701	0.0015223	-5.88026
FBgn0038979	CG7046	4.4287	13.648	16.325	1.8847	2.6077	1.2195	-2.49653	0.58425	0.00024135	0.0030695	-6.02281
FBgn0030926	psh	139.94	156.75	138.12	6.3685	23.047	47.569	-2.49397	3.91949	1.6553e-10	7.8262e-09	-5.64802
FBgn0031558	CG16704	5177.2	4173.9	6614.5	928.36	745.42	1176.7	-2.48585	9.08895	5.9575e-27	1.6659e-24	-5.60102
FBgn0034784	CG9826	20.048	2.8506	11.255	0.91858	2.6075	2.3082	-2.47648	0.56764	0.0010095	0.010228	-5.85395
FBgn0038105	yellow-f2	56.521	35.934	60.31	4.6382	4.0237	19.02	-2.47262	2.46831	1.4357e-08	5.0909e-07	-5.51859
FBgn0035806	PGRP-SD	180.66	200.49	266.91	19.621	18.211	79.402	-2.45622	4.49071	4.9537e-09	1.9316e-07	-5.52792
FBgn0263046	CG43341	101.36	68.049	105.32	12.208	9.9728	28.314	-2.45209	3.28132	5.4129e-13	3.5554e-11	-5.44074
FBgn0035358	CG14949	167.8	33.884	59.425	20.888	12.676	15.152	-2.41602	3.21036	1.1702e-06	2.6879e-05	-5.35982
FBgn0035426	CG12078	12.806	11.673	12.277	2.8468	2.5824	1.2368	-2.37145	0.66889	5.2217e-06	0.00010283	-5.51395
FBgn0041605	cpx	189.12	190.75	240.34	47.364	29.645	43.949	-2.36075	4.44309	2.063e-25	5.3133e-23	-5.12748
FBgn0034860	CG9812	294.11	712.77	449.12	134.57	27.154	124.59	-2.34183	5.66505	9.4233e-08	2.9093e-06	-5.08533
FBgn0033128	Tsp42Eg	157.96	118.68	156.49	37.968	23.809	23.432	-2.33703	3.93525	2.9792e-21	5.0271e-19	-5.08315
FBgn0030073	CG10962	4117.4	2292.3	2833.7	617.35	508.89	711.81	-2.33029	8.32566	7.8697e-23	1.4575e-20	-5.02892
FBgn0003867	tsl	302.19	268.62	311.99	50.011	44.183	82.74	-2.32639	4.95313	1.6752e-24	3.7261e-22	-4.98943
FBgn0034540	Lrt	272.2	212.14	254.71	28.129	43.548	76.71	-2.32012	4.70006	3.0507e-17	3.2811e-15	-4.98056
FBgn0000592	Est-6	21.443	19.42	35.732	4.7106	3.3055	7.9382	-2.2592	1.58491	7.9948e-07	1.9308e-05	-4.8009
FBgn0026760	Tehao	21.312	18.488	17.405	2.8063	3.3852	5.6838	-2.25315	1.21674	5.8789e-07	1.4493e-05	-4.81714
FBgn0029994	CG2254	240.51	303.7	361.04	53.788	74.032	61.546	-2.25314	4.99865	7.1835e-25	1.6739e-22	-4.78043
FBgn0085330	CG34301	17.098	15.556	19.422	5.7259	3.4086	1.2987	-2.24781	1.09765	9.4013e-07	2.2225e-05	-4.99137
FBgn0031811	CG13982	6.5746	13.619	22.435	0.90055	3.4545	4.5333	-2.23061	0.86654	0.00028643	0.0035306	-4.79601
FBgn0052647	CG32647	40.495	31.118	34.787	5.6282	8.6367	8.0928	-2.23022	2.01588	2.2413e-10	1.0446e-08	-4.75899
FBgn0002564	Lsp1gamma	171760	184750	258180	42965	35535	52546	-2.22978	14.3967	5.2204e-24	1.0644e-21	-4.69064
FBgn0031692	TpnC25D	21.263	10.651	19.42	5.7253	1.5898	3.4992	-2.21703	1.08547	1.9508e-05	0.00033732	-4.74686
FBgn0263321	CG43402	291.59	198.43	426.42	101.55	23.923	71.748	-2.21415	5.0234	1.0638e-08	3.8847e-07	-4.64677
FBgn0050009	CR30009	6.5465	14.62	16.336	3.8093	0.74644	3.4334	-2.2114	0.72189	0.0002415	0.0030695	-4.69418
FBgn0053481	dpr7	4.4182	7.7547	20.369	1.8767	2.5821	2.3301	-2.19979	0.55951	0.0022973	0.019722	-4.7934
FBgn0032021	CG7781	22.496	26.284	28.626	6.6404	3.2881	6.881	-2.19842	1.60913	4.7682e-08	1.5555e-06	-4.6049
FBgn0033367	PO45	1093.7	1165.1	1623.4	217.21	280.29	375.05	-2.15405	7.10701	4.0656e-20	6.1216e-18	-4.44926
FBgn0039152	Rootletin	883.99	475.83	883.78	99.895	96.017	307.44	-2.15159	6.31848	2.9243e-08	9.8351e-07	-4.45732
FBgn0261362	proPO-A1	389.09	548.98	780.38	100.98	98.969	191.4	-2.13423	5.9394	2.6079e-13	1.7849e-11	-4.39109
FBgn0036727	CG7589	16.052	24.402	11.298	3.7743	4.3034	3.5188	-2.11873	1.11526	1.2891e-05	0.00023208	-4.46273
FBgn0011288	Snap25	8.6963	12.625	25.49	3.7829	5.2528	1.2985	-2.11175	0.99268	0.0001867	0.0024674	-4.52975
FBgn0034642	CG15674	15.089	25.338	24.533	4.7177	0.64909	10.063	-2.09395	1.40614	4.5267e-05	0.00070434	-4.21004
FBgn0038194	Cyp6d5	738.06	917	850.1	190.95	211.97	183.46	-2.09325	6.48748	5.7779e-30	2.0196e-27	-4.27225
FBgn0014396	tim	73.544	52.513	61.386	12.24	14.562	17.263	-2.08415	2.80973	9.6547e-13	6.0961e-11	-4.25378
FBgn0030105	CG15369	1283	1723.8	3033.9	512.47	421.56	502.18	-2.07224	7.75878	3.5063e-14	2.6195e-12	-4.206
FBgn0033872	CG6329	31.116	33.049	56.171	6.5532	7.6	14.744	-2.05976	2.21378	2.1968e-07	6.196e-06	-4.16428
FBgn0040725	CG13946	3.3265	6.794	15.278	1.8845	0.7792	3.3836	-2.04002	0.31563	0.0068435	0.047434	-4.19997
FBgn0002563	Lsp1beta	368060	242320	314860	72107	71100	83341	-2.03002	15.0239	2.987e-24	6.4964e-22	-4.08408
FBgn0035241	CG12105	72.38	28.094	66.443	17.087	12.81	10.615	-2.0289	2.65781	1.5505e-07	4.5162e-06	-4.12019
FBgn0261090	Sytbeta	7.5611	11.687	13.279	0.90633	3.4804	3.4329	-2.01549	0.58733	0.0006135	0.0067617	-4.15967
FBgn0041712	yellow-d	184.62	122.55	188.18	36.811	33.162	54.023	-2.00211	4.1883	2.6111e-15	2.1656e-13	-3.99489
FBgn0024740	Lip2	14.979	16.551	16.367	8.6363	0.68918	2.4251	-2.00206	1.0395	7.9272e-05	0.0011737	-4.07614
FBgn0038839	CG10830	12.89	18.517	16.366	3.7741	3.3856	4.6043	-2.00109	1.03889	2.0299e-05	0.00034731	-4.06095
FBgn0250836	CG8628	38.199	16.474	24.565	7.5847	5.047	6.9445	-1.99975	1.66809	9.9408e-06	0.0001844	-4.04767
FBgn0016122	Acer	243.43	233.62	217.92	45.239	45.951	84.971	-1.98752	4.67385	2.2761e-17	2.5029e-15	-3.94508
FBgn0036262	CG6910	5243.6	5061.6	8091.7	2050.9	1558	1094.8	-1.96743	9.38467	1.1313e-14	9.0017e-13	-3.91116
FBgn0004580	Cbp53E	9.6931	9.7015	19.38	3.7909	2.5144	3.478	-1.95288	0.79667	0.00041177	0.0048033	-3.96335
FBgn0033112	Spn42Db	59.848	52.511	76.665	16.065	16.284	16.252	-1.95056	2.8463	7.2451e-12	3.9613e-10	-3.8893
FBgn0023535	arg	186.73	128.41	171.84	20.547	42.008	64.083	-1.94419	4.17541	1.5508e-10	7.3676e-09	-3.84545
FBgn0039777	Jon99Fii	288	67.891	314.92	46.19	87.467	41.128	-1.94282	4.62886	1.1433e-05	0.00020954	-3.83792
FBgn0040507	ACXD	107.72	69.996	104.31	14.977	21.292	37.615	-1.93671	3.40769	4.3876e-10	1.9542e-08	-3.81715
FBgn0031292	CG15824	101.18	64.186	67.556	21.769	16.99	21.962	-1.93624	3.13871	2.1265e-11	1.125e-09	-3.83594
FBgn0030270	CG15199	17.113	13.587	23.487	0.87453	3.3425	10.032	-1.9344	1.20373	0.00022775	0.0029252	-3.80286
FBgn0025383	CG14780	16.947	5.786	12.272	1.8617	1.6248	5.606	-1.93404	0.67893	0.0014786	0.013756	-3.84988
FBgn0039023	CG4723	321.49	307.56	375.39	103.18	64.674	96.096	-1.93051	5.20967	5.6809e-21	9.4236e-19	-3.80542
FBgn0015001	iotaTry	25.569	19.441	22.507	3.7314	7.8385	5.8148	-1.92573	1.47652	1.4377e-06	3.1762e-05	-3.8837
FBgn0051288	CG31288	13.942	17.531	17.384	2.7997	5.1996	4.6257	-1.92203	1.07797	1.2401e-05	0.00022476	-3.86986
FBgn0034063	CG8389	311.75	275.45	285.42	70.846	74.53	85.624	-1.9188	5.01064	5.3686e-25	1.2815e-22	-3.77758
FBgn0036422	CG3868	860.36	384.31	764.11	172.03	179.22	180.93	-1.9155	6.20547	1.3734e-13	9.6701e-12	-3.77463
FBgn0029712	CG15912	17.076	6.7351	25.498	5.7056	1.5567	5.7083	-1.91308	1.08753	0.0011813	0.011608	-3.80161
FBgn0010042	GstD6	26.68	22.362	27.608	10.488	7.7696	1.423	-1.90483	1.64097	2.6083e-06	5.4662e-05	-3.8947
FBgn0035887	Jon66Cii	246.98	63.072	126.9	40.666	42.995	33.86	-1.89234	4.02979	8.6065e-07	2.0583e-05	-3.71808
FBgn0035026	Fcp1	355.52	304.64	329.4	97.442	75.15	94.996	-1.88824	5.19683	4.1002e-24	8.5381e-22	-3.69807
FBgn0036279	Ncc69	539.17	463.31	471.61	126.63	124.16	152.81	-1.87075	5.77159	1.7444e-25	4.6143e-23	-3.65235
FBgn0023001	melt	297.72	204.34	243.48	54.703	73.888	75.205	-1.86993	4.79542	4.9669e-18	5.719e-16	-3.65827
FBgn0031277	CG13947	61.321	87.495	225.78	40.757	12.153	49.2	-1.86613	3.81938	0.00010956	0.0015563	-3.66855
FBgn0263354	CG42784	27.666	21.401	19.462	4.6893	5.9784	8.0083	-1.86485	1.50998	5.6338e-06	0.00011028	-3.66936
FBgn0031306	CG4577	30.88	19.415	28.629	4.6694	6.8278	10.243	-1.85523	1.69336	4.732e-06	9.4321e-05	-3.63033
FBgn0030769	CG13012	104.72	114.87	116.61	28.318	35.321	29.096	-1.84971	3.66945	9.4108e-17	9.3983e-15	-3.62538
FBgn0042101	CG18744	6.4656	6.7939	12.241	1.8766	1.6644	3.409	-1.84537	0.34855	0.0048136	0.036079	-3.66914
FBgn0263504	CR43493	31.037	33.083	39.866	14.282	6.682	8.2235	-1.82047	2.06278	1.4527e-07	4.2568e-06	-3.56269
FBgn0083042	snoRNA:Psi18S-1854a	166.3	148.99	72.768	27.285	52.03	30.422	-1.81679	3.87861	2.3563e-08	8.0352e-07	-3.53625
FBgn0028519	CG4500	2342	2791.8	2637.3	637.99	590.23	1032.5	-1.78182	8.1824	2.0458e-15	1.7318e-13	-3.43744
FBgn0032946	nrv3	30.155	33.988	80.64	28.688	3.8402	9.5279	-1.7782	2.51743	0.0010287	0.010358	-3.44262
FBgn0050339	CG30339	13.79	4.8154	12.259	2.8293	2.5356	3.456	-1.76744	0.56434	0.0031508	0.025633	-3.49901
FBgn0263461	snoRNA:CG32479-a	160.1	181.15	100.36	15.772	50.855	63.025	-1.76548	4.07453	1.0392e-06	2.4331e-05	-3.40612
FBgn0036157	CG7560	27.682	17.472	25.562	3.7122	6.8488	10.219	-1.76298	1.57055	2.3383e-05	0.00039166	-3.40308
FBgn0013688	mt:srRNA	96.402	138.22	177.9	83.842	4.2481	33.894	-1.75642	3.97938	0.0021992	0.018964	-3.38177
FBgn0036789	AlCR2	13.82	8.7339	11.255	3.7909	2.5144	3.478	-1.75413	0.67183	0.00097031	0.0099024	-3.45578
FBgn0053056	CG33056	382.2	233.48	428.54	133.53	89.757	87.356	-1.74689	5.30352	1.8565e-12	1.1216e-10	-3.36148
FBgn0037060	CG10508	17.203	25.328	25.556	6.609	7.7669	5.8722	-1.72494	1.5303	1.1466e-05	0.00020976	-3.36264
FBgn0034783	CG9825	15.887	3.8309	13.279	2.8215	3.4307	3.4778	-1.72037	0.64706	0.0055839	0.040273	-3.39125
FBgn0028482	CG16857	245.5	200.48	218.93	63.297	60.696	78.568	-1.71789	4.66732	2.3123e-18	2.7598e-16	-3.28252
FBgn0039778	Jon99Fi	311.62	87.36	392.63	69.864	92.013	78.934	-1.71617	4.91466	1.0845e-05	0.00019913	-3.28727
FBgn0003068	per	18.186	22.414	17.407	9.5447	4.1775	3.6262	-1.71177	1.32974	4.9664e-05	0.00076786	-3.34365
FBgn0037723	SpdS	372.68	325.07	396.89	98.228	75.688	161.34	-1.71072	5.38172	8.5204e-13	5.4503e-11	-3.26509
FBgn0034052	CG8299	48.004	27.156	58.235	6.4876	20.083	13.914	-1.70895	2.419	1.276e-05	0.0002304	-3.29496
FBgn0005670	Cyp4d1	4471.1	3253	4416.2	710.54	915.08	2098.6	-1.70433	8.84306	1.6439e-07	4.7459e-06	-3.25982
FBgn0032782	Rab9	61.759	24.203	63.356	9.3452	11.828	24.941	-1.69197	2.57734	0.00010184	0.0014551	-3.238
FBgn0004228	mex1	22.247	7.7232	15.344	3.7584	3.3438	6.8105	-1.69184	1.02716	0.0017036	0.015367	-3.25704
FBgn0039788	Rpt6R	17.154	19.461	23.504	4.6896	6.8948	6.9232	-1.68295	1.38157	2.5884e-05	0.00042936	-3.24834
FBgn0004575	Syn	51.333	50.584	67.466	17.003	17.117	18.521	-1.68111	2.7538	2.062e-09	8.4791e-08	-3.2177
FBgn0032287	CG6415	1307.2	1236.2	1645.9	410.24	359.69	537.6	-1.6807	7.31578	2.1233e-16	2.0374e-14	-3.20398
FBgn0013674	mt:CoI	17836	21773	45542	16691	2466.2	7488.7	-1.67611	11.6591	0.00081796	0.0085803	-3.19565
FBgn0043578	PGRP-SB1	44.893	39.865	57.237	4.5639	8.2722	31.398	-1.6751	2.51323	0.0004584	0.0052711	-3.21008
FBgn0028938	CG16886	11.94	15.523	37.725	6.6094	8.6855	4.7754	-1.67367	1.48567	0.001217	0.011887	-3.24798
FBgn0001125	Got2	2458.3	2302.1	2639.3	778.06	771.69	771.46	-1.67239	8.13688	7.893e-23	1.4575e-20	-3.18786
FBgn0039613	CG14527	32.03	25.264	36.794	5.5856	11.223	12.592	-1.6719	1.96206	3.4273e-06	7.0173e-05	-3.20021
FBgn0039319	CG13659	15.016	14.572	23.483	4.7041	6.9432	4.7052	-1.66465	1.22726	0.00013182	0.0018145	-3.24544
FBgn0039470	CG6296	515.25	204.23	356	115.35	112.3	111.41	-1.66406	5.36522	1.1805e-09	5.0235e-08	-3.17195
FBgn0011722	Tig	4112.5	4327.8	4619.8	1609.2	1154.6	1364.3	-1.66165	8.95846	2.4613e-19	3.3457e-17	-3.16371
FBgn0033742	CG8550	305.44	268.6	356.96	114.52	91.603	88.393	-1.6576	5.16026	1.8492e-17	2.0566e-15	-3.16112
FBgn0004516	Gad1	23.456	16.505	24.531	9.5169	7.769	2.5575	-1.65219	1.47128	8.7553e-05	0.0012789	-3.25005
FBgn0038420	CG10311	289.69	391.31	479.68	138.12	110.38	121.85	-1.64769	5.47914	7.8362e-15	6.3383e-13	-3.13401
FBgn0085488	CG34459	20.339	23.368	23.523	14.363	4.108	2.5713	-1.64546	1.52985	0.00028918	0.0035555	-3.19499
FBgn0031995	CG8475	915.29	1193.5	880.84	284.46	283.53	391.48	-1.6408	6.83992	6.924e-16	6.217e-14	-3.11592
FBgn0259998	CG17571	1024.3	231.42	584.15	149.16	244.93	198.37	-1.63494	6.14253	1.9781e-05	0.00034067	-3.10548
FBgn0013684	mt:ND5	625.27	893.46	2138.7	748.77	122.92	306.85	-1.63378	7.13123	0.0015856	0.014517	-3.10336
FBgn0000303	Cha	17.075	14.583	17.384	2.7803	6.9675	5.7739	-1.63284	1.137	0.00012824	0.0017703	-3.15958
FBgn0030326	CG2444	21510	20564	23664	7846.9	7851.1	5511	-1.63194	11.2964	2.7589e-17	3.0001e-15	-3.09953
FBgn0052448	CG32448	105.7	86.574	116.58	30.205	25.423	44.746	-1.62883	3.60395	1.8529e-10	8.7184e-09	-3.07703
FBgn0039024	CG4721	280.74	220.91	258.81	68.894	73.526	106.12	-1.61748	4.88304	1.5828e-14	1.2393e-12	-3.05971
FBgn0032144	CG17633	549.34	200.33	349.88	78.208	162.84	117.23	-1.61743	5.40813	7.1084e-07	1.7306e-05	-3.06899
FBgn0035667	Jon65Ai	358.91	78.625	156.59	59.494	96.907	39	-1.60825	4.53139	0.00024249	0.0030782	-3.04054
FBgn0020385	pug	8827.1	7591.6	7602.9	2748.3	2228.1	2908	-1.60737	9.85044	7.9996e-19	1.0302e-16	-3.04673
FBgn0038674	CG14285	78.8	62.299	44.063	27.548	17.88	15.336	-1.59657	2.89425	2.764e-07	7.5561e-06	-3.04723
FBgn0032024	CG14273	8.6846	15.579	20.414	5.6882	4.2363	4.6673	-1.59308	1.03618	0.0013727	0.013043	-3.06183
FBgn0261567	CG42681	19.194	10.646	23.484	7.6024	5.0875	4.7242	-1.58664	1.24865	0.00048802	0.0055732	-3.06212
FBgn0038828	CG17270	7.6186	15.589	18.377	8.6135	1.542	3.5577	-1.58314	0.95268	0.0055266	0.039977	-3.03245
FBgn0016075	vkg	1835.6	1398.7	1876.1	561.55	514.22	630.77	-1.58266	7.62566	5.7513e-17	5.9251e-15	-2.9946
FBgn0026593	CG5707	178.24	122.55	186.13	41.457	42.531	79.18	-1.58107	4.25766	4.3574e-09	1.7265e-07	-2.98416
FBgn0039048	CG17111	74.627	57.395	61.394	25.595	15.142	24.238	-1.57596	2.96244	9.1711e-09	3.4259e-07	-2.97678
FBgn0263999	CG43742	16.039	10.654	23.474	3.7376	6.023	6.8801	-1.57531	1.17764	0.0011206	0.011123	-3.01472
FBgn0031305	Iris	91.906	102.22	101.27	37.886	31.663	29.171	-1.57466	3.55106	2.2185e-12	1.3002e-10	-2.99226
FBgn0030966	CG7280	1444.7	1197.3	1294.1	468.02	457.95	401.65	-1.56686	7.25319	4.4886e-19	6.0178e-17	-2.96478
FBgn0032772	CG17350	19.357	20.396	38.784	18.193	2.2534	5.9758	-1.56279	1.74989	0.0032467	0.026347	-2.97239
FBgn0030864	CG8173	90.872	115.89	97.199	19.655	42.315	41.476	-1.5545	3.59791	5.1034e-09	1.982e-07	-2.93835
FBgn0040634	CG4186	11.796	11.66	17.36	5.6966	2.4378	5.7313	-1.5527	0.93598	0.0014515	0.013573	-2.94367
FBgn0264087	Slob	13.905	16.565	13.311	2.7858	3.3236	8.9885	-1.55111	1.02364	0.0011169	0.011097	-2.89981
FBgn0002939	ninaD	91.487	23.188	79.728	18.854	13.348	34.153	-1.54433	2.9737	0.00073852	0.0078735	-2.92974
FBgn0035039	CG3608	112.97	70.004	90.028	26.397	33.526	33.55	-1.54212	3.44849	2.6376e-09	1.0756e-07	-2.92065
FBgn0085391	CG34362	31.976	29.205	24.579	6.5485	11.224	11.503	-1.542	1.86989	9.8372e-06	0.00018304	-2.92941
FBgn0039464	CG6330	131.27	110.93	121.74	32.977	28.725	64.062	-1.54089	3.85716	9.9134e-09	3.6612e-07	-2.89383
FBgn0037560	CR18228	38.391	28.18	38.853	15.191	10.18	10.537	-1.54036	2.14188	3.2729e-06	6.7721e-05	-2.93595
FBgn0010014	CanB	12.93	12.606	28.558	7.5935	5.0669	5.8354	-1.53003	1.28214	0.0013037	0.012571	-2.92466
FBgn0034318	CG14500	39.094	10.625	14.371	6.595	10.475	4.8073	-1.52993	1.49236	0.0054116	0.039459	-2.92952
FBgn0035204	CG2277	489.21	637.67	490.05	162.5	113.21	285.11	-1.52811	5.98499	2.1848e-08	7.5027e-07	-2.88315
FBgn0261262	CG42613	15.144	32.177	28.623	7.5326	10.378	8.169	-1.52656	1.71686	0.00018681	0.0024674	-2.91201
FBgn0013773	Cyp6a22	151.55	106.01	159.54	61.615	40.033	43.112	-1.52303	4.05024	2.7391e-10	1.2645e-08	-2.88132
FBgn0028526	CG15293	1117.1	919.76	1542.5	526.85	371.86	347.32	-1.52179	7.12804	4.0872e-11	2.1054e-09	-2.87261
FBgn0035886	Jon66Ci	1587.1	379.37	953.43	242.71	480.38	295.02	-1.52074	6.83527	9.3015e-05	0.0013485	-2.86796
FBgn0032025	CG7778	153.99	175.18	246.43	91.962	63.346	44.69	-1.52007	4.50776	5.5272e-09	2.1297e-07	-2.87803
FBgn0015570	alpha-Est2	703.7	525.54	797.85	182.26	136.28	387.93	-1.51942	6.31133	1.2445e-06	2.8194e-05	-2.86932
FBgn0042206	GstD10	152.05	250.17	344.59	135.63	55.947	68.875	-1.51869	4.8805	4.0919e-06	8.2744e-05	-2.86736
FBgn0051221	CG31221	24.502	11.603	28.591	7.5613	7.7222	7.0024	-1.51705	1.50768	0.00047118	0.0053934	-2.903
FBgn0033448	hebe	101.17	52.461	76.726	21.659	31.939	26.7	-1.51319	3.2174	3.4646e-07	9.2141e-06	-2.86878
FBgn0003356	Jon99Cii	827.07	214.87	693.5	145.35	282.18	181.26	-1.51201	6.08947	6.7578e-05	0.0010175	-2.85064
FBgn0026315	Ugt35a	120.59	84.599	126.8	53.146	27.031	36.076	-1.51182	3.73146	1.5981e-08	5.6059e-07	-2.85575
FBgn0003312	sad	3541.5	1893.2	1678.8	1108.3	663.13	733.52	-1.50565	8.1216	9.4752e-08	2.9162e-06	-2.83978
FBgn0030775	CG9673	61.49	19.359	30.727	11.307	12.842	14.977	-1.50492	2.22553	0.00045459	0.0052403	-2.85171
FBgn0259229	CG42329	30.833	18.448	23.535	7.5386	7.659	10.332	-1.50467	1.66459	7.8816e-05	0.0011687	-2.85222
FBgn0262722	CG43166	1186.8	1886.5	2255.6	502.76	572.55	803.08	-1.50441	7.706	1.8569e-09	7.7517e-08	-2.83695
FBgn0030304	Cyp4g15	26.581	14.546	22.498	2.7422	12.315	7.0008	-1.50348	1.48902	0.00075777	0.0080437	-2.88444
FBgn0003358	Jon99Ci	72.319	22.241	62.353	17.949	19.776	17.465	-1.50045	2.68949	0.00014694	0.0019974	-2.84314
FBgn0039800	Npc2g	1181.1	1062.9	1294	376.17	422.74	454.51	-1.49727	7.11798	3.3762e-17	3.553e-15	-2.82268
FBgn0032100	CG13108	9.6316	9.727	11.245	1.8487	4.3272	4.5814	-1.484	0.61543	0.0050481	0.037312	-2.84491
FBgn0035670	CG10472	219.24	69.92	100.33	29.105	56.048	54.251	-1.48086	3.96411	8.2094e-05	0.0012119	-2.79397
FBgn0019985	mGluRA	9.7446	13.607	23.463	4.7033	4.1946	7.9623	-1.47035	1.12048	0.0034306	0.027498	-2.77663
FBgn0262353	CG43051	261.74	253.03	349.78	100.18	89.746	123.72	-1.46546	5.1045	1.5139e-12	9.2604e-11	-2.75645
FBgn0260753	Pdfr	16.957	9.7103	9.2311	4.7348	1.5564	6.7859	-1.46148	0.8028	0.0064017	0.044849	-2.74513
FBgn0051451	CR31451	63.175	70.047	102.21	27.396	30.963	26.769	-1.46125	3.26246	7.0931e-08	2.2466e-06	-2.76562
FBgn0032733	CG15170	14.897	7.7405	15.323	0.87529	7.9475	4.646	-1.46057	0.86447	0.0052832	0.038686	-2.8184
FBgn0031000	Muc18B	21.186	8.7087	13.309	2.7805	7.8913	4.686	-1.45725	1.01837	0.0037777	0.029649	-2.81314
FBgn0031249	CG11911	801.52	355.12	602.53	165.25	268.13	207.74	-1.45553	6.12368	7.3695e-08	2.3266e-06	-2.7439
FBgn0042696	NfI	12.929	18.497	22.472	11.468	3.2389	4.76	-1.45391	1.2967	0.0013421	0.012853	-2.7687
FBgn0085383	CG34354	12.929	20.462	20.442	5.6486	5.9575	8.0306	-1.45109	1.2982	0.00071785	0.0077035	-2.74145
FBgn0032773	fon	13291	12424	17135	4599.2	4494.4	6602.3	-1.44896	10.726	5.3233e-12	2.9942e-10	-2.73001
FBgn0039467	CG14253	146.39	166.47	165.71	71.041	31.884	73.763	-1.44218	4.26912	2.3269e-08	7.9627e-07	-2.70856
FBgn0039612	CG14523	101.62	148.04	117.66	37.72	34.813	64.251	-1.43218	3.89855	3.6276e-08	1.2035e-06	-2.6854
FBgn0013676	mt:CoIII	16351	17153	34023	15462	1852.2	7722.8	-1.43139	11.3867	0.0050379	0.037302	-2.69709
FBgn0005278	Sam-S	2095.2	1735.5	2230.1	756.32	583.36	910.02	-1.43025	7.9111	2.1846e-12	1.3002e-10	-2.69405
FBgn0051233	CG31233	69.259	38.84	65.437	21.746	21.427	20.918	-1.42931	2.8467	1.8214e-06	3.9526e-05	-2.70765
FBgn0032022	CG14275	163.22	106.98	150.36	30.97	58.501	66.779	-1.42868	4.08775	1.1026e-07	3.3409e-06	-2.69158
FBgn0262972	CR43283	1123.6	1156.4	1513.9	571.23	431.07	409.87	-1.42516	7.23739	1.1175e-12	6.9222e-11	-2.68657
FBgn0004878	cas	18.262	25.322	26.577	10.435	11.297	3.7543	-1.42339	1.63496	0.00025977	0.0032534	-2.75289
FBgn0033423	CG1809	59.422	11.535	43.956	9.3557	22.754	10.655	-1.42296	2.28672	0.0054147	0.039459	-2.6871
FBgn0034417	CG15117	33.959	16.489	21.501	12.369	3.1357	11.443	-1.41804	1.6699	0.0019096	0.016852	-2.66995
FBgn0034588	CG9394	55.204	18.381	37.847	4.5659	25.519	11.743	-1.41103	2.24885	0.0044094	0.033662	-2.66406
FBgn0039407	CG14544	11.788	10.681	17.357	2.7858	3.3236	8.9885	-1.4098	0.93967	0.0053673	0.039172	-2.63785
FBgn0053138	CG33138	2114.2	1083.2	2092.9	712.9	691.2	588.49	-1.40837	7.7208	6.1115e-09	2.3364e-07	-2.65499
FBgn0052198	CG32198	39.841	53.462	115.4	34.171	13.216	31.087	-1.40782	3.10988	0.00066058	0.0071755	-2.65952
FBgn0000299	Cg25C	3559.1	2662.2	3088.4	1202.6	1033.8	1280.4	-1.40462	8.53649	2.6352e-14	2.0308e-12	-2.64721
FBgn0024941	RSG7	12.947	22.417	21.465	6.6017	8.6611	5.89	-1.40258	1.37498	0.00068212	0.0073759	-2.68659
FBgn0037978	KLHL18	461.52	556.8	627.03	190.9	177.15	255.77	-1.40136	6.04365	2.1973e-12	1.3002e-10	-2.63754
FBgn0029648	CG3603	237.21	262.81	305.82	107.82	83.672	114.58	-1.39954	5.02181	1.1302e-12	6.9566e-11	-2.63284
FBgn0053307	CG33307	583.06	443.77	693.5	222.18	175.33	255.92	-1.39761	6.10819	4.833e-11	2.4382e-09	-2.63277
FBgn0030261	CG15203	341.78	330.92	400.96	131.38	127.62	149.42	-1.39594	5.43268	2.0526e-15	1.7318e-13	-2.62881
FBgn0085244	CG34215	245.75	180.91	402.87	127.8	85.367	102.16	-1.39457	5.06316	3.4638e-07	9.2141e-06	-2.6307
FBgn0086677	jeb	14.04	23.374	27.578	7.5452	5.8605	11.397	-1.39435	1.55053	0.0010765	0.01075	-2.62036
FBgn0035666	Jon65Aii	253.72	92.288	199.45	50.875	99.409	57.189	-1.39373	4.46472	3.7698e-05	0.000597	-2.62906
FBgn0086667	snoRNA:Psi28S-3342	183.53	190.87	107.53	89.18	31.844	62.607	-1.39149	4.29088	1.1684e-05	0.00021255	-2.62445
FBgn0026150	ApepP	506.29	578.23	573.88	212.72	171.05	251.25	-1.3874	6.05887	1.3576e-13	9.6284e-12	-2.61157
FBgn0058196	Maf1	46.141	46.638	100.09	39.019	11.486	23.271	-1.38373	3.0065	0.00069321	0.0074801	-2.61425
FBgn0031598	CG3338	247.85	265.73	295.61	109.71	93.254	107.81	-1.38165	5.03199	3.3578e-14	2.5279e-12	-2.60379
FBgn0030615	Cyp4s3	1344.6	1361.8	1543.6	587.17	472.97	571.78	-1.38121	7.41322	6.7414e-15	5.4981e-13	-2.60429
FBgn0031424	VGlut	69.521	60.271	107.3	23.529	34.45	33.521	-1.37056	3.29684	2.0731e-06	4.4397e-05	-2.59117
FBgn0033809	CG4630	200.74	204.43	183.14	70.856	79.83	76.557	-1.37055	4.5796	9.3274e-14	6.762e-12	-2.5889
FBgn0031653	Jon25Biii	1952.5	525.39	1331.9	341.95	716.33	416.9	-1.36937	7.2588	0.00026947	0.0033549	-2.58259
FBgn0051198	CG31198	263.34	97.154	211.72	71.827	76.365	73.116	-1.36874	4.53995	3.7796e-06	7.6904e-05	-2.5856
FBgn0085229	CG34200	65.359	83.698	111.42	34.995	20.086	46.989	-1.35622	3.43502	1.0816e-05	0.00019897	-2.55194
FBgn0011582	DopR	18.109	16.551	13.321	5.6558	5.0658	8.0086	-1.35471	1.17713	0.0017452	0.01567	-2.56169
FBgn0013686	mt:lrRNA	81592	90017	181960	79121	15258	44551	-1.34763	13.7982	0.0021904	0.018904	-2.54494
FBgn0031559	CG3513	594.89	600.57	685.36	306.54	192.42	240.21	-1.34753	6.24987	7.5893e-12	4.1265e-10	-2.5445
FBgn0013672	mt:ATPase6	2276	2606.7	4617.5	1947.2	441.86	1346.6	-1.34637	8.58181	0.00078407	0.0082771	-2.54311
FBgn0039916	CG9935	9.7502	17.534	20.424	2.7623	6.8935	9.0898	-1.34531	1.1743	0.0054925	0.039819	-2.54503
FBgn0051373	CG31373	367.35	307.52	420.39	194.1	161.45	75.281	-1.34351	5.47404	6.4119e-07	1.5728e-05	-2.5422
FBgn0015323	VAChT	38.623	47.675	67.436	19.843	18.788	21.961	-1.3416	2.70664	8.6465e-06	0.00016305	-2.5372
FBgn0038135	CG8773	117	47.575	67.555	32.169	19.297	40.162	-1.34043	3.27528	0.00016936	0.0022736	-2.5334
FBgn0031483	CG9641	73.756	79.817	85.91	23.516	35.298	35.787	-1.33932	3.32033	4.0715e-08	1.3327e-06	-2.53151
FBgn0030425	CG3775	398.33	295.8	504.22	145.52	128.2	201.17	-1.33684	5.60661	5.7499e-09	2.2068e-07	-2.52343
FBgn0086675	fne	193.46	257.04	231.19	93.62	70.759	106.34	-1.33666	4.80107	1.1498e-10	5.5988e-09	-2.51807
FBgn0033446	CG1648	381.31	331.85	499.12	195.89	141.21	142.96	-1.33508	5.62254	1.2049e-10	5.8092e-09	-2.52527
FBgn0034914	CG5554	1881.9	3416.9	2150.4	793	847.65	1312.2	-1.33502	8.23464	1.7827e-07	5.1164e-06	-2.52272
FBgn0037212	nAcRalpha-80B	16.16	21.399	31.65	16.241	4.0156	7.0922	-1.33092	1.64401	0.0038515	0.030035	-2.5306
FBgn0058002	CG40002	69.563	79.802	101.21	36.923	22.761	40.304	-1.33092	3.38778	6.9963e-07	1.7076e-05	-2.50605
FBgn0038845	CG10827	97.623	22.232	48.117	23.651	27.674	15.416	-1.32916	2.82889	0.0027046	0.022604	-2.51677
FBgn0013678	mt:Cyt-b	6758	7727.8	15289	7237	1385	3246.4	-1.32697	10.2346	0.0029045	0.023988	-2.50875
FBgn0037936	CG6908	140.14	198.61	209.66	58.482	48.299	112.53	-1.32454	4.49472	3.3195e-06	6.8539e-05	-2.5006
FBgn0039564	CG5527	66.068	37.87	63.39	23.656	16.904	26.478	-1.32027	2.82789	1.8333e-05	0.00031756	-2.49602
FBgn0003357	Jon99Ciii	763.13	214.87	740.52	145.28	297.39	245.76	-1.31984	6.1277	0.00045887	0.0052711	-2.49629
FBgn0262636	Lin29	75.863	76.887	84.888	32.146	32.608	30.237	-1.31731	3.31417	1.2963e-08	4.6472e-07	-2.50169
FBgn0013675	mt:CoII	4666	5486.1	9459.3	4141.5	925.44	2844.2	-1.30962	9.63733	0.0011257	0.01115	-2.47896
FBgn0083970	CG34134	14.001	17.503	26.542	8.5218	8.6159	5.9247	-1.3083	1.42381	0.0017632	0.015774	-2.51691
FBgn0053217	CG33217	24.775	28.164	61.238	17.052	7.3466	21.667	-1.30797	2.31066	0.0028367	0.023468	-2.47857
FBgn0085425	CG34396	13.865	8.7194	16.34	2.7805	7.8913	4.686	-1.30622	0.93031	0.006195	0.043682	-2.5345
FBgn0004244	Rdl	34.146	22.318	40.867	14.201	10.127	14.979	-1.30574	2.09687	0.00021147	0.0027486	-2.47617
FBgn0035903	CG6765	15.065	26.334	19.445	9.4803	4.9571	10.312	-1.30344	1.49017	0.0019428	0.017099	-2.4584
FBgn0035495	CG14989	52.458	56.425	78.699	13.052	26.632	36.567	-1.30089	2.99244	6.4415e-05	0.00097439	-2.46006
FBgn0005666	bt	1850.5	1322.8	1591.8	658.01	535.47	742.01	-1.30015	7.60088	4.7206e-11	2.3938e-09	-2.46196
FBgn0028543	nimB2	3091.4	2195.9	2893	1029.5	1001.2	1291.8	-1.30007	8.37951	3.0402e-11	1.5912e-09	-2.46209
FBgn0035312	CG15820	165.73	201.49	245.44	63.176	62.136	124.19	-1.29898	4.65961	1.0005e-06	2.3538e-05	-2.45553
FBgn0010423	TpnC47D	82.006	49.571	62.413	25.506	30.162	23.354	-1.28499	3.0389	3.3338e-06	6.8546e-05	-2.45489
FBgn0051031	CG31031	25.486	14.561	17.405	9.4896	6.7897	7.0214	-1.28344	1.41496	0.0017804	0.015869	-2.46568
FBgn0033019	CG10395	22.558	24.295	41.861	15.19	7.471	13.828	-1.28142	1.98199	0.0011622	0.011466	-2.43125
FBgn0039645	CG11898	177.13	233.84	54.41	86.27	45.831	59.306	-1.27973	4.27244	0.0014072	0.013293	-2.43136
FBgn0039768	CG15533	76.468	17.364	55.214	18.879	16.088	26.371	-1.27691	2.67836	0.00445	0.033927	-2.42991
FBgn0035344	Cyp4d20	15.054	15.537	28.575	10.451	7.6816	5.9417	-1.27642	1.45599	0.0030742	0.025134	-2.45764
FBgn0039769	CG15534	320.83	124.43	189.29	91.736	85.695	84.762	-1.27364	4.71426	8.5892e-06	0.00016228	-2.42016
FBgn0032280	CG17105	90.548	53.455	71.612	29.296	38.967	20.128	-1.27298	3.18814	1.3003e-05	0.0002335	-2.43933
FBgn0030613	rab3-GEF	86.567	83.676	108.39	42.597	32.358	40.532	-1.27149	3.5515	5.1265e-08	1.6614e-06	-2.41268
FBgn0031866	neuroligin	16.171	23.356	31.656	12.344	6.6806	10.414	-1.27114	1.69751	0.0014544	0.013583	-2.41802
FBgn0042102	CG18745	32.94	14.523	27.604	9.4301	12.096	9.3532	-1.26402	1.76243	0.0017169	0.015458	-2.43098
FBgn0054034	CG34034	22.348	18.491	15.371	5.6218	9.5303	8.1124	-1.2551	1.39614	0.0015005	0.013933	-2.41613
FBgn0085466	CG34437	159.32	124.45	308.72	102.28	56.886	89.171	-1.25364	4.62317	7.4852e-05	0.001115	-2.38583
FBgn0260964	Vmat	35.167	30.168	27.643	12.272	13.751	12.784	-1.2494	2.05031	9.1148e-05	0.0013235	-2.39591
FBgn0029990	CG2233	18625	21872	27743	8978.4	7456.6	12411	-1.2423	11.4556	2.9957e-08	1.0041e-06	-2.36567
FBgn0037678	CG16749	65.816	22.272	39.912	14.106	23.416	16.343	-1.24095	2.4808	0.0017899	0.01594	-2.37631
FBgn0039911	CG1909	34.221	34.049	41.913	19.939	14.514	11.808	-1.23744	2.27995	5.1372e-05	0.00079302	-2.38177
FBgn0262036	CG42847	172.24	227.75	322.11	113.53	96.773	96.424	-1.23415	4.9109	1.2393e-07	3.6532e-06	-2.35421
FBgn0020508	Ag5r2	867.61	284.01	633.2	194.55	298.82	265.54	-1.23356	6.20719	8.5433e-05	0.0012592	-2.35182
FBgn0032136	CG15828	580.93	572.36	573.9	209.75	190.69	336.55	-1.23085	6.16213	8.5631e-09	3.2483e-07	-2.34357
FBgn0069923	CG41128	69.554	74.919	103.25	45.526	21.811	39.292	-1.2187	3.40272	2.0239e-05	0.0003469	-2.32322
FBgn0034717	CG5819	31.778	13.57	16.399	11.402	6.7332	8.1705	-1.21828	1.52371	0.0055254	0.039977	-2.34729
FBgn0026148	CG12253	17.133	25.366	14.357	11.419	4.9583	8.1336	-1.21054	1.42688	0.003743	0.029471	-2.31962
FBgn0260758	CG42556	22.388	18.476	20.461	7.5311	6.7306	12.528	-1.20258	1.5249	0.0021291	0.018473	-2.28913
FBgn0038795	CG4335	149.67	147.89	233.12	72.755	74.532	83.363	-1.20229	4.48199	1.2221e-07	3.6134e-06	-2.3008
FBgn0029866	CG3842	129.23	123.6	137.06	46.208	53.045	71.45	-1.19705	4.04811	2.6531e-08	8.9537e-07	-2.28403
FBgn0031649	hoe2	35.16	29.189	27.641	13.23	12.825	13.9	-1.19637	2.05181	0.00017056	0.0022867	-2.30234
FBgn0040735	CG16836	239.27	208.23	304.77	103.95	66.999	159.02	-1.19068	4.98357	8.8395e-06	0.00016605	-2.27982
FBgn0036336	ste14	113.3	116.78	148.27	66.296	50.426	50.072	-1.17848	4.00839	5.4724e-08	1.7618e-06	-2.26837
FBgn0031116	CG1695	20.202	13.601	15.355	6.6007	5.917	9.1596	-1.17841	1.25072	0.0058732	0.042049	-2.26772
FBgn0052187	CG32187	17.075	13.601	18.399	4.6694	6.8278	10.243	-1.17625	1.25054	0.0061303	0.043382	-2.25734
FBgn0032010	CG8086	73.596	57.387	67.513	29.304	35.407	22.344	-1.17396	3.10189	3.809e-06	7.7342e-05	-2.28012
FBgn0031248	CG11912	314.85	139.98	360.98	84.859	151.46	125.21	-1.17349	5.10295	0.00013727	0.0018816	-2.25655
FBgn0263093	CR43361	30.973	38.996	22.557	11.295	14.619	15.014	-1.17282	2.06809	0.00072387	0.0077426	-2.2607
FBgn0028999	nerfin-1	78.222	119.76	130.88	55.863	48.87	40.877	-1.1711	3.81284	2.1067e-06	4.5017e-05	-2.25851
FBgn0029856	CG11700	89.791	121.76	83.933	34.866	49.935	46.32	-1.17087	3.66319	1.5115e-06	3.3168e-05	-2.25352
FBgn0052506	CG32506	18.164	19.476	17.4	11.419	5.863	7.0398	-1.16704	1.39541	0.0026563	0.022373	-2.26299
FBgn0043841	vir-1	1830.5	2042.2	2412.1	953.92	877	972.03	-1.16504	8.03992	7.0891e-11	3.5219e-09	-2.24221
FBgn0031064	CG12531	13.969	20.466	18.41	8.5205	5.8796	9.2028	-1.16502	1.34831	0.0047963	0.036079	-2.23892
FBgn0036996	mag	626.37	258.74	471.58	161.49	223.17	222.49	-1.15951	5.83587	1.7487e-05	0.0003043	-2.23452
FBgn0001258	ImpL3	135.76	148.91	183.05	61.366	63.275	85.406	-1.15918	4.31714	7.8439e-08	2.4684e-06	-2.22674
FBgn0065032	Arpc3B	175.18	189.83	181.07	100.38	61.278	83.49	-1.15744	4.53685	1.4533e-08	5.1347e-07	-2.22755
FBgn0052803	CG32803	655.76	623.91	792.75	294.91	298.29	337.35	-1.15563	6.44599	1.3143e-10	6.2746e-09	-2.22709
FBgn0036007	path	402.65	406.87	450.09	172.93	151.32	242.87	-1.15447	5.73255	4.3886e-09	1.7319e-07	-2.22106
FBgn0038348	CG18519	24.553	16.489	30.642	14.257	9.3464	8.2719	-1.15295	1.73459	0.0028265	0.023403	-2.24889
FBgn0010226	GstS1	1351.1	1713.2	1838.3	801.79	694.38	708.91	-1.15261	7.68585	3.7916e-10	1.718e-08	-2.22332
FBgn0030519	CG11151	2769.1	2506.5	3408.5	1205.3	1442.5	1261.1	-1.15138	8.51	3.7567e-10	1.7101e-08	-2.22162
FBgn0029603	CG14053	22.331	17.514	14.351	11.42	6.7712	5.942	-1.14615	1.37906	0.0050122	0.03725	-2.2457
FBgn0259927	CG42450	46.911	34.998	43.979	19.867	15.251	21.895	-1.14456	2.48979	8.1083e-05	0.0011987	-2.20806
FBgn0028532	CG7968	113.87	43.662	80.812	38.805	17.391	51.521	-1.14378	3.36857	0.0032543	0.026387	-2.21269
FBgn0036024	CG18180	385.83	69.833	258.78	113.48	115.89	94.258	-1.14333	4.92282	0.0051049	0.037565	-2.20761
FBgn0033484	CG2269	38.461	37.953	40.911	19.892	11.717	21.825	-1.14325	2.39701	0.0001342	0.0018447	-2.1957
FBgn0033791	Drl-2	21.288	15.55	17.398	8.5133	7.6802	8.1326	-1.14277	1.38156	0.0031014	0.025316	-2.22954
FBgn0037754	CG8500	21.304	18.491	16.387	8.5064	9.4862	7.0562	-1.14253	1.42514	0.0027805	0.023082	-2.2429
FBgn0036926	CG7646	19.305	19.436	30.636	14.264	6.6486	10.451	-1.14181	1.69856	0.0037303	0.029395	-2.21202
FBgn0038419	CG14879	12.916	18.504	20.436	7.5535	7.7006	8.1131	-1.14153	1.32923	0.0042155	0.032537	-2.21918
FBgn0260657	CG42540	22.459	21.393	27.595	7.4937	11.16	13.745	-1.14076	1.73762	0.0015817	0.014508	-2.20524
FBgn0261451	trol	4836.4	4353.1	4360	1933.3	2006.4	2207.4	-1.14034	9.15488	1.3471e-11	7.244e-10	-2.20421
FBgn0041097	robo3	38.352	31.134	29.689	18.021	11.836	15.086	-1.13804	2.16923	0.0003125	0.0037993	-2.20668
FBgn0004428	LysE	103.39	71.001	80.833	25.358	23.508	67.202	-1.13694	3.46816	0.0011398	0.011256	-2.19892
FBgn0039360	CLS	275.63	312.48	322.22	109.5	106.7	199.58	-1.13389	5.27407	1.0611e-06	2.4726e-05	-2.18945
FBgn0085369	CG34340	28.694	17.481	20.474	14.274	7.5693	8.24	-1.13362	1.64584	0.0035293	0.028174	-2.21548
FBgn0053306	CG33306	130.8	50.49	67.572	33.981	27.062	52.742	-1.12794	3.43428	0.0015501	0.014245	-2.18712
FBgn0250819	CG33521	37.561	55.511	58.273	37.126	13.304	18.775	-1.12601	2.74653	0.0012879	0.012456	-2.18691
FBgn0047133	pncr003:2L	174.26	220.98	236.27	98.331	96.012	95.169	-1.12452	4.75313	3.6564e-09	1.4666e-07	-2.18129
FBgn0040732	CG16926	3098.4	5252.6	5327.6	2331.5	2183.2	1767.2	-1.12255	9.17407	5.5996e-07	1.391e-05	-2.17746
FBgn0264006	dysc	31.08	24.251	57.167	20.863	20.744	9.6599	-1.12073	2.3423	0.0045272	0.03432	-2.19436
FBgn0033268	Obp44a	465.96	649.25	881.67	226.66	212.8	478.62	-1.12025	6.40366	0.00021411	0.0027718	-2.17506
FBgn0027359	Tim8	139.02	165.47	203.5	86.102	61.346	86.782	-1.11962	4.44611	3.5251e-07	9.3497e-06	-2.16877
FBgn0038610	CG7675	408.99	365.96	427.58	180.55	160.03	214.21	-1.11837	5.67688	4.0806e-10	1.832e-08	-2.16754
FBgn0017429	CG5989	259.35	179.99	248.56	90.648	107.2	119.21	-1.11775	4.8773	5.2543e-08	1.6971e-06	-2.16963
FBgn0033302	Cyp6a14	38.404	29.156	39.874	18.953	18.08	11.848	-1.11688	2.27896	0.00032051	0.0038726	-2.19787
FBgn0036986	CG5282	12.91	16.542	21.448	6.5871	8.6144	8.1128	-1.11496	1.31235	0.0056915	0.040988	-2.18321
FBgn0038058	CG5608	52.41	66.232	56.276	38.963	18.515	23.374	-1.11125	2.95022	0.00011803	0.0016503	-2.16343
FBgn0038083	CG5999	63.057	77.926	59.366	23.525	21.057	49.042	-1.10517	3.14301	0.00039538	0.0046287	-2.13993
FBgn0053988	CG33988	43.748	33.043	47.027	17.937	19.74	19.705	-1.10319	2.47759	0.00011138	0.0015798	-2.15778
FBgn0046302	CG10650	150.14	52.396	112.51	46.291	42.672	57.697	-1.10183	3.77335	0.0007488	0.0079571	-2.14814
FBgn0002534	Lcp3	260.44	200.46	237.33	109.67	106.27	110.19	-1.09714	4.90456	3.0318e-09	1.2261e-07	-2.14096
FBgn0029708	CG3556	27.791	36.071	22.547	19.025	6.5199	15	-1.09535	2.00109	0.0050686	0.03741	-2.13119
FBgn0032151	nAcRalpha-30D	35.221	16.438	50.023	17.036	16.304	14.031	-1.09328	2.21404	0.0054882	0.039817	-2.1465
FBgn0038242	CG14852	47.324	58.311	136.86	57.001	26.167	30.457	-1.09169	3.41009	0.0058265	0.041776	-2.13417
FBgn0259822	Ca-beta	38.303	26.248	27.641	19.001	9.1667	15.053	-1.09169	2.08559	0.0015843	0.014517	-2.13305
FBgn0263353	CG11000	23.456	16.505	24.531	9.4372	12.118	8.2382	-1.09123	1.61437	0.0037055	0.029268	-2.16464
FBgn0046706	Haspin	47.268	83.763	86.898	42.671	17.428	42.563	-1.08757	3.26376	0.0013016	0.012563	-2.12278
FBgn0015038	Cyp9b1	54.712	73.959	105.26	44.543	30.64	34.886	-1.08608	3.3619	0.00014616	0.0019895	-2.12531
FBgn0261675	Npc1b	480.02	181.84	340.65	141.72	135.16	195.44	-1.08532	5.42564	0.00016564	0.0022268	-2.12252
FBgn0032891	Oseg5	31.86	22.377	16.417	9.4159	11.141	12.674	-1.08207	1.73794	0.0043449	0.033248	-2.12615
FBgn0031294	IA-2	634.15	411.64	607.61	245.75	238.16	297.76	-1.08128	6.1448	1.0689e-07	3.259e-06	-2.11521
FBgn0033221	CG12825	264.94	216.96	390.64	154.2	124.98	133.49	-1.07946	5.22872	1.5021e-06	3.3035e-05	-2.11438
FBgn0052017	CG32017	15.126	23.354	33.689	13.273	10.216	10.503	-1.07843	1.76869	0.0067896	0.047128	-2.12312
FBgn0029969	CG10932	399.43	357.18	471.54	178.61	171.21	232.66	-1.0783	5.71976	1.3029e-08	4.6537e-07	-2.10848
FBgn0050022	CG30022	98.3	81.689	130.86	46.287	48.857	52.109	-1.07677	3.76302	6.1348e-06	0.00011889	-2.11099
FBgn0032219	CG4995	52.37	49.612	63.387	23.592	17.656	37.717	-1.07646	2.88649	0.00027863	0.0034449	-2.09421
FBgn0037975	CG3397	1478.2	1976.1	1969.2	661.56	736.18	1175.2	-1.07614	7.85568	2.9679e-06	6.167e-05	-2.1079
FBgn0033297	Mal-A8	55.311	40.874	29.731	16.964	13.424	29.631	-1.07412	2.51184	0.0024198	0.020634	-2.09794
FBgn0039091	CG10182	152.38	54.333	137.01	50.055	49.583	63.506	-1.07382	3.90504	0.0008531	0.008854	-2.10687
FBgn0031970	CG7227	29.069	69.267	36.872	16.939	18.737	28.627	-1.07254	2.61051	0.0045261	0.03432	-2.10267
FBgn0039157	Myo95E	150.61	124.52	189.17	58.474	78.13	84.398	-1.07131	4.33254	1.9621e-06	4.2484e-05	-2.10089
FBgn0000640	Fbp2	141980	157980	164110	59992	91184	70006	-1.06909	14.2747	3.6766e-08	1.2116e-06	-2.09814
FBgn0000557	Ef1alpha100E	322.66	366.97	426.53	138.79	145.36	249.51	-1.06692	5.58671	2.8502e-06	5.9351e-05	-2.09152
FBgn0264695	Mhc	4400.4	2382.8	3110.9	1714.1	1629.2	1384.3	-1.06525	8.7253	1.7491e-06	3.8041e-05	-2.09284
FBgn0262593	Shab	59.511	31.081	35.839	15.997	23.297	20.854	-1.06477	2.51675	0.0014615	0.013636	-2.102
FBgn0031092	CG9577	2172	1836.8	2175.9	901.82	913.84	1142.2	-1.06448	8.04858	4.0627e-09	1.6163e-07	-2.09094
FBgn0032235	CG5096	41.437	17.432	32.723	18.03	13.661	11.764	-1.06364	2.08233	0.0043361	0.033206	-2.10774
FBgn0038347	CG18522	873.16	506.06	634.28	381.17	287.84	294.89	-1.0621	6.43356	1.4097e-06	3.1286e-05	-2.08891
FBgn0022774	Oat	3176.1	4525.5	3375.9	1477.5	1813.6	2019.2	-1.06088	8.88975	1.1019e-07	3.3409e-06	-2.08604
FBgn0033134	Tsp42El	384.49	389.35	417.36	194.77	169.52	207.43	-1.06073	5.68143	3.6286e-10	1.6595e-08	-2.08354
FBgn0050154	CG30154	112.07	98.289	104.35	52.974	25.016	73.403	-1.0599	3.78767	0.00033297	0.0039887	-2.07876
FBgn0019932	SamDC	121.92	139.17	182.01	81.398	58.846	74.18	-1.04838	4.27408	2.3026e-06	4.8673e-05	-2.06647
FBgn0036335	mRpL20	24.634	33.133	26.61	19.019	11.001	10.616	-1.0447	1.98281	0.0021086	0.018344	-2.07641
FBgn0260798	Gprk1	132.62	143.04	216.76	108.04	42.948	87.953	-1.04357	4.42508	0.00042376	0.0049139	-2.06084
FBgn0029167	Hml	452.84	478.92	481.82	235.43	206.41	244.6	-1.04335	5.93239	5.5651e-10	2.4315e-08	-2.05929
FBgn0039915	CG1732	66.649	149.97	172.77	70.983	68.738	49.136	-1.04171	4.09246	0.00071985	0.0077166	-2.06182
FBgn0259150	CG42265	40.578	44.806	34.812	16.969	21.528	19.719	-1.04043	2.45763	0.00023023	0.0029531	-2.06466
FBgn0034978	CG3257	24.5	19.449	20.469	10.395	10.272	10.45	-1.03908	1.63076	0.003764	0.029565	-2.07019
FBgn0053926	CG33926	333.26	334.82	399.94	73.312	171.47	274.52	-1.03878	5.53144	0.0014773	0.013756	-2.05665
FBgn0013679	mt:ND1	1408.9	1554.5	2621.7	1511.5	358.77	848.2	-1.03865	7.90985	0.0067648	0.047022	-2.0545
FBgn0013342	n-syb	53.424	51.569	60.333	28.384	29.25	22.254	-1.03766	2.89213	3.8496e-05	0.0006067	-2.06947
FBgn0038098	CG7381	357.03	102.97	210.76	103	108.89	114.74	-1.03761	4.86618	0.0016348	0.01487	-2.05358
FBgn0030098	CG12057	238.5	88.434	108.52	82.36	66.769	62.871	-1.03728	4.25134	0.0012624	0.012233	-2.05403
FBgn0058178	CG40178	72.867	107.1	121.67	70.228	25.035	52.104	-1.03395	3.73522	0.0011853	0.011635	-2.04684
FBgn0010105	comm	25.677	27.248	30.673	14.19	15.532	10.614	-1.03335	1.97127	0.0013482	0.012885	-2.07254
FBgn0260793	2mit	41.677	46.744	40.933	16.943	25.05	20.9	-1.03327	2.55906	0.00022341	0.002877	-2.05673
FBgn0030501	BthD	24.493	17.489	21.482	8.4659	14.841	7.1518	-1.02999	1.61063	0.0059326	0.042319	-2.08361
FBgn0040636	CG13255	100.25	68.061	94.093	47.326	33.997	47.401	-1.02885	3.54085	3.2687e-05	0.00052703	-2.0385
FBgn0260400	elav	198.93	259.88	362.01	153.27	120.68	128.87	-1.02651	5.15872	5.9703e-06	0.00011663	-2.03768
FBgn0028993	scro	36.384	38.922	47.024	23.699	20.596	15.321	-1.02383	2.48465	0.0003168	0.003842	-2.05197
FBgn0262509	nrm	44.959	51.584	60.318	38.024	20.338	18.88	-1.0151	2.82867	0.00066993	0.0072689	-2.03077
FBgn0030157	CG1468	134.95	235.59	288.36	87.775	96.662	141.98	-1.01408	4.84989	0.00020071	0.0026262	-2.01858
FBgn0042112	mRpL36	125.96	87.508	143.15	77.73	52.1	46.78	-1.00944	3.97704	7.0655e-05	0.001059	-2.01924
FBgn0085419	Rgk2	50.139	32.039	57.231	17.875	19.56	32.027	-1.00844	2.67068	0.0023739	0.020327	-2.00698
FBgn0011824	CG4038	22.372	21.428	15.378	8.4771	9.4004	11.504	-1.008	1.53373	0.0072723	0.049842	-2.01412
FBgn0036494	Toll-6	20.382	24.329	29.634	10.356	14.702	11.651	-1.00631	1.8273	0.0042882	0.032949	-2.02525
FBgn0263659	CR43650	57.778	64.231	77.701	42.686	26.315	30.291	-1.0062	3.16657	0.00011958	0.0016683	-2.01134
FBgn0037842	CG6567	137.85	120.62	195.29	83.266	68.419	74.285	-1.00475	4.32102	9.1789e-06	0.0001721	-2.00805
FBgn0045800	Uhg1	27.804	27.236	33.733	21.892	7.3629	15.072	-1.00389	2.06345	0.0050126	0.03725	-2.00269
FBgn0030871	CG8142	100.36	100.27	93.109	56.818	50.634	38.634	-0.99916	3.70602	4.5415e-06	9.0896e-05	-2.01073
FBgn0031034	CG14205	241.8	65.987	160.6	67.022	77.139	90.173	-0.99818	4.36768	0.0042875	0.032949	-1.9988
FBgn0259209	Mlp60A	347.14	377.69	378.5	179.6	188.68	184.46	-0.99671	5.59178	9.3783e-10	4.0434e-08	-1.99611
FBgn0028996	onecut	71.649	85.681	83.874	46.403	34.072	40.604	-0.99545	3.43426	1.5815e-05	0.00027889	-1.99212
FBgn0035169	CG13890	761.46	640.41	966.63	363.9	409.94	414.03	-0.99543	6.68915	2.4705e-07	6.9082e-06	-1.99391
FBgn0030051	spirit	1166.2	1145.7	1275.6	552.03	600.2	650.57	-0.993	7.28759	5.1435e-09	1.9897e-07	-1.98996
FBgn0036337	CG11255	1425.8	1584.7	1775.9	637	694.18	1079	-0.99028	7.70384	4.9117e-06	9.7506e-05	-1.98591
FBgn0023516	Pex5	674.74	489.54	606.62	261.76	220.61	410.74	-0.9886	6.27409	2.0354e-05	0.00034765	-1.98285
FBgn0038020	GstD9	102.56	103.17	113.53	62.496	51.369	46.638	-0.98707	3.82836	2.0117e-06	4.3271e-05	-1.98912
FBgn0052191	CG32191	249.81	206.31	239.37	146.74	93.913	110.35	-0.98591	4.93518	1.1194e-06	2.5962e-05	-1.98144
FBgn0038653	CG18208	33.114	31.131	35.791	16.053	18.964	15.18	-0.98248	2.22631	0.00078263	0.008274	-1.99287
FBgn0039054	CG13830	34.126	30.165	29.679	14.145	19.932	12.925	-0.98123	2.14159	0.0013961	0.013214	-1.99928
FBgn0022770	Peritrophin-A	34.018	18.434	26.597	13.23	13.732	12.801	-0.97962	1.91367	0.0061829	0.043644	-1.988
FBgn0010314	Cks30A	33.279	51.632	49.082	20.763	17.784	29.805	-0.97923	2.62892	0.0013531	0.012907	-1.96034
FBgn0263456	nwk	30.949	26.255	31.701	17.054	10.934	17.284	-0.97725	2.07424	0.0021576	0.018687	-1.9638
FBgn0039927	CG11155	77.9	59.317	80.785	46.46	26.197	38.24	-0.97589	3.29867	0.00022552	0.0029003	-1.96581
FBgn0039897	CG1674	66.455	106.16	103.28	49.187	38.308	53.144	-0.97586	3.63015	0.00011384	0.001604	-1.96172
FBgn0037525	CG17816	101.43	78.773	115.54	48.189	48.825	53.265	-0.97583	3.72553	1.7505e-05	0.0003043	-1.96796
FBgn0263476	snoRNA:CG32479-b	132.99	78.809	51.267	34.858	48.127	50.823	-0.97389	3.56129	0.0026711	0.02244	-1.966
FBgn0027570	Nep2	365.08	305.62	301.81	154.99	143.76	197.88	-0.97225	5.42034	1.6009e-07	4.6355e-06	-1.95822
FBgn0038181	CG9297	197.49	158.61	198.43	105.97	109.2	66.73	-0.96906	4.61563	6.1666e-06	0.00011921	-1.96712
FBgn0263995	cpo	89.585	80.8	65.521	32.991	43.848	43.952	-0.96445	3.41226	6.1369e-05	0.00093264	-1.95301
FBgn0264001	bru-3	44.015	56.424	87.864	36.939	27.237	32.482	-0.9612	3.1001	0.0014163	0.013329	-1.94814
FBgn0263246	CG43389	23.498	25.322	21.498	15.191	10.18	10.537	-0.96096	1.76922	0.005984	0.042655	-1.95828
FBgn0039094	CG10184	238.13	201.43	262.86	123.87	104.33	133.17	-0.96072	4.95873	4.2153e-07	1.0857e-05	-1.94377
FBgn0259108	futsch	211.43	159.54	253.62	108.73	103.67	109.02	-0.95754	4.79121	3.3291e-06	6.8546e-05	-1.94322
FBgn0050029	CR30029	119.52	113.9	95.181	71.07	41.592	56.842	-0.95629	3.88128	3.2146e-05	0.00052175	-1.9386
FBgn0259994	CG42492	80.192	90.528	98.179	48.236	40.977	49.769	-0.95481	3.60034	1.4503e-05	0.00025713	-1.93478
FBgn0261673	nemy	268.08	247.2	314	149.41	132.74	146.12	-0.95349	5.19776	9.3069e-08	2.8825e-06	-1.93635
FBgn0039697	CG7834	1135.1	808.8	1173.3	552.14	516.93	542.89	-0.9512	7.09918	5.265e-07	1.3145e-05	-1.93379
FBgn0064237	Idgf5	456.03	418.52	527.81	248.66	195.91	282.62	-0.94922	5.95249	5.4393e-07	1.3546e-05	-1.92846
FBgn0052813	CG32813	71.454	64.246	55.278	22.541	41.491	34.74	-0.94675	3.12273	0.00034339	0.0041035	-1.93352
FBgn0026197	noe	865.1	877.01	1084.3	424.35	479.25	564.52	-0.94557	6.96054	3.8401e-07	1.0076e-05	-1.92519
FBgn0027111	miple	40.592	23.256	59.228	20.785	24.132	18.701	-0.94444	2.51867	0.0071819	0.049326	-1.93461
FBgn0046692	Stlk	81.475	114.84	171.72	79.58	42.322	69.441	-0.94409	4.04544	0.0014516	0.013573	-1.92343
FBgn0028408	Drep-2	34.187	32.102	37.833	24.707	17.994	10.799	-0.94275	2.29171	0.0025798	0.021822	-1.94621
FBgn0264542	CG43921	105.63	76.828	104.32	44.367	51.493	53.252	-0.94187	3.69318	3.3446e-05	0.00053575	-1.92324
FBgn0032373	Vha100-5	74.496	32.002	62.375	20.67	28.249	38.995	-0.94127	2.95442	0.0059931	0.042689	-1.92089
FBgn0032820	fbp	843.49	690.11	718.16	344.96	332.31	496.89	-0.94056	6.63554	2.4317e-06	5.1181e-05	-1.91776
FBgn0021765	scu	3345.7	2746.9	3824.9	1523.9	1846.3	1798	-0.94027	8.77036	4.3422e-07	1.1125e-05	-1.91895
FBgn0034162	CG6426	37.348	29.158	39.871	16.987	21.586	16.359	-0.94019	2.32158	0.0016598	0.015056	-1.93652
FBgn0039050	CG17110	88.96	166.55	148.3	83.323	50.974	76.398	-0.94008	4.17868	0.00040032	0.0046753	-1.91656
FBgn0032281	CG17107	117.09	62.212	70.632	48.274	46.393	35.11	-0.93916	3.49932	0.00069644	0.0074984	-1.92587
FBgn0030607	dob	169.76	138.16	181.03	81.268	85.75	88.102	-0.9375	4.44947	1.3934e-06	3.1065e-05	-1.91655
FBgn0037070	CG11309	548.9	449.63	648.5	293.09	277.72	291.15	-0.93389	6.18777	3.9806e-07	1.0361e-05	-1.9108
FBgn0003965	v	165.7	207.36	218.88	108.76	86.267	115.75	-0.93288	4.7248	2.5373e-06	5.3289e-05	-1.90471
FBgn0262782	Mdh1	5281.8	4319.9	5534.3	2445.7	2431.5	3052.8	-0.93271	9.3826	3.8816e-07	1.0157e-05	-1.9087
FBgn0019661	roX1	101.6	110.94	146.21	79.59	73.161	34.416	-0.93233	4.0108	0.00065571	0.0071384	-1.91674
FBgn0033130	Tsp42Ei	67.457	99.348	86.948	38.687	49.023	45.223	-0.9316	3.52583	8.8878e-05	0.0012964	-1.90888
FBgn0028540	CG9008	55.678	80.856	66.501	32.092	34.24	40.411	-0.93108	3.21629	0.00024026	0.0030617	-1.90209
FBgn0031645	CG3036	149.87	216.07	321.06	118.16	77.331	164.98	-0.93035	4.93717	0.0016505	0.014984	-1.90584
FBgn0017482	T3dh	150.68	142.05	209.62	86.966	61.176	116.46	-0.92834	4.49289	0.00017839	0.0023689	-1.89851
FBgn0039801	Npc2h	42.645	30.122	41.923	17.922	15.204	27.453	-0.92819	2.4321	0.0034848	0.027864	-1.89323
FBgn0002773	Mlc2	9477.4	6700.9	8256.5	4695	4485.4	3669.7	-0.92704	10.0751	1.1081e-06	2.5759e-05	-1.90153
FBgn0261259	Fhos	426.94	368.93	287.54	169.13	199.03	201.71	-0.9267	5.58936	1.208e-06	2.7495e-05	-1.90115
FBgn0028481	CG4341	36.315	37.972	34.793	20.827	18.84	17.496	-0.92488	2.36259	0.0009729	0.0099185	-1.90823
FBgn0030251	CG2145	1203.5	973.32	1388.1	659.94	655.2	565.24	-0.92222	7.30216	8.0097e-07	1.9308e-05	-1.89585
FBgn0016126	CaMKI	2582.4	3020.5	4091.8	2126.5	1553.4	1441.3	-0.92061	8.74435	2.5013e-05	0.00041632	-1.89305
FBgn0039213	atl	1355.2	1413.4	1433.2	782.84	739.96	700.85	-0.91774	7.54052	3.3309e-08	1.1088e-06	-1.8896
FBgn0039798	CG11313	1617.9	1440.6	1888.4	925.6	738.72	955.62	-0.91725	7.77605	9.1115e-07	2.1644e-05	-1.88817
FBgn0029118	Sucb	1239.8	1113.5	1214.3	632.47	538.96	722.3	-0.91438	7.30647	2.9071e-07	7.9032e-06	-1.8839
FBgn0004880	scrt	89.737	79.769	108.38	48.2	46.199	53.233	-0.91328	3.65961	3.7798e-05	0.00059762	-1.88229
FBgn0004117	Tm2	1141.5	929.56	1033.2	661.03	507.4	480.63	-0.91196	7.1065	1.1755e-06	2.6879e-05	-1.88244
FBgn0035147	Gale	6306.7	3940.3	4974.8	3410.3	2679.5	2019.3	-0.90839	9.39903	7.3875e-05	0.0011032	-1.87713
FBgn0040056	CG17698	127.34	151.81	231.06	112.68	75.118	84.838	-0.90349	4.52191	0.00024946	0.0031503	-1.8714
FBgn0028563	sut1	752.89	715.42	821.43	477.59	396.06	349.58	-0.90344	6.67148	6.1144e-07	1.5035e-05	-1.87188
FBgn0027866	CG9776	979.98	566.4	761.11	498.43	396.9	339.23	-0.90154	6.68326	5.4816e-05	0.00084486	-1.86908
FBgn0050035	Tret1-1	2712.4	2600	2586.1	1187.3	1497.3	1549.6	-0.89961	8.45636	2.7473e-07	7.5528e-06	-1.86541
FBgn0004919	gol	117.44	110.96	113.55	65.274	72.338	44.569	-0.8981	3.95317	2.7173e-05	0.00044848	-1.87698
FBgn0002535	Lcp4	1857	1596.4	1735	955.82	879.59	950.04	-0.89735	7.8515	1.0176e-07	3.1122e-06	-1.86268
FBgn0037440	CG1041	491.26	443.82	567.7	295.05	225.12	287.52	-0.89657	6.06949	1.1277e-06	2.6029e-05	-1.86059
FBgn0023441	fus	821.04	687.21	644.53	369.6	410.86	379.41	-0.89153	6.58706	4.3151e-07	1.1084e-05	-1.85605
FBgn0033928	Arc2	140.97	115.76	165.66	99.49	60.509	67.514	-0.89091	4.25742	0.00012007	0.0016716	-1.85655
FBgn0011286	Rya-r44F	71.365	41.774	60.346	29.276	32.634	31.325	-0.89065	3.00767	0.0010712	0.010709	-1.86073
FBgn0030706	CG8909	54.339	33.998	50.107	22.649	29.346	22.177	-0.8897	2.69608	0.0020726	0.018079	-1.86653
FBgn0051997	CG31997	44.897	46.716	51.133	23.598	18.561	35.488	-0.88943	2.74517	0.0021396	0.018548	-1.8384
FBgn0040007	RpL38	2443.5	2579.5	3439.2	1827.7	777.39	1963.1	-0.88936	8.55929	0.0018466	0.016355	-1.85242
FBgn0033010	Atf6	316.42	401.98	602.38	317.97	191.61	203.39	-0.88908	5.88639	0.00046943	0.0053798	-1.8525
FBgn0050109	CG30109	25.834	44.817	44.976	22.72	17.86	21.994	-0.88731	2.45703	0.0051992	0.038144	-1.84784
FBgn0052350	CG32350	87.884	124.57	181.96	84.267	57.098	71.912	-0.88707	4.1627	0.00096443	0.0098595	-1.8493
FBgn0015037	Cyp4p1	166.73	177.13	226.01	123.05	80.164	105.52	-0.88549	4.68613	2.8486e-05	0.00046778	-1.84583
FBgn0263397	Ih	140.96	123.57	156.48	73.716	80.705	73.17	-0.88403	4.25464	4.8803e-06	9.7081e-05	-1.84985
FBgn0013563	Pex1	132.41	122.63	135.02	80.453	61.501	69.641	-0.88215	4.14825	6.6074e-06	0.0001268	-1.84343
FBgn0085413	CG34384	44.833	34.012	51.108	14.988	32.12	23.229	-0.87785	2.61465	0.0048096	0.036079	-1.84758
FBgn0038975	Nrx-1	46.809	27.193	35.811	16	19.702	24.148	-0.87479	2.38843	0.0062116	0.043767	-1.8348
FBgn0040281	Aplip1	26.799	33.1	36.801	21.823	13.515	17.421	-0.87428	2.21966	0.0054633	0.039713	-1.83286
FBgn0261788	Ank2	458.02	370.82	423.51	224.04	218.54	241.15	-0.87338	5.81576	2.6355e-07	7.2864e-06	-1.83164
FBgn0051274	CG31274	64.206	81.792	80.798	33.936	37.59	52.918	-0.87269	3.39127	0.00041886	0.0048686	-1.82247
FBgn0036813	Aut1	211.4	210.27	186.22	107.75	105.36	119.32	-0.87233	4.78284	9.6703e-07	2.2806e-05	-1.82863
FBgn0034259	P32	125.13	136.23	198.35	80.326	66.496	105.03	-0.87139	4.38645	0.00029534	0.0036131	-1.82532
FBgn0039941	CG17167	42.703	35.979	46.011	28.461	19.572	19.868	-0.87032	2.56156	0.0024824	0.021084	-1.83639
FBgn0037130	Syn1	41.692	42.819	48.061	28.431	16.829	27.683	-0.86799	2.64973	0.0024476	0.020848	-1.81747
FBgn0031453	CG9894	1205.8	1160.2	1674.5	838.7	645.32	735.51	-0.86429	7.50299	1.3053e-05	0.00023398	-1.82043
FBgn0033129	Tsp42Eh	214.4	143.99	164.72	112.63	96.028	78.123	-0.86259	4.5699	5.6602e-05	0.00086154	-1.82407
FBgn0035679	CG10467	286.44	352.36	447.97	223.22	157.29	217.86	-0.86215	5.61691	3.7058e-05	0.00058782	-1.81622
FBgn0032684	CG10178	251.05	230.63	336.47	218.79	136.12	94.804	-0.86165	5.20933	0.0010692	0.0107	-1.81927
FBgn0033250	CG14762	37.435	43.821	40.92	22.69	21.379	23.176	-0.86105	2.53937	0.0015473	0.014245	-1.81688
FBgn0086661	snoRNA:Psi28S-2566	548.47	380.57	292.68	219.31	261.05	191.79	-0.86052	5.78399	0.00015676	0.0021191	-1.81763
FBgn0004191	snRNA:U2:34ABa	2398.1	1862.1	1246.1	894.23	1277.5	861.21	-0.86018	7.95016	0.0003977	0.0046502	-1.8155
FBgn0263994	CG43737	33.137	34.063	36.816	26.613	16.142	14.174	-0.85948	2.31952	0.0052848	0.038686	-1.82712
FBgn0034270	CG6401	62.923	51.562	55.249	31.193	28.163	34.666	-0.85366	2.99263	0.00060843	0.0067285	-1.80526
FBgn0264607	CaMKII	252.32	332.89	442.83	209.97	166.92	192.55	-0.8526	5.54035	6.7682e-05	0.0010175	-1.80535
FBgn0037697	CG9363	82.381	99.289	113.5	46.228	52.223	65.762	-0.8503	3.7677	0.00020948	0.0027263	-1.79748
FBgn0034628	Acox57D-p	633.15	477.86	620.92	409.62	267.98	284.53	-0.84747	6.28998	4.3636e-05	0.0006833	-1.8001
FBgn0263218	Dscam2	93.872	78.823	78.79	52.062	45.396	41.936	-0.84591	3.54055	0.00012192	0.0016925	-1.80413
FBgn0033005	CG3107	259.82	343.59	488.85	240.3	169.39	198.44	-0.84489	5.62977	0.00025686	0.0032229	-1.7961
FBgn0262954	Rpb12	44.002	64.258	75.638	33.072	22.736	47.004	-0.84485	3.10865	0.0058979	0.04211	-1.78868
FBgn0031561	CG16712	1225.8	656.87	1429	511.3	485.64	849.18	-0.84288	7.22419	0.0026798	0.022477	-1.79385
FBgn0034275	CG5002	109.94	94.385	107.4	64.355	50.366	59.137	-0.84269	3.8455	4.8246e-05	0.0007483	-1.79299
FBgn0260943	Rbp6	95.22	136.34	117.64	82.428	59.872	52.569	-0.8384	4.00636	0.00029513	0.0036131	-1.79197
FBgn0039889	CG2219	103.86	153.83	171.79	93.713	83.231	63.077	-0.83594	4.29996	0.0003944	0.0046228	-1.78934
FBgn0034354	CG5224	366.09	262.75	306.9	186.3	162.75	175.18	-0.83526	5.41126	4.4673e-06	8.9594e-05	-1.78498
FBgn0264308	CG43778	60.825	64.282	46.085	28.304	29.919	38.029	-0.8348	3.0122	0.0013828	0.013101	-1.77858
FBgn0033204	CG2065	35.255	31.116	40.89	22.736	21.498	15.321	-0.83436	2.36776	0.0039424	0.030622	-1.80104
FBgn0037166	CG11426	63.883	42.783	46.059	33.159	32.751	18.971	-0.83359	2.84928	0.0037922	0.029715	-1.79928
FBgn0004595	pros	2721	2573.7	2943.1	1667.8	1613.8	1340.3	-0.83343	8.54022	1.4778e-06	3.2574e-05	-1.78234
FBgn0038129	CG8449	716.32	597.67	484.97	248.4	348.2	414.66	-0.83145	6.35077	0.00014961	0.002028	-1.77893
FBgn0037391	CG2017	399.26	314.35	362.14	200.41	222.31	182.39	-0.82729	5.61301	2.1503e-06	4.585e-05	-1.77778
FBgn0263199	Galk	597.98	510.99	614.79	329.01	267.1	376.58	-0.82674	6.29139	1.0548e-05	0.00019478	-1.77216
FBgn0039883	RhoGAP100F	114.16	85.598	108.42	56.706	69.792	46.755	-0.82195	3.83328	0.00023645	0.003025	-1.77877
FBgn0037354	CG12171	244.5	188.76	265.92	127.6	122.45	145.93	-0.82122	5.00027	2.1365e-05	0.0003624	-1.7657
FBgn0036449	bmm	381.14	299.74	369.28	194.73	178.98	221.28	-0.82093	5.58239	4.0783e-06	8.2639e-05	-1.765
FBgn0038858	CG5793	145.37	150.84	201.45	105.98	65.454	110.97	-0.82061	4.51698	0.00039055	0.0045831	-1.76223
FBgn0083167	Neb-cGP	358.91	344.53	461.29	224.07	197.83	238.76	-0.81901	5.73143	7.0192e-06	0.00013417	-1.76298
FBgn0034636	CG10440	93.044	138.33	93.138	47.122	58.208	79.484	-0.81635	3.91339	0.0012464	0.012138	-1.75588
FBgn0000108	Appl	129.38	156.72	175.9	79.342	78.683	105.14	-0.81618	4.41341	9.3145e-05	0.0013485	-1.75555
FBgn0262117	IntS3	116.6	146.01	170.78	92.739	73.536	80.108	-0.81484	4.32153	0.00011227	0.0015878	-1.75901
FBgn0002789	Mp20	548.93	593.81	537.09	289.2	265.4	401.81	-0.81453	6.25904	2.2715e-05	0.00038329	-1.75639
FBgn0016131	Cdk4	72.737	87.621	91.021	42.476	44.474	56.537	-0.81404	3.55514	0.00036666	0.0043445	-1.75193
FBgn0053547	Rim	86.373	59.308	79.776	38.706	34.885	55.211	-0.81241	3.40263	0.0018179	0.01615	-1.75042
FBgn0004169	up	2260.4	1570	1629.7	1226.4	1041.8	840.44	-0.81225	7.95514	8.9558e-05	0.0013043	-1.75643
FBgn0086687	desat1	3608.5	2858.8	4677	2092.2	1802	2453.1	-0.81219	8.98371	0.00011967	0.0016683	-1.75575
FBgn0000116	Argk	7010.4	4580.8	4826.5	2968.5	3367.4	3024.4	-0.81053	9.54288	4.3768e-05	0.00068428	-1.75397
FBgn0033945	CG12868	83.628	124.58	178.89	74.692	67.58	78.756	-0.80885	4.16386	0.0020026	0.017563	-1.75135
FBgn0085447	sif	88.524	53.434	93.036	38.683	49.9	45.234	-0.80855	3.4589	0.0020168	0.017671	-1.75608
FBgn0086672	snoRNA:Or-aca5	321.11	276.49	151.54	166.53	104.91	157.53	-0.80455	5.10464	0.0025454	0.02155	-1.74637
FBgn0004028	wupA	1049.6	873.1	997.4	656.28	529.77	485.28	-0.80434	7.05668	1.1668e-05	0.00021255	-1.74717
FBgn0042175	CG18858	35.308	35.994	45.996	24.615	20.481	22.07	-0.80184	2.50335	0.0043291	0.033179	-1.74639
FBgn0036717	CG13731	84.486	86.593	119.61	65.34	52.194	48.944	-0.80077	3.76081	0.00055128	0.0061521	-1.74611
FBgn0011305	Rsf1	141.24	203.46	234.18	106.8	107.1	119.33	-0.79798	4.73967	0.00017669	0.0023527	-1.73718
FBgn0263072	CG43347	124.91	115.82	119.69	42.298	71.214	94.385	-0.79689	4.06783	0.0015963	0.014601	-1.73365
FBgn0025712	CG13920	47.979	36.951	43.985	25.536	23.07	25.496	-0.79615	2.63321	0.0030262	0.024784	-1.7397
FBgn0022355	Tsf1	3417.3	3253.1	3640.8	1335.5	2216.8	2390.3	-0.79509	8.87791	0.00023795	0.0030373	-1.73513
FBgn0039674	CG1907	770.97	596.61	849.02	465.22	396.82	415.38	-0.79478	6.66375	2.2513e-05	0.00038054	-1.73522
FBgn0037846	CG6574	61.918	48.611	69.521	37.86	35.168	30.344	-0.79316	3.09256	0.0014294	0.013439	-1.74177
FBgn0040005	CG17883	176.48	223.86	306.78	194.17	94.548	119.78	-0.79134	5.02678	0.0031227	0.025453	-1.73102
FBgn0026199	myo	197.84	233.57	361.99	217.81	112.62	129.15	-0.78728	5.19265	0.0036585	0.028946	-1.72636
FBgn0052249	CG32249	125.84	88.516	106.39	62.396	65.245	58.132	-0.78296	3.90496	0.00024561	0.0031096	-1.72655
FBgn0051075	CG31075	28579	32511	30187	17727	16963	18365	-0.78278	12.0275	2.2311e-06	4.7365e-05	-1.72042
FBgn0034497	CG9090	47.968	34.017	44.998	22.654	28.463	22.164	-0.78249	2.61493	0.0046745	0.035273	-1.73282
FBgn0083010	snoRNA:Psi28S-1135c	199.31	142.1	97.294	86.032	105.05	64.309	-0.77712	4.35078	0.0035831	0.028499	-1.71777
FBgn0027608	CG2082	81.978	53.49	53.238	32.077	39.541	38.23	-0.77706	3.16438	0.0036399	0.028869	-1.71788
FBgn0035246	CG13928	221.18	257.97	267.99	141.78	132.7	163.29	-0.77382	5.11297	2.0801e-05	0.00035467	-1.7067
FBgn0024989	CG3777	83.358	95.418	87.982	47.21	46.112	63.425	-0.77375	3.6534	0.0005171	0.0058439	-1.70184
FBgn0030421	CG3812	72.673	68.097	90.994	58.79	29.516	47.489	-0.77344	3.45444	0.0036537	0.028931	-1.70672
FBgn0011666	msi	150.88	225.86	260.78	115.28	114.73	143.49	-0.77317	4.8865	0.00054099	0.0060649	-1.70688
FBgn0010482	l(2)01289	129.25	128.48	140.13	93.742	71.003	67.551	-0.77305	4.21396	0.00010479	0.0014951	-1.71273
FBgn0037635	CG9837	733.68	782.64	734.51	379.92	488.16	448.89	-0.77296	6.69384	8.7179e-06	0.00016408	-1.7091
FBgn0003141	pr	219.31	376.76	427.51	208.97	211.05	178.93	-0.77242	5.56265	0.00074391	0.0079138	-1.70896
FBgn0035309	CG15879	64.029	60.35	56.283	42.647	25.358	38.175	-0.7707	3.10905	0.0025857	0.021853	-1.70147
FBgn0003373	Sgs3	2868.6	3735	3696	1889.8	1697.3	2456.3	-0.76939	8.88583	9.4415e-05	0.0013609	-1.70427
FBgn0039685	Obp99b	230750	197320	241140	107390	143970	141430	-0.7687	14.9068	3.258e-05	0.00052616	-1.70373
FBgn0003890	betaTub97EF	126.89	94.378	97.212	54.752	45.862	87.38	-0.76572	3.90499	0.0027795	0.023082	-1.6941
FBgn0052115	CG32115	167.96	211.19	320.05	147.54	114.54	149.44	-0.76544	5.02065	0.0013617	0.012977	-1.69907
FBgn0030796	CG4829	105.86	160.74	101.33	74.706	86.09	54.986	-0.76537	4.1059	0.0016154	0.014734	-1.7051
FBgn0038344	CG5205	422.81	446.85	320.27	221.17	226.28	253.84	-0.76362	5.78227	2.9372e-05	0.0004799	-1.69677
FBgn0030294	Pa1	90.777	85.638	96.144	62.497	46.954	51.134	-0.7619	3.68487	0.00036321	0.0043088	-1.69729
FBgn0041607	asparagine-synthetase	2374	2126.8	2708.8	1730.3	1285.9	1246.3	-0.75803	8.37567	7.5276e-05	0.0011197	-1.6914
FBgn0036782	CG7320	337.82	444.8	707.72	391.71	256.06	233.72	-0.75728	6.10713	0.0044699	0.034017	-1.69071
FBgn0000044	Act57B	7390.5	4743.3	5305.2	3266.3	4076	2994.5	-0.75442	9.65053	0.00028681	0.0035309	-1.68708
FBgn0022893	Df31	1340.5	1733.7	1934.4	1059.9	759.96	1151.5	-0.75364	7.85265	0.00031546	0.0038305	-1.68563
FBgn0036759	CG5577	395.17	353.28	485.85	233.47	213.19	288.38	-0.74936	5.84034	8.6117e-05	0.0012655	-1.67923
FBgn0015558	tty	87.349	53.463	67.526	41.598	45.587	36.163	-0.74873	3.31099	0.0033389	0.026903	-1.68903
FBgn0033437	CG12926	752.07	1102	1034.2	570.07	496.98	652.72	-0.74861	7.06199	0.00015757	0.0021271	-1.67945
FBgn0037814	CG6325	164.38	135.26	156.51	82.179	104.04	84.829	-0.74647	4.41702	0.00011326	0.0015995	-1.68291
FBgn0036547	CG17032	139.66	87.522	112.53	60.433	66.855	75.191	-0.74631	4.00105	0.0010118	0.01023	-1.67776
FBgn0031908	CG5177	442.22	533.47	481.83	279.8	268.19	322.2	-0.74555	6.08027	1.6793e-05	0.00029348	-1.67494
FBgn0052230	CG32230	313.15	357.19	537.95	303.72	150.94	266.53	-0.74482	5.81103	0.004311	0.033066	-1.67541
FBgn0027945	ppl	872.66	1159.4	1054.7	621.13	665.58	558.27	-0.742	7.15962	3.889e-05	0.00061093	-1.67306
FBgn0042138	CG18815	269.21	237.43	375.33	178.69	178.37	170.62	-0.74006	5.36115	0.00017635	0.0023514	-1.67141
FBgn0058045	CG40045	329.18	428.3	527.77	315.98	180.24	273.61	-0.74006	5.90149	0.0013786	0.013086	-1.66952
FBgn0260945	Atg1	504.04	552.95	439.93	287.36	272.44	338.39	-0.73828	6.12124	3.3341e-05	0.00053557	-1.6666
FBgn0038943	CG5391	96.244	133.43	104.37	41.36	68.636	90.924	-0.73625	3.98269	0.005823	0.041776	-1.66257
FBgn0011828	Pxn	3501.5	2489.9	3254.1	2350.5	1816.9	1417.1	-0.72709	8.74572	0.00073552	0.0078501	-1.65556
FBgn0001325	Kr	437.89	410.73	514.51	348.16	270.91	203.68	-0.72659	5.98986	0.00041553	0.0048414	-1.6568
FBgn0032123	Oatp30B	560.66	510.02	628.07	386.79	322.24	318.06	-0.72524	6.30692	4.9502e-05	0.00076658	-1.65394
FBgn0259716	CG42370	1954.3	2276.9	2024.5	1123	1224.3	1440.4	-0.72414	8.18404	4.355e-05	0.00068305	-1.65158
FBgn0021776	mira	69.418	73.021	65.489	43.505	45.563	36.183	-0.72409	3.3179	0.0013655	0.012987	-1.66009
FBgn0035285	CG12025	275.65	267.63	383.52	193.83	178.23	189.08	-0.7238	5.43859	0.00012222	0.0016943	-1.65164
FBgn0260008	Ucrh	170.03	235.6	243.43	119.04	115.5	159.57	-0.72298	4.9312	0.00057012	0.0063479	-1.6469
FBgn0262116	CG40127	216.01	254.97	411.08	233.79	125.4	175.22	-0.72296	5.36819	0.0061473	0.043471	-1.65053
FBgn0045980	niki	230.38	130.32	189.24	101.08	114.08	118.19	-0.72119	4.6936	0.0010925	0.010888	-1.64974
FBgn0002531	Lcp1	861.16	442.79	432.82	421.84	345.5	285.88	-0.72115	6.34024	0.0055483	0.040075	-1.64901
FBgn0262057	Spn77Ba	229.79	266.7	335.46	200.59	117.68	187.65	-0.71913	5.28655	0.0012453	0.012138	-1.64443
FBgn0032913	CG9259	114.49	191.89	136.09	127	71.639	70.062	-0.71839	4.38585	0.007005	0.048348	-1.6467
FBgn0050118	CG30118	347.7	173.13	241.45	169.3	162.16	131.45	-0.71759	5.16039	0.0026262	0.022156	-1.64671
FBgn0022984	qkr58E-3	82.441	113.91	123.73	71.919	49.322	73.985	-0.71749	3.9298	0.0024577	0.020898	-1.63954
FBgn0036202	CG6024	66.229	64.228	71.593	41.602	38.489	42.862	-0.7171	3.28301	0.0017192	0.015465	-1.64331
FBgn0262362	CG43060	507.57	914.19	665.98	378.05	439.96	452.24	-0.71704	6.60679	0.00094156	0.0096946	-1.64357
FBgn0260965	CG42588	53.522	75.989	60.371	36.843	46.591	31.597	-0.71585	3.19501	0.0048346	0.036174	-1.6507
FBgn0014391	sun	388.77	333.8	492.99	245.8	193.28	302.17	-0.71509	5.83121	0.00064191	0.0070115	-1.63988
FBgn0015777	nrv2	811.54	607.31	886.86	631.88	422.46	352.18	-0.71245	6.75085	0.0019475	0.017125	-1.6393
FBgn0038294	Mf	918.44	851.68	1084.3	608.88	677.81	455.35	-0.71134	7.05824	0.00027595	0.0034274	-1.63855
FBgn0002521	pho	116.71	163.52	220.85	115.44	76.684	114.58	-0.70967	4.56682	0.0046856	0.03533	-1.63376
FBgn0039349	Ssadh	486.93	467.23	466.49	297.82	251.77	319.9	-0.70966	6.05688	3.2504e-05	0.00052581	-1.63389
FBgn0000617	e(y)1	127.05	135.34	105.42	62.278	86.008	76.536	-0.70851	4.12717	0.00067844	0.007345	-1.63601
FBgn0259246	brp	110.97	85.603	106.38	71.956	57.316	55.871	-0.70655	3.85291	0.00091729	0.0094775	-1.63632
FBgn0033782	sug	353.12	200.41	261.9	193.95	168.94	136.18	-0.70598	5.26103	0.0015645	0.014364	-1.6339
FBgn0039156	CG6178	813.59	541.1	819.36	382.75	401.03	550.35	-0.70494	6.66965	0.0010405	0.010445	-1.62956
FBgn0053080	CG33080	258.13	178.08	173.96	121.93	122.57	129.84	-0.70413	4.84831	0.0005033	0.005721	-1.62999
FBgn0033170	sPLA2	1066.7	759.16	1080.2	588.02	583.86	615.91	-0.70077	7.08847	0.00018362	0.002435	-1.6255
FBgn0031264	CG11835	74.681	70.092	60.39	37.756	46.445	41.785	-0.69979	3.3092	0.0026246	0.022156	-1.62846
FBgn0263617	CR43626	379.09	320.19	420.4	305.67	165.71	218.24	-0.69923	5.71869	0.0014334	0.013463	-1.62362
FBgn0033132	Tsp42Ej	369.59	420.53	414.3	224.92	240	279.25	-0.69629	5.82517	4.6601e-05	0.00072394	-1.61847
FBgn0016032	lbm	47.094	65.277	51.167	34.035	34.312	32.542	-0.69539	2.99748	0.0063136	0.044327	-1.62097
FBgn0021800	l(2)k16918	69.299	52.522	59.34	36.861	31.509	43.827	-0.69513	3.14016	0.0050901	0.037516	-1.61467
FBgn0042094	Adk3	290.6	257.86	433.61	242.2	165.06	200.73	-0.69179	5.53364	0.0019162	0.016896	-1.61527
FBgn0040773	CoVIIc	335.45	349.42	440.84	228.77	219.36	249.23	-0.69171	5.72967	9.3889e-05	0.0013573	-1.61425
FBgn0039102	SPE	142.22	180.1	197.39	102.06	123.78	95.381	-0.69096	4.6239	0.00053533	0.0060083	-1.61792
FBgn0085360	CG34331	68.459	76.89	89.98	54.907	51.532	38.625	-0.69088	3.5032	0.0029278	0.02416	-1.62224
FBgn0038147	CCHa2	1447.1	1340.3	1783	1041	741.14	1051.8	-0.68978	7.74482	0.00051435	0.0058196	-1.61274
FBgn0021895	ytr	512.56	484.74	499.22	304.4	329.41	293.65	-0.6891	6.13835	2.756e-05	0.00045409	-1.61357
FBgn0034885	CG4019	324.53	244.25	316.08	194.8	188.7	164.99	-0.68744	5.38498	0.00013694	0.0018797	-1.61327
FBgn0262508	CG43078	235.83	170.28	204.6	124.78	121.67	133.29	-0.68525	4.8569	0.00029348	0.0035993	-1.60823
FBgn0264294	Cyt-b5	849.1	775.72	1198.8	622.13	541.71	592.77	-0.68474	7.05323	0.00056076	0.0062508	-1.60743
FBgn0020626	Osbp	2232.7	1457.1	1883.3	1254.6	1179.9	1033.9	-0.68385	8.03256	0.00047323	0.0054106	-1.60682
FBgn0004652	fru	235.81	161.51	201.53	119.08	140.03	112.75	-0.6837	4.82809	0.00059836	0.0066246	-1.61042
FBgn0001186	Hex-A	285.14	278.38	299.72	200.52	163.56	174.1	-0.68137	5.35287	5.5067e-05	0.00084665	-1.604
FBgn0259143	CG42258	81.171	75.9	87.955	52.005	49.683	51.051	-0.6805	3.56543	0.0014418	0.013516	-1.60421
FBgn0027571	CG3523	14156	7355.9	12053	7866.8	7310.7	5790.4	-0.67871	10.6235	0.0036347	0.028851	-1.60078
FBgn0024293	Spn43Ab	1188.4	801.97	1212.2	691.12	709.26	600.05	-0.67833	7.23667	0.00058903	0.0065287	-1.60094
FBgn0010516	wal	1488.6	1234.2	1526.3	814.85	816.08	1026.2	-0.67765	7.64449	0.00019978	0.0026225	-1.59913
FBgn0003256	rl	229.79	251.1	349.76	210.06	148.88	160.28	-0.67747	5.29926	0.001261	0.012233	-1.5998
FBgn0001122	G-oalpha47A	112.35	170.42	151.39	96.474	83.876	91.635	-0.67595	4.37582	0.0013136	0.012646	-1.59626
FBgn0031298	Atg4	491.05	366.91	423.52	261.85	277.89	263.39	-0.67306	5.92184	0.00012634	0.0017465	-1.59561
FBgn0004654	Pgd	1665.7	1023.9	1623.4	884.87	1034.5	796.16	-0.66707	7.66971	0.0017103	0.015413	-1.58827
FBgn0037974	CG12224	473.43	795.36	755.94	349.63	413.21	513.32	-0.66645	6.58218	0.0030026	0.024648	-1.58658
FBgn0041342	Cct1	497.59	435.07	492.04	295.9	314.8	286.66	-0.66576	6.07668	6.1857e-05	0.0009386	-1.58766
FBgn0003435	sm	166.77	208.33	223.99	132.39	101.63	144.67	-0.66511	4.83882	0.0010208	0.010306	-1.58201
FBgn0264502	CG43901	93.966	95.404	87.994	51.924	56.528	67.021	-0.66421	3.74758	0.0015492	0.014245	-1.58066
FBgn0051100	CG31100	410.32	617.23	524.79	310.99	324.95	344.4	-0.66366	6.20147	0.00042944	0.004968	-1.58347
FBgn0030239	CG17333	246.8	211.13	362.01	168.25	134.99	216.29	-0.65968	5.28829	0.0048062	0.036079	-1.57823
FBgn0002772	Mlc1	1531.2	1122.2	1499.7	915.19	1001	713.98	-0.65838	7.61857	0.00084583	0.0088065	-1.57902
FBgn0031683	CG4230	53.441	56.456	59.322	35.923	33.339	38.196	-0.65711	3.05963	0.0053292	0.038981	-1.57475
FBgn0030309	CG1572	90.908	110.01	116.59	59.48	70.384	71.804	-0.65586	3.94035	0.001452	0.013573	-1.57441
FBgn0025806	Rap2l	95.132	87.546	130.86	69.992	60.721	68.397	-0.65522	3.92232	0.0032919	0.026604	-1.5747
FBgn0032400	CG6770	8800.6	8274.9	10922	7695.9	5598.1	4506.4	-0.65335	10.3718	0.0023757	0.020327	-1.57286
FBgn0250868	CG42239	108.02	122.63	155.42	84.157	59.524	102.71	-0.65249	4.21943	0.0060496	0.042998	-1.5669
FBgn0262742	Fas1	142.18	187.92	166.75	100.17	107.2	108.98	-0.65219	4.57634	0.00053014	0.0059638	-1.57057
FBgn0020545	kraken	432.2	230.55	376.43	205.09	234.22	221.57	-0.65208	5.62937	0.0029412	0.024251	-1.57242
FBgn0052062	A2bp1	369.58	390.33	437.8	227.74	232.15	305.72	-0.64773	5.83601	0.00035517	0.0042287	-1.56439
FBgn0028342	l(1)G0230	371.6	296.81	415.27	262	196.87	233.16	-0.64717	5.69187	0.00062899	0.0068935	-1.56594
FBgn0041004	CG17715	157.3	244.36	269.99	148.45	127.51	154.12	-0.64441	5.00917	0.0031381	0.025551	-1.56169
FBgn0033244	CG8726	274.43	263.78	265.98	175.86	149.76	189.99	-0.64359	5.2671	0.00017235	0.0023044	-1.55969
FBgn0030679	CG8206	706.82	506.08	697.64	428.31	457.32	336.9	-0.64272	6.50696	0.0011244	0.011149	-1.56278
FBgn0032904	Mtp	629.09	670.67	753.9	486.98	400.2	429.3	-0.64152	6.61192	0.00024544	0.0031096	-1.55996
FBgn0013308	Odc2	167.69	140.09	209.63	114.41	105.36	112.5	-0.63851	4.6386	0.0014106	0.013313	-1.5572
FBgn0030600	hiw	350.92	204.32	224.09	129.33	175.02	196.77	-0.63716	5.22369	0.006465	0.045195	-1.55518
FBgn0262735	Imp	549.99	500.28	625	418.97	321.27	337.76	-0.63566	6.32133	0.00054394	0.006091	-1.55405
FBgn0032382	Mal-B2	960.93	787.46	769.32	547.39	520.36	555.61	-0.63307	6.90819	0.00026953	0.0033549	-1.55093
FBgn0262559	Mdh2	1307.1	1177.8	1551.8	868.82	842.79	892.02	-0.63266	7.58794	0.00032507	0.0039181	-1.55041
FBgn0015039	Cyp9b2	864.04	850.71	1133.4	769.81	516.64	551.33	-0.63187	7.08605	0.0020667	0.018043	-1.54978
FBgn0037614	CG8116	58.815	65.218	70.563	39.674	42.008	44.015	-0.63113	3.26303	0.0068725	0.047568	-1.54814
FBgn0032988	Tif-IA	102.77	144.08	169.74	103.16	73.389	92.745	-0.63099	4.33449	0.0061221	0.043355	-1.54697
FBgn0034113	CG8060	87.7	110.02	107.4	57.585	77.481	61.614	-0.62996	3.89242	0.0027146	0.02263	-1.55135
FBgn0053653	Caps	126.12	129.43	164.64	111.73	73.371	87.102	-0.62652	4.34772	0.0036198	0.028755	-1.54366
FBgn0260795	CG42575	178.34	153.74	200.46	105.82	111.39	128.51	-0.62478	4.68573	0.0010225	0.010307	-1.54038
FBgn0032029	CG17292	300.25	345.55	404.02	243.98	205.56	231.97	-0.62402	5.65568	0.00045597	0.00525	-1.54043
FBgn0003360	sesB	2686.9	2400.4	3097.5	1744.2	1714.8	1860.6	-0.62165	8.61078	0.00032867	0.0039566	-1.53861
FBgn0036726	CG7603	224.36	224.82	291.48	147.41	158.59	176.1	-0.62056	5.15792	0.00085156	0.0088474	-1.53632
FBgn0261564	CG42678	523.16	409.74	498.18	332.84	326.81	270.65	-0.61955	6.10077	0.0005238	0.0059128	-1.5383
FBgn0038038	CG5167	1643.4	1057	1785	930.22	913.87	1076.2	-0.61913	7.74506	0.0032847	0.026568	-1.53594
FBgn0027654	jdp	122.93	141.15	154.44	96.473	96.139	79.163	-0.61909	4.34349	0.0015095	0.013977	-1.53995
FBgn0086910	l(3)neo38	514.85	628.87	562.65	344.05	352.28	416.13	-0.61825	6.35523	0.00049985	0.005695	-1.53387
FBgn0259238	CG42336	1019.1	1378.4	1692.9	932.21	990.64	748.71	-0.61423	7.61407	0.0035815	0.028499	-1.53109
FBgn0035499	Chd64	866.22	1147.7	951.4	624.87	692.13	623.07	-0.61189	7.15196	0.00058512	0.0064927	-1.52846
FBgn0030274	CG1908	295.71	309.61	210.82	150.18	190.5	193.52	-0.61177	5.29983	0.0020354	0.017818	-1.52778
FBgn0051140	CG31140	245.31	148.84	184.16	124.78	121.67	132.15	-0.61044	4.80779	0.0034493	0.027625	-1.5275
FBgn0039890	CG2316	337.7	404.91	539.01	303.55	239.74	296.83	-0.60997	5.94731	0.0027091	0.022623	-1.52552
FBgn0261642	mbl	503.22	667.79	713.99	470	408.97	356.52	-0.60888	6.50129	0.0016869	0.015244	-1.52571
FBgn0036008	CG3408	111.18	112.87	152.35	87.967	72.653	86.904	-0.60616	4.20016	0.0039014	0.030376	-1.52066
FBgn0022238	lolal	96.263	113.89	131.91	72.771	64.915	87.826	-0.60572	4.06629	0.0046526	0.035135	-1.51683
FBgn0259163	CG42268	162.23	140.15	143.23	91.655	106.5	94.055	-0.60562	4.43787	0.0011067	0.011007	-1.52496
FBgn0029935	CG4615	89.715	73.914	107.36	56.691	54.736	67.055	-0.6044	3.737	0.0071714	0.049288	-1.5183
FBgn0032881	CG9319	240.18	167.33	251.6	133.23	120.54	181.51	-0.60063	4.99944	0.0060551	0.043005	-1.51422
FBgn0033451	CG1665	377.09	409.79	473.59	249.49	251	332.4	-0.59964	5.92803	0.0012639	0.012235	-1.51337
FBgn0040337	CG3021	114.12	80.727	100.25	73.831	64.283	55.949	-0.59918	3.85616	0.0060303	0.042923	-1.52062
FBgn0053554	Nipped-A	424.17	508.11	612.69	394.38	257.51	370.99	-0.59577	6.22127	0.0041515	0.032144	-1.51041
FBgn0003149	Prm	1882.4	1222.5	1364.7	1086.4	1078.1	792.89	-0.59538	7.74914	0.0045706	0.034618	-1.51133
FBgn0086558	Ubi-p5E	1454.6	1826.2	1773.8	1092.9	1013.3	1244.4	-0.59359	7.92747	0.00091548	0.0094773	-1.50857
FBgn0029003	mab-21	286.09	247.22	248.61	149.25	169.72	200.3	-0.59227	5.24679	0.0010034	0.010198	-1.50581
FBgn0039920	CG11360	192.33	216.1	232.19	157.02	117.96	150.67	-0.59195	4.96239	0.0015266	0.014095	-1.50504
FBgn0016691	Oscp	510.47	465.24	571.81	310.95	321.38	395.16	-0.59191	6.22525	0.00091803	0.0094775	-1.50612
FBgn0024804	Dbp80	266.07	298.82	362.07	251.68	165.04	198.47	-0.59183	5.48992	0.0029953	0.024614	-1.50679
FBgn0262656	dm	332.23	362.1	405.06	287.57	212.34	229.85	-0.5911	5.73445	0.0010669	0.010688	-1.50651
FBgn0030925	CG6361	662.19	678.44	801.97	505.85	431.05	490.63	-0.58615	6.69484	0.00078483	0.0082771	-1.50091
FBgn0012036	Aldh	1733	1132.9	1679.7	1122.3	879.4	1027.8	-0.58538	7.77764	0.0039132	0.030444	-1.50045
FBgn0037138	P5CDh1	175.11	167.42	166.76	114.4	80.89	145.51	-0.58436	4.6394	0.0070855	0.048835	-1.4944
FBgn0003721	Tm1	3131.9	2193	2566.7	2004.4	1648.7	1610.4	-0.58412	8.57299	0.0020604	0.018021	-1.49931
FBgn0035978	UGP	382.49	459.46	509.39	303.48	259.47	339.55	-0.58389	6.03402	0.0015037	0.013936	-1.49733
FBgn0025726	unc-13	448.35	367.92	361.15	291.28	264.97	228.87	-0.58271	5.83532	0.0010052	0.010205	-1.49967
FBgn0264652	Hph	235.86	170.27	216.86	136.12	127.58	152.89	-0.58142	4.92608	0.002376	0.020327	-1.49545
FBgn0085220	CG34191	128.26	143.09	157.51	105.01	89.905	91.744	-0.5806	4.39445	0.002112	0.018357	-1.49606
FBgn0036985	zye	248.78	233.61	232.23	148.37	176.87	152.09	-0.57991	5.12139	0.00082897	0.0086771	-1.49712
FBgn0015609	CadN	258.35	220.93	238.36	143.61	157.72	180.67	-0.57561	5.13062	0.0012982	0.012543	-1.48888
FBgn0260388	CG42514	208.17	167.37	209.69	139.97	151.24	100.3	-0.57475	4.83711	0.0041707	0.032242	-1.4948
FBgn0040232	cmet	96.296	138.29	121.73	82.265	78.846	78.926	-0.57037	4.13642	0.0058847	0.04207	-1.48442
FBgn0003464	sol	508.19	449.71	412.3	254.15	348.44	320.08	-0.57003	6.05857	0.0017666	0.015789	-1.48504
FBgn0030245	CG1637	508.24	409.74	503.29	308.16	370.81	277.62	-0.56924	6.11077	0.0017693	0.015799	-1.48577
FBgn0001235	hth	528.78	697.02	623	455.77	382.21	409.56	-0.56774	6.49016	0.0016469	0.014966	-1.48196
FBgn0086254	CG6084	578.77	463.26	648.51	447.34	328.92	366.7	-0.56451	6.36262	0.0037556	0.029523	-1.47909
FBgn0035588	CG10672	423.81	304.59	406.1	234.38	207.92	326.39	-0.56318	5.79139	0.0069627	0.048124	-1.47589
FBgn0053978	CG33978	202.9	207.35	193.36	142.79	140.68	124.34	-0.56316	4.88699	0.0011809	0.011608	-1.48013
FBgn0035032	CG4692	706.88	566.45	729.35	393.16	438.93	525.05	-0.56191	6.60755	0.0026959	0.022559	-1.47566
FBgn0035612	CG10625	147.46	163.54	170.82	90.627	124.62	111.33	-0.56004	4.56787	0.0031908	0.025937	-1.47536
FBgn0014388	sty	269.11	246.24	285.39	182.46	175.7	185.56	-0.55851	5.29356	0.00077676	0.0082275	-1.47271
FBgn0035515	CG14997	788.09	713.47	823.48	527.53	462.71	591.29	-0.55665	6.82437	0.0015367	0.014175	-1.47012
FBgn0030738	CG9915	118.67	158.73	129.94	96.459	84.716	96.209	-0.55656	4.33215	0.0050514	0.037312	-1.46851
FBgn0030680	CG8944	186.81	167.41	166.76	112.46	114.83	127.44	-0.55566	4.68165	0.0016816	0.015211	-1.46867
FBgn0263934	esn	183.54	153.78	146.32	103	107.12	119.3	-0.55486	4.57598	0.0030766	0.025134	-1.46816
FBgn0005624	Psc	215.71	231.71	192.36	147.49	147.5	140.46	-0.55412	4.97431	0.0014057	0.013292	-1.46924
FBgn0031505	CG12400	390.82	336.75	415.3	247.65	221.73	310.37	-0.5535	5.80596	0.0027357	0.022787	-1.46569
FBgn0041707	7B2	1954.3	1900.1	2020.4	1442.8	1342.8	1217.2	-0.55327	8.16	0.00097487	0.0099283	-1.46767
FBgn0013764	Chi	1105	779.62	927.85	690.22	626.73	601.1	-0.55175	7.09969	0.0027926	0.023142	-1.46632
FBgn0001092	Gapdh2	2903.7	2706	3538.4	2133.8	2007.2	2133.3	-0.54404	8.80222	0.0018671	0.016492	-1.45803
FBgn0032001	CG8360	148.45	137.22	161.6	88.764	110.76	107.78	-0.5409	4.4699	0.0042593	0.032798	-1.45546
FBgn0011259	Sema-1a	125.95	107.04	120.71	77.486	77.066	89.132	-0.53918	4.13858	0.0054657	0.039713	-1.45147
FBgn0039908	Asator	120.71	124.59	129.91	81.256	81.334	97.193	-0.5339	4.22516	0.0052079	0.03818	-1.44432
FBgn0027560	Tps1	4104.8	2880.2	3717.5	2765.4	2261.7	2371.3	-0.53259	9.0331	0.0047328	0.035658	-1.4466
FBgn0036837	CG18135	3273.1	2538.6	3775.8	2372.1	2219.9	2047.7	-0.52988	8.87555	0.0050387	0.037302	-1.44397
FBgn0029687	Vap-33-1	764.73	833.23	931.9	640.13	555.49	556.98	-0.5294	6.95652	0.0022713	0.019516	-1.44349
FBgn0010612	l(2)06225	369.51	322.14	426.53	259.03	243.36	275.94	-0.52321	5.78632	0.0026969	0.022559	-1.43664
FBgn0261403	sxc	426.33	558.76	613.73	390.49	337.6	386.2	-0.52141	6.30034	0.0057995	0.041643	-1.43483
FBgn0014863	Mlp84B	1079.5	878.93	1031.2	694.86	768.54	619.79	-0.52037	7.20024	0.0031234	0.025453	-1.43512
FBgn0031830	CoVb	357.82	359.16	419.38	272.3	241.59	279.43	-0.51935	5.81121	0.0020969	0.018259	-1.43241
FBgn0036099	CG11811	172.03	202.5	192.32	119.99	134.65	141.37	-0.51884	4.81694	0.0037178	0.02932	-1.4314
FBgn0031066	CoVIb	649.27	605.43	660.84	443.38	461.38	433.95	-0.51638	6.56163	0.0018452	0.016355	-1.43088
FBgn0033624	CG12384	913.27	1149.6	1257.2	772.38	735.54	821.17	-0.51174	7.35521	0.0046176	0.034924	-1.42548
FBgn0031097	obst-A	206.12	220.99	195.41	128.47	137.92	172.42	-0.5078	4.95582	0.0063637	0.044614	-1.41865
FBgn0010348	Arf79F	1419.4	1744.4	1893.5	1298.1	1154	1139.3	-0.49374	7.96862	0.0058829	0.04207	-1.40817
FBgn0003943	Ubi-p63E	853.38	989.98	995.35	695.84	639.52	682.09	-0.49288	7.13746	0.0035083	0.028029	-1.40708
FBgn0053095	CG33095	246.79	288.16	274.16	213.76	176.44	185.71	-0.49068	5.33616	0.0042891	0.032949	-1.40492
FBgn0033879	CG6543	968.45	733.87	928.85	570.93	644.01	661.08	-0.48795	7.03012	0.0067535	0.046977	-1.40253
FBgn0020439	fau	679.32	862.51	736.56	475.41	558.26	594.85	-0.48493	6.82453	0.0071145	0.048966	-1.39906
FBgn0035484	CG11594	1179	1316.1	1058.8	870.74	768.88	905.82	-0.48185	7.4656	0.0058345	0.041802	-1.39618
FBgn0010424	TpnC73F	1027.3	1077.6	874.7	696.73	724.56	726.17	-0.47248	7.21559	0.0054849	0.039817	-1.3875
FBgn0003071	Pfk	538.13	470.13	491.04	371.56	354.91	365.42	-0.45724	6.23425	0.0055885	0.040276	-1.37312
FBgn0261565	Lmpt	341.67	325.12	305.9	465.19	446.75	410.87	0.44412	6.06071	0.0072378	0.04964	1.35995
FBgn0033431	CG1827	347	310.49	320.2	467.07	414.82	457.01	0.45328	6.07377	0.0061637	0.043555	1.36945
FBgn0032005	Snx6	748.62	797.24	738.61	1053.2	1061.5	1024.4	0.45847	7.2967	0.0051008	0.037563	1.3741
FBgn0029629	CG8636	1089.2	930.54	1002.5	1344.3	1493.9	1319.1	0.46029	7.70056	0.0066994	0.046633	1.37557
FBgn0010441	pll	175.1	158.64	170.83	218.33	228.03	249.23	0.46212	5.13197	0.0067973	0.047147	1.37858
FBgn0010409	RpL18A	5964.1	5093.8	5403.4	7269.1	8100.5	7337.5	0.4641	10.1463	0.0054599	0.039713	1.37942
FBgn0086377	Syx7	480.61	539.3	484.91	770.61	673.87	638.28	0.46895	6.70214	0.0063238	0.044366	1.38406
FBgn0033889	CG6701	510.46	523.71	494.12	715.68	740.95	661.43	0.47111	6.72551	0.0045735	0.034618	1.3859
FBgn0037734	trbd	176.18	188.88	147.36	242.99	229.71	238.97	0.473	5.16023	0.0067826	0.047112	1.38884
FBgn0039776	PH4alphaEFB	193.38	203.43	231.16	316.79	289.8	265.9	0.47506	5.45139	0.0051636	0.037951	1.38938
FBgn0036372	CG10083	232.9	288.19	243.49	358.31	352.39	352.69	0.47514	5.73406	0.0043747	0.033423	1.39082
FBgn0025286	RpL31	4650.6	4084.4	4354.9	5861.4	6872.8	5465.4	0.47554	9.82237	0.0057814	0.041544	1.39035
FBgn0011284	RpS4	7228.5	6091.6	6474.5	8909.4	9974.9	8648.5	0.47609	10.4192	0.0048145	0.036079	1.39092
FBgn0000119	arr	364.16	378.67	352.95	521.88	575.68	427.36	0.47779	6.25099	0.0068487	0.047437	1.39163
FBgn0260748	CG5004	178.44	202.48	205.6	273.21	288.22	258.85	0.48425	5.35921	0.0036468	0.0289	1.39855
FBgn0033699	RpS11	8030.4	6294	6465.3	9111.7	10884	9096.2	0.48479	10.495	0.0066873	0.046583	1.39934
FBgn0035321	CG1275	199.81	230.71	234.24	314.83	332.86	282.15	0.48481	5.53854	0.0042969	0.032983	1.39876
FBgn0086472	RpS25	5774	4751.2	5078.1	7980.2	7706	6156.9	0.48541	10.0814	0.0066767	0.046542	1.3999
FBgn0037094	CG7611	1034.9	1206.1	1027.1	1364.1	1625	1586.9	0.48548	7.82804	0.0050906	0.037516	1.4002
FBgn0027588	CG14476	971.81	992.88	993.32	1527.9	1422.6	1194.1	0.48685	7.68505	0.0049092	0.036621	1.40114
FBgn0035753	RpL18	5784.6	4623.6	5046.4	6848.4	8382.9	6438.7	0.48773	10.069	0.0069604	0.048124	1.40217
FBgn0086915	Mst77F	273.34	249.17	263.93	395.24	353.16	355.09	0.48894	5.78187	0.0027831	0.023083	1.40315
FBgn0015834	Trip1	1088.1	890.62	987.18	1352.8	1427.7	1386.3	0.49062	7.69113	0.0038249	0.029852	1.4049
FBgn0031437	p16-ARC	131.41	155.79	129.94	187.15	205.9	193.77	0.4917	4.87744	0.005364	0.039172	1.40677
FBgn0031590	CG3702	239.2	246.29	222.01	332.78	331.82	331.79	0.49367	5.63337	0.0021741	0.018797	1.40833
FBgn0024187	syd	445.26	458.51	367.31	527.42	634.67	628.61	0.49418	6.47431	0.0057173	0.041113	1.4088
FBgn0030749	Anxb11	337.59	427.38	374.42	548.35	545.37	511.73	0.49448	6.31737	0.0044631	0.033993	1.40904
FBgn0030996	CG14194	202.82	186.89	173.94	244.79	309.08	240.39	0.49661	5.3087	0.0055084	0.039904	1.40914
FBgn0034246	Dcr-2	35412	35232	33197	54931	51237	40436	0.49755	12.8226	0.005165	0.037951	1.41181
FBgn0030060	CG2004	167.59	151.84	148.35	219.32	225.55	215.84	0.4988	5.04422	0.0035741	0.028485	1.41244
FBgn0020249	stck	192.15	186.91	158.61	256.21	226.1	279.32	0.50039	5.24532	0.0045093	0.034238	1.41654
FBgn0263395	hppy	187.82	159.62	153.48	233.5	250.51	224.04	0.50065	5.14262	0.0042501	0.032753	1.4135
FBgn0037328	RpL35A	3129.9	2680.7	2863.3	3747.5	4611.7	3915.4	0.50098	9.24382	0.0038056	0.029748	1.41512
FBgn0028671	Vha100-1	1571.9	1591.5	1515.1	2403.3	2201.1	2017.6	0.50129	8.35408	0.0027133	0.02263	1.41541
FBgn0033266	Socs44A	154.89	161.58	167.76	196.52	259.26	229.69	0.50158	5.09543	0.005423	0.03949	1.41559
FBgn0003656	sws	314.95	287.14	281.34	443.45	460.71	346.17	0.50259	5.95602	0.0047989	0.036079	1.41531
FBgn0028399	TMS1	395.21	405.89	471.55	651.46	651.87	500.47	0.50391	6.4813	0.0058989	0.04211	1.41736
FBgn0019948	Phm	347.22	416.64	427.58	607.96	573.66	510.71	0.50644	6.38832	0.0041872	0.032344	1.42041
FBgn0024983	CG4293	111.03	102.19	106.39	167.42	153.5	132.55	0.50714	4.50585	0.0064192	0.044939	1.41882
FBgn0038738	CG4572	532.78	463.31	476.73	807.52	703.11	588.61	0.51193	6.69597	0.0048534	0.036287	1.42532
FBgn0261592	RpS6	8890.1	7407.6	7419.7	11260	12657	9938.6	0.51349	10.7018	0.0037963	0.029724	1.42746
FBgn0083962	CG34126	609.62	519.78	502.32	769.54	849.11	710.22	0.51379	6.84442	0.0032769	0.026527	1.42725
FBgn0004574	Rop	368.38	360.17	329.43	466.01	541.23	503.48	0.51403	6.22212	0.0021286	0.018473	1.42793
FBgn0039562	Gp93	1897.5	1643.1	1456.8	2758.8	2385.4	1995.8	0.51492	8.45706	0.0060663	0.043054	1.42874
FBgn0031495	GABPI	154.76	133.33	138.11	239.34	199.74	169.79	0.51662	4.92117	0.0071325	0.049056	1.4286
FBgn0040087	p115	293.6	254.02	279.27	423.61	359.04	401.35	0.51759	5.87078	0.0021816	0.018845	1.43187
FBgn0035767	CG8596	186.89	203.48	171.89	262.8	253.66	289.82	0.51808	5.3196	0.0022049	0.018987	1.434
FBgn0039713	RpS8	10829	8571.8	8952.2	13710	13863	13094	0.52037	10.9634	0.0024508	0.020858	1.43431
FBgn0051195	CG31195	284.21	332.92	354.94	527.66	464.72	402.93	0.52182	6.10503	0.0037815	0.029655	1.4354
FBgn0263706	CG43658	625.64	555.81	490.06	730.7	818.05	852.47	0.52245	6.88452	0.0029802	0.02451	1.43656
FBgn0003116	pn	118.64	142.15	135.03	223.27	182.54	162.77	0.52311	4.82033	0.0062482	0.043931	1.43646
FBgn0023000	mth	169.92	185.91	216.82	302.62	225.08	296.77	0.52386	5.3491	0.0050071	0.03725	1.43975
FBgn0051217	modSP	265.77	223.86	217.93	306.21	348.18	364.07	0.52516	5.65183	0.0022058	0.018987	1.4394
FBgn0000261	Cat	3048.9	3589	3040.3	4762.9	4827.5	4347	0.52614	9.41662	0.0018606	0.016464	1.44008
FBgn0261461	RhoGAP18B	475.08	415.63	387.75	568.11	734.49	538.63	0.52705	6.50136	0.0048841	0.036489	1.44019
FBgn0030362	regucalcin	7339.8	6878	9923.9	11538	11773	11496	0.52784	10.7359	0.004451	0.033927	1.44178
FBgn0037351	RpL13A	12259	8742.1	9291.8	13248	16889	13539	0.52787	11.0633	0.0061851	0.043644	1.44179
FBgn0030289	CG1597	261.49	200.46	233.24	331.82	335.26	335.26	0.52844	5.62806	0.0017549	0.015733	1.44182
FBgn0034025	GalNAc-T1	197.4	158.63	158.59	264.77	225.29	252.85	0.5294	5.19876	0.003016	0.024722	1.44361
FBgn0013987	MAPk-Ak2	257.55	352.44	315.07	443.38	455.35	437.41	0.52983	6.03911	0.0024839	0.021084	1.44438
FBgn0025615	Torsin	200.66	170.32	175.97	302.66	271.01	215.1	0.53035	5.28525	0.0043744	0.033423	1.44212
FBgn0028697	RpL15	6876.1	6037.1	6439.7	9658.2	10393	7905.1	0.53067	10.4186	0.0025426	0.021545	1.44455
FBgn0031055	et	180.27	135.26	136.09	230.73	221.25	199.75	0.5309	5.0122	0.0046446	0.035102	1.44309
FBgn0052473	CG32473	304.43	330.97	339.62	461.33	500.91	446.77	0.53143	6.11505	0.0013494	0.012885	1.44511
FBgn0035432	ZnT63C	280.77	251.12	248.6	424.61	358.29	344.78	0.53152	5.7957	0.0018631	0.016471	1.44484
FBgn0035091	CG3829	625.95	837.21	702.8	945.3	1159.6	1029	0.53279	7.26349	0.0033617	0.027015	1.44689
FBgn0015568	alpha-Est1	691.92	555.75	705.83	927.42	889.88	1010.2	0.53331	7.11519	0.0023944	0.020466	1.4474
FBgn0015765	Mpk2	82.277	99.339	77.779	123.83	139.13	112.77	0.53568	4.22726	0.0072361	0.04964	1.44849
FBgn0036913	CG8334	237.91	190.77	160.68	249.47	299.36	306.07	0.53645	5.39671	0.0048225	0.036112	1.45056
FBgn0035976	PGRP-LC	139.73	105.08	114.59	165.4	174.92	180.88	0.53651	4.69069	0.0038792	0.030227	1.45019
FBgn0015295	shark	146.12	111.9	113.58	180.57	176.58	182.11	0.53768	4.73882	0.0035607	0.028401	1.45118
FBgn0031538	CG3246	823.21	656.02	740.64	967.99	994.43	1262.8	0.53854	7.30236	0.0033371	0.026903	1.45289
FBgn0038465	Irc	1369.2	1481.5	1796.3	2642.6	2104	2003.8	0.53869	8.36638	0.0040599	0.031485	1.45264
FBgn0032713	CG17323	539.5	796.36	615.86	834.67	1008.5	998.67	0.54167	7.11897	0.0048039	0.036079	1.45607
FBgn0019949	Cdk9	101.31	85.649	76.764	139.99	125.13	118.51	0.54217	4.25408	0.0060419	0.042974	1.45467
FBgn0037644	CG11964	102.56	103.17	112.51	139.84	158.67	165.73	0.54309	4.52265	0.0026686	0.02244	1.45877
FBgn0039359	RpL27	2814.9	2490.9	2396.9	4270.5	3879.2	3107.2	0.5475	9.09999	0.0026862	0.022508	1.46142
FBgn0264449	CG43867	210.26	182.01	173.94	260.88	295.99	270.36	0.54783	5.34557	0.0012526	0.012174	1.461
FBgn0264357	SNF4Agamma	636.42	647.34	551.43	875.41	1021.6	789.2	0.55005	7.03494	0.0020636	0.018032	1.46372
FBgn0032018	CG7806	314.92	279.36	262.94	446.29	406.34	403.82	0.55192	5.94233	0.0010214	0.010306	1.46573
FBgn0260744	Tango9	1162	1185.6	1457.7	1906.9	1799.7	1877	0.55311	8.08702	0.0014141	0.013329	1.46732
FBgn0064225	RpL5	14263	11180	11738	19398	17919	17243	0.55333	11.3739	0.0015032	0.013936	1.46742
FBgn0045842	yuri	179.58	234.63	227.08	319.56	304.31	318.99	0.5547	5.52903	0.0013141	0.012646	1.47026
FBgn0029878	Pat1	433.69	529.58	482.85	680.64	732.34	712.28	0.5551	6.69563	0.0010985	0.010937	1.46963
FBgn0085370	Pde11	289.25	256.98	220	356.36	417.85	351.69	0.55617	5.78365	0.0016126	0.014734	1.4694
FBgn0028539	CG31731	494.57	601.61	566.73	831.02	870.48	743.87	0.55645	6.89707	0.001322	0.012709	1.47054
FBgn0035879	CG7112	246.61	223.87	218.94	326.12	351.64	337.6	0.55885	5.63418	0.00060989	0.006737	1.47277
FBgn0263398	CG6364	100.52	132.43	117.64	175.86	174.07	167.14	0.55932	4.66976	0.0022364	0.019233	1.47486
FBgn0085437	CG34408	543.29	411.72	381.63	690.19	686.06	593.08	0.55967	6.5847	0.0029736	0.024477	1.47334
FBgn0033421	CG1888	100.28	86.62	81.867	122.84	144.24	128.84	0.56035	4.29149	0.0036933	0.029197	1.4731
FBgn0038167	lkb1	104.49	72.943	87.98	125.7	137.29	128.81	0.56374	4.27544	0.0049034	0.036606	1.47619
FBgn0000114	aret	185.86	172.25	220.91	302.58	279.47	273.9	0.56425	5.38756	0.0010398	0.010445	1.47827
FBgn0083959	trpm	315.82	229.68	220	377.21	425.6	329.82	0.56662	5.78827	0.0032623	0.026431	1.4796
FBgn0031836	CG11050	190.23	196.58	267.94	324.27	337.93	307.56	0.56695	5.56516	0.0019194	0.016908	1.48111
FBgn0263316	Mrp4	139.86	129.45	132.99	230.82	211.06	153.7	0.56871	4.86922	0.0042399	0.0327	1.48044
FBgn0027525	CG7686	559.4	448.7	455.26	785.71	733.14	652.25	0.56969	6.72087	0.0013798	0.013086	1.48364
FBgn0036684	CG3764	244.51	256.04	205.67	337.47	374.87	337.69	0.57245	5.67683	0.00080988	0.0085046	1.48683
FBgn0027279	l(1)G0196	598.98	538.28	508.46	925.68	829.18	691.84	0.57263	6.89155	0.0015189	0.01405	1.4867
FBgn0036030	CG6767	2557.9	3589	3332.9	4725.1	4565.8	4809.6	0.57273	9.41444	0.0015246	0.01409	1.48743
FBgn0259212	cno	462.45	553.94	421.52	659.81	778.79	703.06	0.5746	6.69895	0.0013296	0.01277	1.48943
FBgn0043364	cbt	279.81	281.31	290.52	482.29	469.29	316.22	0.57535	5.94647	0.0029603	0.024388	1.48866
FBgn0030336	CG1578	294.51	231.64	210.79	322.27	397.2	379.25	0.57648	5.74016	0.0017433	0.015668	1.49092
FBgn0039637	CG11880	438.84	429.29	374.45	695.94	583.77	574.45	0.57753	6.49069	0.0010092	0.010228	1.49219
FBgn0027932	Akap200	842.9	1532.3	1090.5	1772.6	1786.2	1613.9	0.5776	7.96701	0.0070996	0.048898	1.49254
FBgn0025683	CG3164	1209.9	1258.6	1114.1	1873.8	1855.6	1617.4	0.5778	8.01477	0.00065212	0.0071072	1.49244
FBgn0024329	Mekk1	415.31	355.26	372.38	556.82	574.5	575.37	0.57854	6.3712	0.00062668	0.006876	1.49323
FBgn0051150	CG31150	448.63	560.75	465.48	724.16	750.31	728.56	0.57856	6.73789	0.00078872	0.0083002	1.49372
FBgn0032770	CG13086	92.77	74.928	72.661	120.06	125.27	113.81	0.58142	4.14551	0.0033565	0.027015	1.49418
FBgn0086690	cp309	655.71	781.73	562.71	958.59	1041.9	994.2	0.58211	7.17819	0.0012143	0.011872	1.49723
FBgn0030653	CG7860	856.41	812.79	805.1	1233.7	1379.1	1092	0.58274	7.4845	0.00072096	0.0077199	1.49731
FBgn0030800	CG9104	75.741	66.177	64.468	87.807	112.5	108.93	0.58302	3.9325	0.0049939	0.037225	1.49834
FBgn0032409	Ced-12	69.508	89.605	73.672	110.57	113.11	126.27	0.58391	4.10498	0.0032387	0.026305	1.50332
FBgn0086676	spin	248.66	198.54	203.6	305.3	377.66	294.93	0.58917	5.56894	0.0011652	0.011484	1.5026
FBgn0037533	CD98hc	660.01	708.66	680.29	1120.4	997.98	966.52	0.59033	7.2177	0.00041855	0.0048686	1.50559
FBgn0038460	CG18622	63.014	63.27	63.426	86.906	93.408	106.49	0.59227	3.82112	0.0034845	0.027864	1.5118
FBgn0051323	CG31323	73.764	70.039	98.142	140.99	106.92	117.26	0.59317	4.16314	0.0055373	0.040025	1.50931
FBgn0261794	kcc	137.78	147.98	135.05	210.81	210.91	214.59	0.59557	4.95103	0.00046007	0.0052787	1.51211
FBgn0036825	RpL26	6111.3	4611	4752.8	7569.8	8917	6921.3	0.59712	10.1357	0.0013466	0.012883	1.51263
FBgn0003941	RpL40	3229.2	2912.4	2880.7	4559.7	5496	3601.5	0.59819	9.35831	0.0017739	0.015826	1.51372
FBgn0031568	CG10019	64.101	74.018	59.362	105.93	95.07	98.646	0.59935	3.8811	0.0028461	0.023526	1.51734
FBgn0029896	CG3168	641.87	787.57	589.29	870.56	1096.9	1092.6	0.59975	7.20214	0.0012504	0.012165	1.51583
FBgn0032587	CG5953	225.17	202.48	162.72	264.6	325.18	305.05	0.60014	5.43681	0.0010116	0.01023	1.51571
FBgn0020416	Idgf1	218.17	389.49	306.9	412.09	426.81	549.34	0.6008	6.06511	0.0056982	0.041006	1.51793
FBgn0052138	CG32138	229.54	213.17	209.73	319.51	351.71	317.97	0.60114	5.58018	0.00023803	0.0030373	1.51614
FBgn0037848	Tsp86D	108.88	101.22	100.26	157.88	174.3	138.35	0.60317	4.52031	0.0011982	0.011738	1.51608
FBgn0020621	Pkn	611.86	618.14	528.93	882.04	869.38	921	0.60318	7.00593	0.00034558	0.0041247	1.51934
FBgn0036058	CG6707	736.86	776.8	708.95	1066.4	1266.8	1044.3	0.60387	7.34283	0.00042039	0.0048806	1.51961
FBgn0011232	scat	172.89	148.91	147.33	264.81	221.91	226.35	0.60449	5.11068	0.00071528	0.0076843	1.51998
FBgn0262870	axo	320.21	254.99	268.04	451.95	424.41	406.17	0.60566	5.95058	0.00042489	0.0049212	1.52095
FBgn0039160	CG5510	117.57	144.11	128.9	208.98	216.28	168.59	0.60577	4.8498	0.0012349	0.01205	1.52043
FBgn0035812	CG7457	58.818	71.086	65.472	93.547	105.58	98.633	0.60658	3.86991	0.0025236	0.021402	1.52404
FBgn0029828	CG6067	222.2	264.81	229.17	410.42	358.37	321.66	0.60673	5.71741	0.00050242	0.0057176	1.52259
FBgn0003514	sqh	559.8	842.12	641.44	979.37	1152.7	980.43	0.60698	7.22387	0.0016765	0.015192	1.52323
FBgn0037718	P58IPK	212.6	235.57	242.43	397.19	326.51	328.48	0.60723	5.66579	0.00038304	0.0045053	1.52357
FBgn0051635	CG31635	331.95	285.2	252.73	446.23	504.53	373.97	0.60808	5.99642	0.0010827	0.010802	1.52289
FBgn0003301	rut	169.66	127.46	152.42	202.21	250.59	233.13	0.61046	5.05311	0.0011314	0.011185	1.52585
FBgn0039239	CG13641	3342.5	3115.9	3248	4298.6	6339.1	4184.8	0.61087	9.47133	0.0018184	0.01615	1.52709
FBgn0032330	Samuel	374.73	371.88	285.48	482.07	592.82	502.45	0.61222	6.24479	0.00078285	0.008274	1.5283
FBgn0040918	schlank	880.11	1011.4	1150.8	1777.5	1650.8	1225.6	0.61346	7.80069	0.0017554	0.015733	1.52973
FBgn0031417	CG3597	112.06	99.268	101.29	158.82	167.3	152.09	0.61477	4.53808	0.00057964	0.0064466	1.52969
FBgn0051536	Cdep	522.22	562.66	494.13	789.38	825.77	805.1	0.61597	6.85838	0.00020851	0.0027173	1.53276
FBgn0037730	CG9444	2056.7	1831.9	1954.9	3655.1	2959.9	2345.1	0.61681	8.7433	0.0014156	0.013329	1.53334
FBgn0039026	CG7029	732.36	556.74	572.91	895.23	1077.3	883.03	0.61736	7.09606	0.00084421	0.008799	1.53359
FBgn0024332	Mcm3	124.75	104.15	82.926	164.52	162.08	152.1	0.61935	4.53754	0.0016176	0.01474	1.53515
FBgn0000719	fog	213.67	280.43	202.6	358.3	401.59	311.26	0.62087	5.68638	0.00094202	0.0096946	1.53746
FBgn0015924	crq	274.55	322.23	298.71	444.3	444.92	489.37	0.62128	6.04723	0.00019697	0.0025911	1.53948
FBgn0034013	unc-5	164.25	125.54	120.75	214.62	193.58	224.89	0.62423	4.93264	0.0009621	0.0098495	1.54209
FBgn0032000	CG8372	185.65	146.95	149.38	222.07	255.58	265.47	0.62443	5.16152	0.00054977	0.0061422	1.54181
FBgn0040777	CG14767	618.43	716.45	713	1044.7	1243.8	869.4	0.62516	7.23778	0.0007695	0.0081594	1.54203
FBgn0030521	CtsB1	1053.7	737.78	762.17	1496.7	1287.8	1155.8	0.626	7.55608	0.0014384	0.013497	1.54301
FBgn0034094	Tsf3	196.34	154.73	161.65	295.07	244.19	251.87	0.62634	5.25059	0.00049951	0.005695	1.54301
FBgn0035763	CG8602	342.85	335.8	396.88	602.3	563.37	496.81	0.62876	6.31389	0.00035003	0.0041727	1.54573
FBgn0050148	CG30148	236.05	216.05	279.22	394.27	447.2	288.33	0.62905	5.76019	0.0016141	0.014734	1.54488
FBgn0051453	pch2	75.939	97.381	87.976	121.87	125.01	159.66	0.63253	4.29768	0.0019542	0.017168	1.55586
FBgn0030057	Ppt1	53.49	62.306	65.45	115.51	76.814	89.439	0.63418	3.78105	0.0050325	0.037302	1.55459
FBgn0032934	CG8679	177.16	172.32	131.01	266.66	298.88	179.36	0.63434	5.16242	0.0037082	0.029268	1.55029
FBgn0032871	CG2611	83.251	66.136	86.924	111.48	135.7	119.55	0.63582	4.15389	0.0017611	0.015769	1.5519
FBgn0037315	Cerk	336.24	316.39	237.41	427.25	463.02	494	0.63669	6.04739	0.00050534	0.0057376	1.55529
FBgn0027598	cindr	361.98	362.12	325.34	495.3	579.79	557.93	0.63775	6.28438	0.0001999	0.0026225	1.55609
FBgn0262103	Sik3	451.58	403.97	349.91	573.77	663.81	640.3	0.63955	6.48447	0.00030604	0.0037301	1.55781
FBgn0019947	Psn	457.01	411.72	441.93	696.78	729.87	615.12	0.64013	6.60478	0.00017728	0.0023573	1.55782
FBgn0031220	CG4822	818.26	1248	1029.1	1601.5	1756.3	1470.1	0.64117	7.84255	0.00091607	0.0094773	1.55972
FBgn0038747	RhoGAP92B	500.71	472.13	377.55	614.38	787.45	706.48	0.64278	6.64959	0.00052685	0.0059335	1.56126
FBgn0036169	Fuca	186.91	162.49	226.01	363.23	288	247.56	0.64442	5.42638	0.0012138	0.011872	1.562
FBgn0034756	Cyp6d2	282.13	366.03	374.38	546.46	497.14	556.72	0.64522	6.25206	0.00027877	0.0034449	1.56504
FBgn0036932	CG14184	66.371	98.388	78.781	134.29	149.57	96.831	0.64582	4.20341	0.0050481	0.037312	1.56316
FBgn0002565	Lsp2	537870	500040	538680	861200	898980	711090	0.64843	16.8371	0.00017221	0.0023044	1.56748
FBgn0022023	eIF-3p40	1567.5	1394.9	1276.7	2228.3	2422.5	2006	0.65124	8.30158	0.00020062	0.0026262	1.57033
FBgn0038488	m-cup	122.8	132.42	107.45	151.09	214.65	205.14	0.65342	4.77389	0.00098013	0.0099715	1.5741
FBgn0038803	CG5191	130.25	122.64	121.75	200.44	209.35	180.04	0.65651	4.82055	0.00019397	0.002555	1.57439
FBgn0034093	CG15706	224.35	279.43	228.15	398.04	378.08	379.4	0.6579	5.78005	9.8824e-05	0.0014161	1.57873
FBgn0259224	CG42324	616.92	414.6	432.77	789.43	782.88	737.93	0.65821	6.77526	0.00061245	0.0067577	1.57772
FBgn0032900	CG14401	546.44	399.06	355.05	654.17	759.12	639.4	0.65884	6.60514	0.00084699	0.0088093	1.57832
FBgn0035833	CG7565	70.437	60.32	68.533	125.89	101.97	86.24	0.65922	3.92712	0.0026801	0.022477	1.5761
FBgn0030341	p24-1	157.87	101.14	144.22	235.5	201.37	199.7	0.65989	4.92763	0.0011268	0.01115	1.57868
FBgn0052066	CG32066	56.8	94.511	72.642	108.65	112.21	134.26	0.66009	4.09602	0.0030287	0.024784	1.58569
FBgn0033391	CG8026	902.4	821.5	1039.3	1645.1	1478.3	1244	0.66067	7.69076	0.00032298	0.0038976	1.58056
FBgn0029094	asf1	82.334	92.471	103.29	150.33	127.47	163.31	0.66155	4.40284	0.0006828	0.0073759	1.58618
FBgn0030505	NFAT	673.73	579.15	599.48	916.97	1095.3	927.06	0.66646	7.11848	0.00012091	0.0016809	1.5868
FBgn0039590	CG10011	176.39	254.14	207.68	263.56	393.11	358.31	0.6684	5.59017	0.00096022	0.0098404	1.59035
FBgn0030799	CG4872	50.193	55.515	44.019	78.455	78.859	81.174	0.66882	3.53411	0.0018443	0.016355	1.59282
FBgn0032262	CG7384	112.24	128.49	138.07	224.16	194.56	183.52	0.66884	4.84478	0.00025208	0.003171	1.58986
FBgn0033926	Arc1	21992	17591	17007	32186	28369	29425	0.66905	12.0498	0.00015669	0.0021191	1.59003
FBgn0035622	CG10590	240.28	238.48	242.45	441.65	385	319.47	0.66934	5.76486	0.0001583	0.002134	1.58916
FBgn0000394	cv	82.202	72.976	82.851	129.54	151.33	96.817	0.67027	4.18405	0.0020907	0.018221	1.58673
FBgn0085354	CG34325	60.85	53.508	62.388	109.79	74.189	98.515	0.67353	3.76921	0.0026283	0.022156	1.5983
FBgn0032420	CG6583	78.193	108.06	128.82	189.19	143.73	170.5	0.67373	4.58669	0.0016232	0.014777	1.59779
FBgn0005655	mus209	88.639	87.601	89	132.3	157.15	133.55	0.67479	4.34108	0.00036157	0.0042945	1.59478
FBgn0259171	Pde9	376.97	372.81	375.44	539.72	740.6	515.47	0.67515	6.40689	0.00035932	0.004273	1.59595
FBgn0024234	gbb	200.73	173.22	204.58	314.83	321.64	286.73	0.67552	5.45278	5.5824e-05	0.00085338	1.59577
FBgn0013720	pck	95.161	124.65	104.36	172.05	195.79	149.98	0.67658	4.62748	0.00051289	0.0058098	1.59737
FBgn0032421	crok	112.19	86.533	156.41	215.67	193.82	158.19	0.67797	4.75786	0.0027726	0.023055	1.5985
FBgn0016672	Ipp	88.455	65.181	65.502	112.47	111.36	127.41	0.67938	4.07479	0.00095208	0.0097775	1.60283
FBgn0085405	CG34376	367.4	414.72	351.94	595.58	686.3	535.13	0.6805	6.42156	0.00014014	0.0019183	1.60222
FBgn0261625	CG42708	1079.4	664.71	962.6	1801.2	1489.5	1048.3	0.681	7.67357	0.0035845	0.028499	1.60305
FBgn0034500	CG11200	33.108	37.017	28.671	51.981	51.388	55.608	0.68134	2.96527	0.0050206	0.037281	1.60914
FBgn0028936	nimB5	401.65	402.94	534.94	855.78	698.75	593.29	0.68141	6.66153	0.00062089	0.0068242	1.60341
FBgn0044823	Spec2	148.51	157.69	171.84	278.97	249.45	239.16	0.68328	5.18539	7.3946e-05	0.0011032	1.60568
FBgn0030318	rho-4	96.106	107.12	81.883	121.79	189.17	147.43	0.68537	4.45063	0.0014903	0.013851	1.60777
FBgn0260743	CG18347	285.31	404.06	323.28	480.15	566.01	584.47	0.68633	6.26321	0.0002467	0.0031195	1.61026
FBgn0243516	Vrp1	187.85	188.88	136.13	266.57	316.76	241.63	0.68686	5.2876	0.00037142	0.0043902	1.60855
FBgn0046114	Gclm	178.24	146.94	161.64	249.54	303.06	230.02	0.68714	5.21265	0.00018841	0.0024852	1.60762
FBgn0031782	WDR79	35.153	29.192	26.622	52.03	47.09	47.621	0.68951	2.8542	0.0060764	0.043063	1.61312
FBgn0028331	l(1)G0289	596.92	600.61	539.14	927.43	1139.3	734.94	0.69047	7.0404	0.00037492	0.0044209	1.61324
FBgn0023023	CRMP	96.113	101.25	90.043	142.69	173.47	147.45	0.69059	4.46488	0.00024996	0.0031525	1.61308
FBgn0014906	Hydr2	236.2	242.31	375.31	519.15	519.08	340.61	0.69193	6.0212	0.0023186	0.019888	1.61491
FBgn0028473	CG8801	3156.5	2614.6	2373.4	4473.6	4522.3	4171.7	0.69317	9.26864	8.5688e-05	0.0012611	1.61675
FBgn0035498	Fit1	579.87	588.92	559.59	945.41	978.47	871.41	0.69376	7.03566	3.0776e-05	0.00050117	1.61729
FBgn0000077	amx	42.708	34.998	48.048	61.382	77.408	65.061	0.69894	3.30639	0.0038171	0.029815	1.62103
FBgn0031256	CG4164	107.87	105.11	114.56	213.84	148.83	169.49	0.69931	4.65667	0.00038162	0.0044945	1.62472
FBgn0031418	CG3609	113.04	93.434	82.907	160.74	168.21	140.63	0.70071	4.47994	0.00037006	0.0043794	1.62271
FBgn0041604	dlp	94.007	108.09	88.007	152.18	166.46	153.21	0.70118	4.48531	0.00014493	0.0019756	1.62649
FBgn0032727	CG10623	142.06	159.68	134.04	243.94	209.8	256.17	0.70143	5.06571	9.4097e-05	0.0013583	1.62906
FBgn0262808	CG43179	45.083	62.287	84.817	116.37	117.72	78.266	0.70151	3.90328	0.0062372	0.043885	1.62527
FBgn0040336	Seipin	112	83.657	100.25	166.42	169.9	144.1	0.70198	4.51206	0.00025142	0.0031669	1.62355
FBgn0003748	Treh	271.27	272.55	283.36	507.8	473.44	364.78	0.7035	5.9824	9.4836e-05	0.0013649	1.62724
FBgn0024371	E2f2	78.049	88.586	93.071	147.52	155.41	119.85	0.70499	4.32947	0.00037219	0.004394	1.62792
FBgn0030431	CG4407	71.56	74.964	69.575	105.8	130.55	116.05	0.70567	4.07064	0.00029667	0.0036248	1.63073
FBgn0030055	CG12772	166.46	152.84	123.84	232.53	247.86	242.45	0.70585	5.09101	9.5008e-05	0.0013654	1.63118
FBgn0000416	Sap-r	2496.9	2923.2	2951.3	4859.4	4723.8	4081.4	0.70693	9.3168	4.4324e-05	0.00069076	1.6323
FBgn0052627	NnaD	508.37	663.01	419.51	706.98	908.15	984.5	0.70797	6.92552	0.0006962	0.0074984	1.63407
FBgn0053208	Mical	1708.5	1782.4	1063	2225.4	2767.3	2455.9	0.70983	8.44094	0.0008072	0.0084856	1.63565
FBgn0036196	CG11658	101.44	117.85	80.877	162.6	169.84	159.01	0.71049	4.53956	0.00021218	0.0027541	1.63726
FBgn0038149	CG9796	1108.5	1001.6	1185.6	2196.4	1816.1	1384.6	0.71182	7.97612	0.00034036	0.0040722	1.63762
FBgn0020272	mst	28.828	24.304	31.691	45.362	40.087	54.25	0.71255	2.7745	0.0070555	0.048662	1.64695
FBgn0033178	CG11127	114.2	107.08	97.212	181.55	175.79	164.87	0.71416	4.62508	6.8382e-05	0.0010265	1.63963
FBgn0024289	Sodh-1	284.13	335.88	282.37	564.54	569.73	346.51	0.7153	6.11484	0.00065807	0.0071562	1.64097
FBgn0034443	cer	1085.3	1438.7	1705.2	2646.3	2097.9	2200.8	0.71549	8.33789	0.00038346	0.0045053	1.64215
FBgn0039178	CG6356	577.94	770.02	741.64	1251.8	1271.9	907.77	0.71576	7.32245	0.00027695	0.0034354	1.64217
FBgn0039561	mfrn	207.26	246.32	216.89	352.59	390.28	360.85	0.71872	5.69142	1.6268e-05	0.00028534	1.64619
FBgn0033032	kune	67.546	92.456	129.81	183.53	176	117.79	0.72023	4.49562	0.0044858	0.034095	1.647
FBgn0038172	Adgf-D	575.52	468.15	572.85	886.78	924.43	852.78	0.72101	6.95618	3.0229e-05	0.00049309	1.64798
FBgn0027569	cert	545.58	469.15	478.78	867.93	806.8	788.97	0.72232	6.84322	1.9806e-05	0.00034067	1.6496
FBgn0001218	Hsc70-3	3839.2	4566.3	4645.4	8178.8	7486.5	5871.6	0.72269	9.96691	9.9105e-05	0.001418	1.65022
FBgn0261547	Exn	480.43	426.34	399	678.74	765.86	710	0.72271	6.65032	2.6022e-05	0.00043093	1.65006
FBgn0037553	CG18249	170.04	256.08	229.13	412.33	355.8	313.58	0.72282	5.66113	0.00020605	0.0026923	1.65084
FBgn0033373	CG8080	546.68	494.47	494.12	866.95	877.26	792.52	0.72478	6.88436	1.5524e-05	0.00027424	1.6523
FBgn0031689	Cyp28d1	337.58	330.9	465.36	842.71	635.4	397.73	0.72645	6.45	0.0038035	0.029748	1.65441
FBgn0033890	Ctf4	60.797	46.676	58.298	90.745	99.619	84.859	0.73447	3.71334	0.00062127	0.0068242	1.66026
FBgn0011659	Mlh1	26.772	35.075	29.674	53.918	47.026	52.177	0.73621	2.89354	0.0033621	0.027015	1.67307
FBgn0035802	CG33275	300	301.79	236.37	485.03	506.97	404.08	0.7368	6.02211	4.386e-05	0.00068462	1.66565
FBgn0002989	okr	24.566	22.369	26.585	41.601	37.599	43.981	0.73903	2.59491	0.0064501	0.045123	1.67548
FBgn0051064	CG31064	140.92	149.95	112.58	233.55	260.18	179.17	0.73969	4.97733	0.0002642	0.0032981	1.66786
FBgn0020415	Idgf2	572.62	694.03	853.08	1050.2	1199.6	1295.5	0.74168	7.35942	0.00011581	0.0016238	1.67252
FBgn0086347	Myo31DF	216.72	207.34	189.28	339.39	342.98	343.38	0.74168	5.57798	5.4199e-06	0.0001063	1.6724
FBgn0036133	CG7638	106.71	86.589	101.27	176.85	170.71	144.15	0.74194	4.53024	9.0408e-05	0.0013147	1.66925
FBgn0015828	TfIIEalpha	150.51	140.16	134.03	212.62	250.5	248.14	0.74341	5.05377	2.5185e-05	0.00041848	1.67474
FBgn0030808	RhoGAP15B	296.65	204.34	242.46	379.97	443.46	422.23	0.74517	5.85534	5.6354e-05	0.00085909	1.67551
FBgn0036043	CG8177	55.299	32.064	36.854	63.279	72.965	71.867	0.74546	3.31738	0.0033681	0.027042	1.67538
FBgn0037878	CG6693	53.541	68.151	73.62	113.47	103.63	111.34	0.74653	3.95476	0.00025279	0.0031759	1.68162
FBgn0041710	yellow-f	862	1176.9	1051.6	1717.8	1454.7	2014.5	0.74658	7.9055	0.0001139	0.001604	1.67837
FBgn0050051	CG30051	21.549	37.02	38.835	63.439	45.158	55.664	0.74742	2.98602	0.0066233	0.046236	1.68639
FBgn0031261	nAcRbeta-21C	1691.4	1316	1558	2848.6	2810.1	2011	0.74866	8.46866	0.00011192	0.0015851	1.67996
FBgn0034618	CG9485	623.55	520.73	574.92	1012.6	927.65	948.99	0.74903	7.06236	1.0739e-05	0.00019794	1.68057
FBgn0015036	Cyp4ae1	54.404	46.702	49.11	83.181	98.054	71.094	0.75265	3.58602	0.000864	0.0089576	1.67977
FBgn0034367	sec6	56.699	75.983	60.375	102.05	106.27	118.14	0.75289	3.94311	0.00022124	0.0028532	1.691
FBgn0032906	RPA2	64.837	39.873	32.801	83.243	72.759	76.602	0.75862	3.46761	0.0037512	0.029512	1.69153
FBgn0037801	CG3999	1492.1	2266.2	1710.5	2769	3223.3	3263.1	0.75891	8.7355	9.5424e-05	0.0013694	1.6924
FBgn0033717	CG8839	1854.8	1528.2	1479.3	3060.4	2850.3	2322.9	0.76005	8.56662	3.4204e-05	0.00054609	1.69335
FBgn0031611	CG17840	91.56	59.331	56.316	112.47	119.21	119.45	0.76172	4.04509	0.00061806	0.0068042	1.69459
FBgn0030035	CG11190	127.17	135.29	155.46	232.55	237.51	238.96	0.76174	5.04241	1.29e-05	0.00023208	1.69654
FBgn0044020	Roc2	77.126	113.92	120.66	184.39	169.67	176.35	0.76461	4.62737	0.00014208	0.0019394	1.70164
FBgn0250869	CG42240	81.2	98.372	73.695	134.19	169.3	127.88	0.76915	4.33398	0.00020761	0.0027092	1.70322
FBgn0086706	pix	2792.4	2410.1	2270	4511.5	4298.4	3931.7	0.76993	9.19238	8.1794e-06	0.00015514	1.70513
FBgn0032167	CG5853	391.85	379.64	336.6	633.42	707.71	547.93	0.77024	6.44388	1.6623e-05	0.00029103	1.70479
FBgn0040268	Top3alpha	41.667	41.85	43.982	77.565	68.481	71.956	0.7717	3.37163	0.0005345	0.0060059	1.70983
FBgn0000454	Dip-B	1326.4	1521.5	1452.6	2180.9	2474.6	2695.7	0.77324	8.39819	7.4897e-06	0.00014289	1.70938
FBgn0030638	CG11655	66.123	53.506	58.316	95.436	104.66	104.36	0.77475	3.83903	0.00012276	0.0016994	1.71096
FBgn0003888	betaTub60D	1552.8	2065.7	1227.7	2240.4	2939.5	3139.9	0.77956	8.57427	0.00033046	0.0039635	1.71677
FBgn0033136	Tsp42Eo	53.218	39.893	33.805	73.747	76.396	67.436	0.77976	3.36811	0.0011688	0.011508	1.71435
FBgn0263083	CG43351	52.414	69.167	54.24	80.206	80.198	142.88	0.78094	3.82771	0.0033389	0.026903	1.72496
FBgn0031973	Spn28D	133.5	136.28	135.04	207.89	273.95	213.67	0.78204	5.00859	2.3411e-05	0.00039166	1.71807
FBgn0028394	CG17834	59.718	54.515	46.071	97.416	94.359	83.726	0.78282	3.69681	0.00028221	0.0034829	1.71862
FBgn0034614	CG9752	24.726	47.796	29.695	64.342	51.221	61.419	0.7848	3.07561	0.0041647	0.032221	1.73143
FBgn0003162	Pu	1610.6	2392.8	1781.1	3285.2	3233.4	3448.8	0.78487	8.83276	3.3381e-05	0.00053557	1.72312
FBgn0032006	Pvr	1358.3	1263.5	1175.4	2263.3	2276.6	2004.8	0.78553	8.22639	3.7388e-06	7.6233e-05	1.72356
FBgn0024179	wit	122.86	122.63	140.12	236.41	242.87	184.88	0.78638	4.94164	2.7713e-05	0.00045585	1.72236
FBgn0032643	CG6453	323.59	308.54	347.79	664.79	540.93	485.31	0.78758	6.27836	1.7306e-05	0.00030191	1.72568
FBgn0030040	CG15347	122.91	146.04	140.14	263.87	216.74	226.33	0.78797	5.02855	1.2462e-05	0.00022545	1.72808
FBgn0050091	CG30091	414.43	436.08	478.73	841.5	777.74	675.5	0.788	6.71678	6.5139e-06	0.00012525	1.72635
FBgn0036922	CG14182	30.943	26.258	30.682	52.966	54.119	44.304	0.78821	2.86443	0.0018004	0.016018	1.72262
FBgn0015033	Cyp4d8	215.58	162.5	194.36	380.19	337.02	270.78	0.78907	5.50787	3.6796e-05	0.00058461	1.72593
FBgn0011703	RnrL	74.952	129.6	82.905	174.94	150.7	172.76	0.7906	4.52892	0.00032019	0.0038726	1.73382
FBgn0030041	CG12116	4532	3226.8	4327.2	7677.7	7112.6	6126.7	0.7914	9.89926	2.912e-05	0.00047659	1.73068
FBgn0031673	CG31650	43.774	48.706	35.843	76.596	78.114	67.474	0.79215	3.39235	0.0005831	0.0064777	1.73144
FBgn0085261	CG34232	39.574	42.826	47.038	75.634	73.7	75.404	0.79337	3.40625	0.00033026	0.0039635	1.73626
FBgn0262587	CG43124	72.842	74.871	143.06	233.86	141.98	129.33	0.79625	4.54772	0.0060722	0.043063	1.73733
FBgn0031432	Cyp309a1	2338.7	2147.3	2353.9	4652.5	3875.6	3372.8	0.7991	9.08327	9.3743e-06	0.00017509	1.73992
FBgn0011774	Irbp	26.761	27.234	35.768	53.903	50.527	52.216	0.8004	2.90379	0.0013633	0.012979	1.74511
FBgn0040236	c11.1	812.42	614.18	602.59	1237.6	1166.1	1132.4	0.80142	7.33388	9.9739e-06	0.00018453	1.74262
FBgn0051769	CG31769	164.58	171.29	221.92	432.37	313.73	225.85	0.8017	5.47957	0.00054948	0.0061422	1.7425
FBgn0034741	CG4269	512.77	714.58	572.89	880.01	1134.6	1126.2	0.8025	7.16262	2.9082e-05	0.00047659	1.74466
FBgn0030079	CG7267	560.88	693.07	823.42	1230.9	1347.3	1051.4	0.80515	7.37014	3.1757e-05	0.00051628	1.74721
FBgn0003308	ry	440.83	397.18	287.55	700.6	680.04	588.46	0.80716	6.48987	3.6487e-05	0.00058159	1.74944
FBgn0028985	Spn4	804.27	952.99	965.67	1556.1	1716	1494.4	0.80772	7.76145	3.1669e-06	6.5666e-05	1.7505
FBgn0042135	CG18812	272.32	299.85	247.6	475.52	485.34	476.81	0.80996	6.03683	1.1727e-06	2.6879e-05	1.75375
FBgn0032078	C1GalTA	65.193	69.111	72.619	135.28	119.14	109.28	0.81418	4.07619	3.8205e-05	0.00060309	1.75766
FBgn0031022	CG12204	39.432	39.945	24.61	61.45	62.624	59.234	0.81639	3.1159	0.0010315	0.010375	1.7628
FBgn0030122	CG16892	109.98	117.82	95.177	173.88	187.74	208.57	0.81736	4.71094	8.4452e-06	0.00015987	1.76542
FBgn0038981	CG5346	171.96	168.38	186.16	277.85	284.46	368.39	0.81943	5.4094	5.18e-06	0.00010221	1.76771
FBgn0261274	Ero1L	140.84	139.24	94.195	233.56	222.08	205.52	0.82101	4.92183	3.2995e-05	0.00053112	1.76651
FBgn0002524	lace	271.17	231.63	255.74	496.44	502.78	340.55	0.82208	5.93227	2.3012e-05	0.00038765	1.76625
FBgn0025815	Mcm6	114.32	140.23	106.43	181.38	224.76	235.24	0.82687	4.87525	1.7869e-05	0.00031007	1.77677
FBgn0014033	Sr-CI	20.364	28.265	22.516	50.209	41.107	35.074	0.8274	2.60317	0.0034102	0.027357	1.77651
FBgn0004509	Fur1	383.33	367.95	350.9	652.32	763.57	543.4	0.83073	6.47444	6.1755e-06	0.00011921	1.77765
FBgn0052758	CG32758	1228	1354.1	953.5	1900.2	2350.6	2043	0.83191	8.15312	1.1587e-05	0.00021157	1.78012
FBgn0032615	CG6012	37.54	64.339	44.014	68.866	77.825	114.16	0.832	3.59827	0.0021671	0.018753	1.78796
FBgn0025693	CG11163	84.46	108.1	89.018	193.94	148.07	160.21	0.83264	4.52545	2.4116e-05	0.00040276	1.78359
FBgn0038523	CG7587	1524.2	1707.3	3074.9	3538.6	3155	4544.5	0.83344	8.98812	0.0010606	0.010635	1.78202
FBgn0052698	CG32698	1250.6	1319	1448.5	2557.4	2661	1941.3	0.83355	8.3384	6.1006e-06	0.00011847	1.78186
FBgn0036199	Bmcp	68.193	53.517	49.14	102.1	122.17	79.358	0.83367	3.81711	0.00043326	0.0050062	1.77716
FBgn0046685	Wsck	123.8	113.88	106.42	197.55	229.21	185.85	0.83397	4.80933	4.9254e-06	9.758e-05	1.78033
FBgn0259111	Ndae1	169.47	112.87	103.39	232.58	260.12	195.28	0.83658	4.97389	0.00011778	0.001649	1.78358
FBgn0022338	dnk	36.267	37.012	27.658	60.505	67.067	52.447	0.83669	3.08589	0.00078673	0.0082882	1.78348
FBgn0031702	fusl	574.56	613.27	574.93	1020.1	1196.5	931.87	0.83707	7.15399	1.6571e-06	3.612e-05	1.7861
FBgn0050269	CG30269	139.75	106.05	120.72	214.58	255.05	186	0.84163	4.90376	2.1214e-05	0.00036109	1.7888
FBgn0035348	CG16758	1727.1	3005.1	2380.5	4140.8	4674.2	3935.2	0.84199	9.1671	6.2355e-05	0.00094469	1.7926
FBgn0036663	CG9674	2037.4	1704.4	1601	3015.8	3301.3	3277.1	0.84457	8.75621	1.1843e-06	2.7019e-05	1.79573
FBgn0016078	wun	60.811	59.394	48.118	86.869	108.17	107.75	0.84508	3.80576	8.6834e-05	0.0012722	1.79886
FBgn0000256	capu	181.42	145.97	157.55	323.43	311.42	236	0.84675	5.3069	6.7379e-06	0.00012905	1.79579
FBgn0034396	CG15097	29.81	28.252	17.443	34.85	41.893	59.789	0.84695	2.69581	0.0066221	0.046236	1.80825
FBgn0034371	SP2637	188.03	221.98	196.43	376.3	366.13	350.46	0.84914	5.62974	3.0654e-07	8.2648e-06	1.80214
FBgn0033769	CG8768	26.87	45.808	38.866	69.981	61.576	70.681	0.8514	3.23757	0.00070795	0.007614	1.81308
FBgn0034943	Fmo-1	159.23	165.45	209.65	345.13	338.81	281.09	0.85365	5.45071	2.6941e-06	5.634e-05	1.80606
FBgn0037236	Skp2	47.938	31.088	42.954	73.739	74.615	71.978	0.85461	3.35905	0.00027848	0.0034449	1.8063
FBgn0027594	drpr	229.56	226.81	207.69	358.2	472.04	371.44	0.85642	5.76373	1.4001e-06	3.1143e-05	1.8096
FBgn0261560	Thor	784.88	850.81	665	1313.1	1652	1202.2	0.85721	7.55035	6.0307e-06	0.00011757	1.81133
FBgn0050090	CG30090	543.53	435.03	607.59	1094	806.44	974.42	0.85779	7.01556	9.6892e-06	0.00018063	1.81248
FBgn0034194	CG15611	41.635	39.904	39.902	79.466	60.557	81.012	0.85822	3.35868	0.00026395	0.0032981	1.8201
FBgn0038536	CG7655	18.226	20.431	25.545	42.588	41.227	32.73	0.86124	2.48316	0.0024203	0.020634	1.81529
FBgn0261553	CG42671	429.02	321.19	295.7	601.22	659.47	640.34	0.86223	6.41955	4.5806e-06	9.149e-05	1.81758
FBgn0025682	scf	1923.3	2069.5	1693.1	3686.2	3280.4	3419.9	0.86918	8.86182	3.7236e-07	9.7964e-06	1.82671
FBgn0039207	CG5789	616.23	727.2	575.98	1336	1167	1003.9	0.86953	7.29752	2.3899e-06	5.0409e-05	1.82707
FBgn0086532	Spt-I	142.07	143.08	155.48	258.05	252.8	295.56	0.86982	5.18687	4.5806e-07	1.1675e-05	1.83013
FBgn0002878	mus101	68.309	62.283	64.452	125.78	113.06	119.5	0.87639	4.03259	5.4124e-06	0.0001063	1.83723
FBgn0026239	gukh	433.36	365.02	310.03	594.53	773.78	667.1	0.87706	6.5125	4.27e-06	8.5989e-05	1.83633
FBgn0038346	CG14872	188.66	103.08	131.99	302.68	288.35	188.64	0.88092	5.13688	0.0003191	0.0038651	1.84002
FBgn0033226	CG1882	309.63	240.35	328.33	588.12	557.42	471.35	0.88124	6.18071	1.998e-06	4.3071e-05	1.84091
FBgn0031678	CG31918	25.658	32.163	22.536	63.511	47.071	37.527	0.88176	2.80209	0.0024099	0.020581	1.84314
FBgn0039238	CG7016	76.058	114.91	116.58	190.02	176.47	201.7	0.88222	4.68294	1.2191e-05	0.00022136	1.84748
FBgn0038291	CG3984	48.209	40.788	90.9	142.98	121.07	68.099	0.88375	3.92504	0.0062215	0.043806	1.84633
FBgn0052666	Drak	217.71	193.71	166.8	385.8	378.28	302.03	0.88399	5.58288	1.2676e-06	2.852e-05	1.84378
FBgn0032479	CG16974	626.79	559.68	591.29	1079.6	1211.9	990.98	0.8851	7.19702	2.5328e-07	7.0421e-06	1.84641
FBgn0030347	CG15739	40.462	28.189	32.744	63.347	58.179	66.029	0.88542	3.12317	0.00026978	0.0033549	1.84975
FBgn0026751	XRCC1	22.453	20.415	27.593	38.697	45.502	46.311	0.88548	2.62499	0.0011967	0.011735	1.85223
FBgn0033196	CG1358	105.59	103.23	66.577	193.93	174.11	140.79	0.8866	4.5268	5.5892e-05	0.00085338	1.84762
FBgn0050085	CG30085	96.019	85.653	78.8	171.17	146.42	164.68	0.8873	4.44902	2.7976e-06	5.838e-05	1.85152
FBgn0004107	cdc2c	29.964	44.862	24.604	66.223	63.492	54.739	0.88874	3.10013	0.00083049	0.0086838	1.85511
FBgn0014861	Mcm2	71.629	82.757	80.809	156.99	142.27	139.33	0.89781	4.31114	2.0306e-06	4.3581e-05	1.86479
FBgn0040398	CG14629	5784.7	5084.1	5306.2	10443	10552	9157.8	0.89855	10.3884	9.5336e-08	2.9249e-06	1.86416
FBgn0039881	CG1971	29.949	33.1	33.751	61.457	56.469	63.717	0.90223	3.07208	0.00013051	0.0017991	1.87648
FBgn0053099	CG33099	219.12	315.47	261.89	453.7	475.77	561.11	0.90248	6.0554	1.561e-06	3.4177e-05	1.87146
FBgn0031126	Cyp6v1	152.82	208.41	146.34	313.86	325.02	312.11	0.90453	5.41106	7.2545e-07	1.7574e-05	1.87361
FBgn0031479	Prx6005	36.195	19.392	34.753	65.329	54.817	48.969	0.90723	2.97581	0.00134	0.012845	1.87198
FBgn0263005	CG43313	114.17	107.08	90.066	200.44	192.02	193.77	0.91258	4.71824	4.1415e-07	1.0751e-05	1.88307
FBgn0034909	CG4797	152.59	107.97	149.33	251.45	269.34	251.81	0.91555	5.11132	1.125e-06	2.6029e-05	1.8849
FBgn0040290	RecQ4	35.318	41.869	41.932	82.312	75.45	67.498	0.91853	3.36805	5.5106e-05	0.00084665	1.89105
FBgn0261808	cu	163.4	143.04	185.12	285.43	287.92	356.89	0.91856	5.37432	4.5702e-07	1.1675e-05	1.89242
FBgn0013278	Hsp70Bb	610.83	628.84	580.05	1379.5	943.59	1117.2	0.91857	7.25269	8.3571e-07	2.0047e-05	1.89056
FBgn0067102	GlcT-1	155.78	147.01	109.53	293.19	251.14	235.75	0.92014	5.12329	1.9844e-06	4.2873e-05	1.89193
FBgn0029002	miple2	147.64	234.67	210.71	359.21	464.48	301	0.92339	5.64549	2.0142e-05	0.00034585	1.89655
FBgn0040334	Tsp3A	71.508	65.204	66.501	123.81	153.9	107.12	0.92456	4.11937	1.3207e-05	0.00023588	1.89373
FBgn0025454	Cyp6g1	2722.2	3093.5	3127.2	6735.2	5562.2	4679.1	0.92474	9.55086	6.9721e-07	1.7059e-05	1.89832
FBgn0259113	DNApol-alpha180	58.94	99.385	74.692	186.46	155.29	101.65	0.92786	4.31764	0.00033005	0.0039635	1.90287
FBgn0026403	Ndg	560.71	594.76	614.8	1280.2	1208.3	878.8	0.92797	7.21892	8.776e-07	2.0898e-05	1.90214
FBgn0031461	daw	821.29	896.52	900.22	1735.8	1849.8	1396	0.92832	7.78257	2.1853e-07	6.1815e-06	1.9028
FBgn0033051	dream	107.92	117.79	117.64	207.94	245.52	199.76	0.92872	4.86751	3.0275e-07	8.1852e-06	1.90249
FBgn0037683	CG18473	361.84	235.46	340.62	642.95	692.38	449.63	0.9291	6.30625	2.3279e-05	0.00039078	1.9031
FBgn0032253	CG5322	185.06	346.69	247.58	466.02	543.86	476.91	0.93108	6.04239	1.614e-05	0.0002841	1.90778
FBgn0033320	CG8586	898.15	1106.9	777.54	1421.7	1928.6	1966	0.93376	7.87411	3.3755e-06	6.9259e-05	1.91056
FBgn0027611	CG6206	1687.5	2417.1	2064.4	4141.8	4337.2	3324.1	0.93606	9.0229	1.4261e-06	3.1578e-05	1.91329
FBgn0027280	l(1)G0193	320.45	346.54	363.14	645.69	739.44	586.15	0.93665	6.44596	1.1156e-07	3.3645e-06	1.91362
FBgn0035102	CG7049	42.573	26.225	34.782	69.04	69.534	59.368	0.93776	3.18354	0.00021326	0.0027645	1.91101
FBgn0015793	Rab-RP3	69.076	32.034	41.972	90.747	94.368	89.388	0.94143	3.63704	0.00030957	0.0037683	1.9185
FBgn0033381	CG11784	69.381	66.189	63.439	116.21	125.13	142.43	0.94393	4.10542	1.5958e-06	3.4863e-05	1.92841
FBgn0014427	CG11899	753.93	903.43	590.35	1324.4	1465.4	1535.7	0.94412	7.57353	1.0273e-06	2.4111e-05	1.9244
FBgn0038533	CG7523	79.214	107.1	112.49	206.16	213.75	155.92	0.94703	4.68202	5.1398e-06	0.00010162	1.92712
FBgn0004885	tok	488.1	603.6	454.26	861.12	1139.9	983.78	0.94894	7.03796	5.1356e-07	1.2888e-05	1.93071
FBgn0032026	CG7627	924.83	964.66	952.4	2045	1956.9	1513.2	0.95672	7.9194	1.1173e-07	3.3645e-06	1.94065
FBgn0036752	Adgf-A	107.87	104.14	115.58	246.89	215.24	173.32	0.95751	4.81897	8.6228e-07	2.0583e-05	1.93977
FBgn0264718	CG43986	19.231	21.431	17.407	35.895	35.045	42.737	0.95845	2.41155	0.00064164	0.0070115	1.95762
FBgn0039528	dsd	138.79	147.02	114.62	241.96	277.11	259.87	0.9593	5.10751	1.171e-07	3.4939e-06	1.94526
FBgn0039208	Esyt2	212.51	226.84	193.38	474.74	431.41	326.55	0.96299	5.76364	2.8937e-07	7.8888e-06	1.94822
FBgn0022772	Orc1	32.059	34.075	32.739	81.481	59.889	51.423	0.96378	3.13798	0.00022061	0.0028522	1.94991
FBgn0030645	CG6308	17.09	17.524	16.375	31.162	35.217	33.643	0.9675	2.24055	0.00095625	0.0098101	1.96164
FBgn0011762	DNApol-alpha50	7.6124	18.544	14.317	29.348	23.882	26.692	0.9679	1.94081	0.0066421	0.046334	1.97468
FBgn0031741	CG11034	85.477	118.88	63.511	158.75	137.58	228.89	0.96807	4.54127	0.00014057	0.0019214	1.96074
FBgn0001296	kar	131.33	112.87	141.14	283.73	296.24	174.79	0.97171	5.05993	1.3096e-05	0.00023431	1.95869
FBgn0043806	CG32032	177.35	203.47	188.23	413.24	405.79	296.37	0.97185	5.61751	1.4902e-07	4.3537e-06	1.96011
FBgn0052251	CG32251	26.824	37.99	36.812	72.853	67.753	59.385	0.97451	3.18414	7.8528e-05	0.0011662	1.96791
FBgn0031875	CG3430	26.789	30.163	37.812	71.949	54.659	60.394	0.97662	3.08901	0.00011463	0.0016096	1.97334
FBgn0020633	Mcm7	96.142	103.2	97.191	195.69	176.4	214.37	0.98036	4.69469	6.5159e-08	2.0772e-06	1.97772
FBgn0036765	CG7408	40.691	39.861	63.345	122.17	103.92	58.778	0.98568	3.67607	0.00083743	0.0087377	1.97967
FBgn0040256	Ugt86Dd	44.684	22.304	38.853	76.638	79.99	52.677	0.98711	3.24612	0.00064344	0.0070205	1.97754
FBgn0040827	CG13315	1547.3	1119.3	1749.2	3454.7	3009.7	2299.9	0.98904	8.57591	4.2854e-06	8.6122e-05	1.98476
FBgn0029898	CG14439	35.336	49.699	37.87	78.436	74.422	92.538	0.98954	3.46037	2.2189e-05	0.00037572	1.99663
FBgn0035164	CG13901	18.092	17.541	10.27	30.244	29.083	32.413	0.99085	2.11637	0.0016891	0.01525	1.99856
FBgn0003016	osp	201.95	279.48	190.33	469.91	471.73	394.75	0.99194	5.86918	2.497e-07	6.9626e-06	1.98939
FBgn0035160	CG13897	78.914	67.152	62.432	130.41	147.62	136.93	0.99348	4.20141	4.1645e-07	1.0782e-05	1.99023
FBgn0052412	QC	66.247	75.958	64.468	136.12	137.18	139.19	0.99447	4.19144	1.6599e-07	4.778e-06	1.99586
FBgn0038716	CG7342	799.93	913.09	841.92	1781.2	1949.4	1361.3	0.99508	7.7915	1.1767e-07	3.5003e-06	1.99296
FBgn0038972	CG7054	37.341	34.06	33.768	77.591	57.994	75.273	0.99824	3.24726	3.3597e-05	0.00053727	2.00494
FBgn0014029	2013-09-02	321.37	327.1	260.92	585.16	620.84	618.28	1.00397	6.31165	1.0208e-08	3.742e-07	2.00605
FBgn0034010	CG8157	167.29	86.523	114.6	391.96	239.14	109.18	1.00463	5.02073	0.0055656	0.04017	2.00938
FBgn0029932	CG4607	77.046	98.333	103.29	200.48	199.06	161.6	1.00998	4.62416	2.7104e-07	7.4722e-06	2.01364
FBgn0033479	CG2292	20.305	19.455	22.495	46.379	48.227	30.578	1.01164	2.53416	0.00063535	0.0069555	2.01083
FBgn0036769	Tsp74F	24.433	19.473	12.323	47.402	32.376	33.813	1.01176	2.3982	0.0015408	0.014199	2.02015
FBgn0051956	pgant4	36.498	63.352	49.108	90.682	81.076	130.41	1.01343	3.74361	0.00010618	0.0015127	2.02854
FBgn0038878	CG3301	65.093	51.541	66.471	117.18	126.95	126.41	1.01685	4.03352	3.6125e-07	9.5299e-06	2.02365
FBgn0033310	rgr	384.32	373.83	279.35	579.36	762.48	766.55	1.02264	6.51339	1.8122e-07	5.1859e-06	2.03218
FBgn0000083	AnnIX	1481.3	1544.8	1704.3	3811.1	3439.4	2365	1.02352	8.69806	3.9245e-07	1.0242e-05	2.0327
FBgn0036741	CG7510	150.67	182.07	160.62	337.51	375	290.38	1.02394	5.44788	8.8971e-09	3.3491e-07	2.03278
FBgn0083972	CG34136	283.23	326.05	458.18	753.52	679.79	738.91	1.02449	6.55561	3.1784e-07	8.5459e-06	2.03494
FBgn0051133	Slimp	47.053	55.507	51.152	128.76	96.733	87.37	1.02476	3.79316	7.8351e-06	0.0001489	2.03538
FBgn0032117	FucTB	36.426	44.781	50.094	95.53	83.02	90.478	1.03059	3.57766	4.1164e-06	8.3067e-05	2.04894
FBgn0259144	CG42259	39.447	28.178	38.855	53.715	58.827	105.76	1.0311	3.28318	0.00072906	0.0077897	2.05017
FBgn0085308	CG34279	344.7	208.19	308.91	591.82	552.03	618.17	1.0319	6.25277	2.5528e-07	7.0776e-06	2.04458
FBgn0036549	CG10516	65.188	71.069	69.561	118.99	138	165.47	1.03271	4.21159	4.8176e-07	1.2152e-05	2.05259
FBgn0015572	alpha-Est4	133.59	136.25	171.8	349	275.02	279.78	1.03281	5.29576	3.1612e-08	1.0559e-06	2.04646
FBgn0039073	CG4408	449.91	749.63	657.76	1322.7	1340.3	1138.3	1.03304	7.35788	5.0066e-07	1.2596e-05	2.04668
FBgn0026143	CDC45L	62.922	56.455	50.157	119.14	110.5	118.29	1.03548	3.93814	2.444e-07	6.8537e-06	2.05227
FBgn0003129	Poxm	11.886	28.324	14.353	45.484	41.274	25.971	1.04167	2.38178	0.004487	0.034095	2.06603
FBgn0035496	CG14990	241.63	320.25	405	731.84	706.69	552.67	1.04215	6.42514	9.1945e-07	2.1788e-05	2.05941
FBgn0036341	Syx13	485.88	553.94	399.03	923.58	1067.7	976.82	1.04439	6.99812	1.2166e-08	4.3936e-07	2.06283
FBgn0030955	CG6891	1659.7	2431.7	1748.3	4017	3894.4	4192.4	1.05132	9.02058	3.6495e-08	1.2067e-06	2.07267
FBgn0037185	CG11367	13.982	19.476	21.46	44.518	41.258	28.226	1.05329	2.39395	0.00083533	0.0087251	2.07586
FBgn0261984	Ire1	247.69	228.74	227.12	551.29	522.36	389.19	1.05707	5.97814	1.2629e-08	4.5441e-07	2.07923
FBgn0033724	CG8501	236.27	412.89	274.2	568.07	626.73	728.13	1.05725	6.36948	1.2549e-06	2.8298e-05	2.08254
FBgn0003480	spn-B	16.956	12.66	6.1839	29.378	21.265	24.403	1.06099	1.83242	0.0050123	0.03725	2.09626
FBgn0016123	Aph-4	83.145	50.527	77.719	168.4	110.95	162.17	1.06103	4.266	9.9482e-06	0.0001844	2.08864
FBgn0051777	CG31777	171.91	159.62	170.83	298.6	412	343.45	1.06963	5.50421	4.0443e-09	1.6156e-07	2.0982
FBgn0025456	CREG	1041.5	1735.7	1586.6	3026.2	3282.5	2872.5	1.07296	8.61523	1.8935e-07	5.4027e-06	2.10395
FBgn0031888	Pvf2	9.6555	15.62	8.2106	24.589	19.524	27.665	1.08094	1.76369	0.0033398	0.026903	2.14352
FBgn0053459	CG33459	216.93	218.96	311.91	622.25	553.16	408.97	1.08353	6.08395	3.212e-07	8.6125e-06	2.11872
FBgn0031897	CG13784	633.22	573.31	627.08	1292.4	1449.4	1154.6	1.08775	7.37597	4.4272e-10	1.9606e-08	2.12499
FBgn0259147	CG42262	44.044	59.343	95.011	196.98	146.7	78.693	1.08842	4.19714	0.00095026	0.0097691	2.12892
FBgn0015271	Orc5	12.847	12.64	16.349	33.137	28.221	27.936	1.08874	2.05382	0.00067442	0.0073095	2.13438
FBgn0261922	PI4KIIIalpha	687.55	595.72	520.76	1146.7	1406.5	1286.5	1.08979	7.35408	2.0404e-09	8.4261e-08	2.1284
FBgn0086901	cv-c	1085.9	1026	730.51	1841.5	2235.6	1998.8	1.096	8.01304	2.1026e-08	7.246e-07	2.13759
FBgn0030048	CG12112	16.154	22.383	29.617	48.202	49.747	48.742	1.1	2.71717	6.6108e-05	0.00099692	2.15235
FBgn0046687	Tre1	38.476	42.846	38.882	82.212	84.847	91.526	1.10015	3.50029	4.7642e-07	1.2048e-05	2.15122
FBgn0029830	Grip	98.398	148.07	102.34	200.24	263.34	290.76	1.11	5.01187	3.0004e-07	8.1344e-06	2.16262
FBgn0037612	CG8112	111.09	157.85	70.702	205.95	302.37	229.88	1.11902	4.97939	1.4836e-05	0.00026256	2.17347
FBgn0036461	CG10006	35.385	58.491	39.923	158.38	75.003	58.808	1.12438	3.66656	0.0012613	0.012233	2.18381
FBgn0041087	wun2	8.6405	15.604	13.294	21.65	31.904	28.949	1.12449	1.93792	0.0013342	0.012801	2.19782
FBgn0040850	CG15210	69.687	128.6	102.29	235.47	190.91	230.72	1.12491	4.81034	3.5664e-07	9.4336e-06	2.18613
FBgn0025832	Fen1	19.239	16.518	23.501	53.069	34.87	41.827	1.12578	2.54232	0.00014845	0.0020151	2.18985
FBgn0033304	Cyp6a13	213.32	160.58	142.26	485.27	287.53	356.3	1.12895	5.58353	4.7493e-07	1.2042e-05	2.1875
FBgn0010222	Nmdmc	192.5	259.9	322.14	390.16	689.09	621.53	1.13417	6.16912	2.288e-06	4.8469e-05	2.19586
FBgn0011704	RnrS	110.07	137.31	109.49	256.18	250.26	279.41	1.13599	5.06231	3.9824e-10	1.7961e-08	2.20206
FBgn0030993	Mec2	365.14	329.97	322.26	712.78	791.58	732.07	1.13646	6.56197	2.4941e-11	1.3123e-09	2.19825
FBgn0000477	DNaseII	894.85	735.83	947.24	2000.5	2100.2	1573.5	1.13847	7.90126	1.7185e-09	7.2184e-08	2.20108
FBgn0031693	Cyp4ac1	152.98	198.56	261.78	536.23	489.82	324.42	1.13874	5.8375	1.1427e-06	2.6315e-05	2.2019
FBgn0262588	CG43125	11.831	12.628	21.432	46.511	33.406	21.375	1.13968	2.21093	0.0027578	0.022952	2.20723
FBgn0033526	Caf1-105	16.06	24.398	12.317	29.176	43.007	45.016	1.14084	2.39863	0.00052556	0.0059259	2.22073
FBgn0264326	DNApol-epsilon	73.775	91.541	79.802	189.12	191.34	160.38	1.14146	4.53007	1.8823e-09	7.8058e-08	2.20645
FBgn0260746	Ect3	373.66	329.97	323.29	900.21	782.07	589.94	1.1463	6.58202	4.9231e-09	1.9273e-07	2.21266
FBgn0032638	CG6639	1071.4	1749.3	1604	3429.9	3349.2	3141.6	1.1647	8.69799	8.6537e-09	3.27e-07	2.24212
FBgn0034389	Mctp	34.042	18.428	29.653	77.694	56.44	50.227	1.16807	3.01367	5.5705e-05	0.00085319	2.24494
FBgn0028939	nimC2	1830.7	3290.3	2415.3	5385.9	6638.8	5046.6	1.17959	9.47597	1.159e-07	3.4688e-06	2.26521
FBgn0036857	CG9629	732.68	832.29	821.45	1980.7	1756.8	1685.8	1.1842	7.82182	5.9621e-12	3.3343e-10	2.27257
FBgn0041183	TepI	52.693	107.13	119.6	258.29	219.57	158.41	1.1859	4.74764	1.4473e-05	0.00025708	2.27709
FBgn0029093	cathD	10767	10732	11543	25704	24582	24933	1.1868	11.6127	5.1634e-13	3.4145e-11	2.27647
FBgn0037206	CG12768	38.425	45.81	26.656	89.853	79.618	84.698	1.19203	3.44913	7.2185e-07	1.753e-05	2.29206
FBgn0035282	CG13936	11.857	14.58	23.473	46.436	32.363	36.061	1.19511	2.35788	0.00023079	0.0029564	2.30134
FBgn0030174	CG15312	19.168	16.545	14.342	34.927	41.245	39.421	1.2032	2.36508	3.2256e-05	0.00052266	2.30932
FBgn0039882	CG11576	146.4	178.18	159.59	370.58	384.2	365.49	1.20916	5.54766	8.9017e-13	5.6572e-11	2.31379
FBgn0261612	Cng	24.407	13.59	15.365	27.24	49.148	47.339	1.20963	2.4541	0.00044211	0.0051025	2.31863
FBgn0033913	CG8468	263.74	270.63	231.23	497.12	792.33	481.95	1.21057	6.20485	1.7201e-08	5.9909e-07	2.31374
FBgn0003475	spir	95.053	98.323	93.102	219.32	233.34	211.26	1.21245	4.80009	6.5441e-12	3.6185e-10	2.31753
FBgn0260866	dnr1	90.749	87.603	85.94	212.75	221.41	177.83	1.21291	4.68484	7.5098e-11	3.712e-09	2.31558
FBgn0031091	CG9576	26.621	18.457	23.526	61.545	47.848	49.999	1.21499	2.79851	7.6476e-06	0.00014562	2.32336
FBgn0032140	CG13117	40.685	53.572	48.079	83.956	103.61	145.44	1.21962	3.81746	1.3244e-06	2.9661e-05	2.33958
FBgn0010381	Drs	355.96	295.73	888.65	878.96	798.31	1912.2	1.22083	7.21633	0.0016801	0.015211	2.33031
FBgn0034314	nopo	11.693	9.7341	7.183	20.766	22.276	24.282	1.22292	1.64606	0.0009651	0.0098595	2.35316
FBgn0260474	CG30002	26.998	70.213	50.124	104.87	87.844	152.35	1.2236	3.86663	6.5546e-05	0.00098997	2.34204
FBgn0036993	CG5910	48.131	67.245	44.033	134.31	139.15	99.074	1.22411	3.97848	1.9247e-07	5.4759e-06	2.33697
FBgn0030662	CG9220	450.5	390.32	359.11	866.85	979.32	963.94	1.2276	6.86239	2.6788e-12	1.5513e-10	2.34189
FBgn0036856	CG9666	20.155	17.548	6.1991	53.223	28.928	21.395	1.23103	2.21308	0.00534	0.039031	2.35857
FBgn0004629	Cys	2490.2	1525.2	2823.3	7435	5460.3	3247	1.23899	9.37742	1.6233e-05	0.00028524	2.36043
FBgn0031971	CG7224	182.9	254.07	305.78	539.74	608.02	606.62	1.23908	6.18175	6.0327e-10	2.6241e-08	2.36201
FBgn0250848	26-29-p	1092.5	1190.5	1185.6	2445.6	3002.2	2748.2	1.24045	8.39984	5.8645e-13	3.8264e-11	2.36291
FBgn0030876	CG6762	1173.9	1645.1	1531.4	3063	4209	3011.9	1.24112	8.72675	1.0537e-09	4.5229e-08	2.3639
FBgn0040099	lectin-28C	382.59	497.4	631.08	1439.1	1109.3	1024.8	1.24144	7.20389	8.9567e-09	3.3586e-07	2.36468
FBgn0032449	CG17036	20.136	12.639	9.2454	35.002	35.222	29.181	1.24214	2.15555	0.00017502	0.0023368	2.36564
FBgn0040491	Buffy	10.722	13.64	12.277	32.188	28.249	26.796	1.24322	1.97994	0.0001634	0.0021997	2.38088
FBgn0004242	Syt1	1913.7	1825.1	1895.6	4756.4	4895.4	3690.7	1.24379	9.10136	3.9466e-12	2.2456e-10	2.36804
FBgn0052982	CG32982	180.32	152.81	137.13	345.95	426.52	341.29	1.2449	5.52958	1.4805e-11	7.9181e-10	2.36839
FBgn0031791	CG9486	153.78	191.87	113.64	338.38	429.17	322.82	1.24699	5.4982	3.5312e-09	1.4222e-07	2.37403
FBgn0001145	Gs2	195.51	215.13	225.04	387.39	504.17	623.43	1.25139	5.9672	4.3927e-10	1.9542e-08	2.38326
FBgn0050196	CG30196	42.606	36.013	29.705	68.869	83.092	107.37	1.25383	3.4578	1.0609e-06	2.4726e-05	2.39403
FBgn0038407	CG6126	139.9	135.29	145.25	395.35	348.21	260.45	1.25691	5.3779	1.0059e-10	4.9225e-09	2.388
FBgn0033710	CG17739	53.301	55.535	31.787	63.978	118.44	154.55	1.25811	3.82407	7.306e-05	0.0010933	2.39625
FBgn0063667	CG32335	93.952	90.522	89.009	263	221.23	173.39	1.267	4.77137	5.2372e-10	2.2985e-08	2.40461
FBgn0039113	CG10217	352.45	370.88	369.29	990.9	896.93	749.84	1.27162	6.75852	1.0711e-12	6.6768e-11	2.41408
FBgn0010039	GstD3	66.498	136.42	92.091	224	267.81	221.76	1.27212	4.88477	5.6585e-08	1.8098e-06	2.41881
FBgn0032668	CG17681	21.412	24.338	25.564	66.27	63.615	42.234	1.27224	2.89104	6.0614e-06	0.00011794	2.41354
FBgn0002899	mus301	31.026	37.99	32.745	89.875	71.777	85.773	1.27497	3.38683	4.9049e-08	1.5948e-06	2.43143
FBgn0041194	Prat2	2865.2	3216.2	3046.5	6856	8453.1	6862	1.28032	9.82283	2.3521e-13	1.6443e-11	2.42894
FBgn0028542	nimB4	438.85	358.15	459.28	1047.5	1041	966.49	1.28223	6.96663	3.9226e-13	2.6476e-11	2.43177
FBgn0034897	Sesn	651.29	620.09	490.08	1315.9	1602.9	1373.6	1.28505	7.45514	3.7503e-12	2.1464e-10	2.43684
FBgn0038053	CG18549	415.41	398.11	424.53	1124.2	1115	779.05	1.28603	6.94828	2.0309e-11	1.0802e-09	2.43791
FBgn0039236	CG13639	6.3855	2.8918	7.1454	12.26	16.44	11.716	1.29549	1.00206	0.0062623	0.043998	2.46098
FBgn0031381	Npc2a	1210.9	1021.1	1176.4	2686.8	3057.1	2623.1	1.29572	8.41348	6.6132e-14	4.8664e-12	2.45482
FBgn0015376	cutlet	31.926	22.356	24.565	74.787	64.284	54.819	1.29992	3.04607	8.1808e-07	1.9672e-05	2.45907
FBgn0039593	CG9989	470.28	911.24	793.8	1662.9	1999	1702	1.30177	7.77105	1.615e-08	5.6452e-07	2.4658
FBgn0030507	CG11164	8.6785	17.549	17.369	33.999	38.665	35.986	1.30597	2.25313	3.6641e-05	0.00058309	2.49217
FBgn0038198	Npc2b	41.496	27.213	30.706	74.619	77.046	94.808	1.30622	3.37324	1.3901e-07	4.0857e-06	2.47923
FBgn0032929	Mcm10	18.284	34.147	21.506	78.651	56.441	49.097	1.31129	2.97043	1.3536e-05	0.00024131	2.49116
FBgn0030469	CG15745	109.85	99.304	74.743	188.9	292.09	228.63	1.32173	4.86354	1.8613e-09	7.7517e-08	2.49957
FBgn0038608	WRNexo	4.4064	14.649	11.245	35.138	16.775	25.544	1.33622	1.79598	0.0014682	0.013685	2.5563
FBgn0031011	CG8034	163.56	195.66	222.96	518.13	552.51	401.89	1.33896	5.90237	5.2376e-12	2.963e-10	2.52934
FBgn0033644	Tret1-2	47.989	51.641	30.756	113.47	96.63	121.59	1.34165	3.77863	1.1342e-08	4.1266e-07	2.54391
FBgn0028675	Sur	21.205	16.561	7.2184	39.722	43.037	31.588	1.34357	2.31591	8.7467e-05	0.0012789	2.54193
FBgn0262887	CR43242	3.2661	7.8142	5.1199	11.288	13.692	17.225	1.34551	1.02929	0.0030045	0.024648	2.60521
FBgn0023180	Orc6	4.3552	7.7886	10.205	26.607	18.83	11.961	1.34985	1.41987	0.0026706	0.02244	2.56828
FBgn0259676	DNApol-alpha60	14.896	16.588	6.1878	28.3	31.693	36.931	1.35039	2.08718	0.00011414	0.0016049	2.57285
FBgn0030958	CG6900	12.789	10.697	11.257	31.216	29.114	29.048	1.35631	1.98213	2.7151e-05	0.00044848	2.57255
FBgn0032036	CG13384	225.48	277.45	275.16	600.23	797.09	596.58	1.35745	6.33191	1.8716e-12	1.1238e-10	2.56256
FBgn0038118	timeout	32.086	43.869	27.663	98.396	79.529	89.331	1.36051	3.47127	1.7648e-08	6.1247e-07	2.57924
FBgn0033981	Cyp6a21	50.062	35.977	39.909	141.11	105.4	77.183	1.36304	3.74283	2.7608e-07	7.5561e-06	2.57005
FBgn0030234	CG15211	41.473	31.141	23.58	94.642	79.664	73.326	1.36415	3.36682	1.2012e-07	3.5625e-06	2.5743
FBgn0040349	CG3699	128.11	108.98	130.92	400.15	335.38	217.75	1.37411	5.27083	1.1557e-09	4.939e-08	2.59036
FBgn0033153	Gadd45	24.656	36.065	27.634	70.847	90.355	68.667	1.37646	3.25977	8.3376e-08	2.6154e-06	2.60165
FBgn0051337	CG31337	18.311	31.185	29.646	64.237	62.415	80.874	1.37937	3.11233	1.5581e-07	4.525e-06	2.6222
FBgn0038846	CG5697	119.72	189.01	94.213	256.9	419.79	374.52	1.38206	5.40689	5.5251e-08	1.7729e-06	2.60883
FBgn0002868	MtnA	745.78	1034.7	1533.3	3971.1	2383.2	2291.7	1.38346	8.43589	4.1952e-07	1.0833e-05	2.60911
FBgn0039099	CG10157	407.03	581.24	415.38	1190.2	1338.7	1161.4	1.39413	7.20663	3.8186e-13	2.5953e-11	2.62907
FBgn0026061	Mipp1	79.055	69.059	96.107	277.26	223	146.96	1.4067	4.71006	9.3067e-09	3.4568e-07	2.65014
FBgn0034670	CG13488	9.7446	13.607	23.463	42.55	42.902	39.537	1.40915	2.41561	9.368e-06	0.00017509	2.66987
FBgn0038256	CG7530	112.21	116.79	136.02	391.59	341.39	236.2	1.40944	5.28461	3.2086e-11	1.6704e-09	2.65514
FBgn0031182	Cyp6t1	43.95	70.162	54.229	137.01	138.74	173.62	1.40979	4.18778	2.3065e-10	1.0699e-08	2.6694
FBgn0010497	dmGlut	117.37	117.82	83.952	294.05	284.67	271.58	1.41306	5.09583	1.0079e-13	7.253e-12	2.66433
FBgn0038139	CG8795	16.967	13.64	6.1859	38.845	29.878	30.289	1.42131	2.10134	5.5647e-05	0.00085319	2.69106
FBgn0033439	CG1773	205.48	485.92	361.1	814.79	1011.1	1025.3	1.43713	6.82363	2.4023e-08	8.1636e-07	2.70897
FBgn0038598	CG7131	9.6143	9.7342	9.2116	35.13	23.903	18.89	1.44156	1.78578	0.00022127	0.0028532	2.72839
FBgn0030334	Karl	40.884	77.921	83.817	173.9	173.92	206.2	1.44663	4.47547	1.4597e-09	6.1579e-08	2.73425
FBgn0038466	CG8907	49.892	25.249	26.641	88.832	99.6	89.413	1.44983	3.50496	3.9624e-08	1.3013e-06	2.7298
FBgn0044812	TotC	233.12	425.53	316.12	1210.5	826.38	639.99	1.45702	6.72795	2.0675e-08	7.1499e-07	2.74616
FBgn0041150	hoe1	158.81	89.454	116.64	399.13	328.33	282.34	1.46953	5.32719	4.0533e-11	2.0989e-09	2.7673
FBgn0028514	CG4793	111.51	238.56	253.6	760.47	505.65	406.77	1.4698	6.04941	4.665e-07	1.1859e-05	2.7712
FBgn0038660	CG14291	233.94	255.04	258.8	735.57	763.37	587.44	1.48046	6.36386	6.3007e-16	5.7098e-14	2.7901
FBgn0023129	aay	292.79	234.45	519.47	881.01	1272.4	776.68	1.48478	6.85075	8.5366e-08	2.6693e-06	2.79933
FBgn0003651	svp	634.35	630.76	663.91	1719.6	2199.1	1485.4	1.48635	7.73127	8.3621e-15	6.7082e-13	2.80147
FBgn0039648	CG14515	7.4318	6.8239	3.0943	27.643	9.9718	11.852	1.49232	1.19632	0.0039303	0.030552	2.85111
FBgn0261989	CG42807	184.97	311.65	196.47	808.56	700.71	449.8	1.49859	6.26867	2.7133e-09	1.1019e-07	2.82657
FBgn0053126	NLaz	121.94	160.64	170.79	281.42	452.01	550.2	1.49987	5.66094	4.8231e-10	2.1263e-08	2.83131
FBgn0033799	GLaz	3.2244	3.8932	4.0903	9.4209	7.5312	15.925	1.50222	0.6948	0.0041461	0.032128	2.93339
FBgn0001224	Hsp23	5270.5	13133	6705.8	19033	22744	29363	1.50244	11.443	3.4316e-07	9.1762e-06	2.83321
FBgn0015372	chrw	83.234	74.94	73.67	242.11	235.1	180.27	1.50536	4.70635	2.8695e-14	2.1941e-12	2.83587
FBgn0027556	CG4928	136.7	132.37	143.21	406.55	383.21	388.66	1.51452	5.53548	1.774e-19	2.4803e-17	2.8583
FBgn0000078	Amy-d	6.3165	1.9287	2.0604	8.4714	12.117	9.3356	1.5222	0.60354	0.005193	0.038127	2.90366
FBgn0034397	CG15082	1.1277	6.8582	2.0603	10.404	12.119	7.1375	1.52276	0.59637	0.0069921	0.048294	2.95241
FBgn0051454	CG31454	11.756	11.676	12.275	40.739	32.492	30.346	1.52973	2.13589	2.2039e-06	4.689e-05	2.90075
FBgn0035975	PGRP-LA	17.05	15.575	13.317	40.599	44.577	48.587	1.53239	2.47473	8.7196e-08	2.7178e-06	2.91156
FBgn0029507	Tsp42Ed	286.31	361.2	300.78	896.21	1174.6	672.43	1.53247	6.74375	2.4297e-12	1.4155e-10	2.89283
FBgn0005696	DNApol-alpha73	19.193	15.553	18.41	50.086	54.091	49.945	1.53282	2.6697	1.4647e-08	5.1565e-07	2.89943
FBgn0004431	LysX	54.643	101.39	53.262	166.23	170.27	271.7	1.53545	4.58438	2.443e-08	8.2732e-07	2.90595
FBgn0040503	CG7763	138.04	171.28	255.61	660.09	592.7	390.57	1.54013	6.00598	6.7954e-10	2.9428e-08	2.90896
FBgn0013809	Dhc16F	9.587	6.7938	9.2023	40.929	17.685	16.627	1.54556	1.7149	0.00093262	0.0096181	2.94104
FBgn0261932	CG42798	9.6049	15.648	2.0969	30.301	28.338	22.267	1.54975	1.8075	0.00025995	0.0032534	2.95819
FBgn0030593	CG9512	299	272.52	311.99	1075.2	872.04	642.24	1.55155	6.65597	1.3175e-13	9.4122e-12	2.9309
FBgn0015010	Ag5r	6.3852	6.8283	3.0917	20.887	11.776	16.255	1.55865	1.16396	0.00051039	0.0057882	3.00015
FBgn0035968	Slc45-1	504.14	521.73	606.58	1998.8	1586.2	1374	1.60296	7.57769	1.895e-16	1.8363e-14	3.03777
FBgn0039640	CG14516	16.101	22.411	20.456	56.682	68.832	54.702	1.60687	2.8664	2.0827e-09	8.5288e-08	3.05617
FBgn0032252	CG6232	7.3984	2.8981	4.1004	19.95	18.162	6.2264	1.6128	1.05182	0.0050317	0.037302	3.07972
FBgn0029823	CG3011	3653.4	4764	3765.6	11177	13080	13177	1.6194	10.4873	1.0087e-18	1.2657e-16	3.07264
FBgn0024920	Ts	20.37	29.244	22.518	76.594	65.806	81.036	1.61995	3.15548	9.7611e-11	4.8006e-09	3.0976
FBgn0000406	Cyt-b5-r	890.49	636.51	877.68	2936.6	2534.7	1929.8	1.62201	8.14983	2.2232e-14	1.7269e-12	3.07779
FBgn0013953	Esp	19.223	24.383	13.341	50.01	52.107	74.895	1.62342	2.8318	6.8436e-08	2.1746e-06	3.10836
FBgn0085325	CG34296	64.148	74.974	70.585	169.04	187.47	293.69	1.62797	4.65646	6.6683e-12	3.6664e-10	3.10052
FBgn0034990	CG11406	3.2052	3.902	2.0575	9.4427	8.4914	11.504	1.63237	0.55296	0.0019944	0.017506	3.21212
FBgn0039487	gb	98.211	81.718	102.27	328.17	312.27	233.7	1.63242	5.08046	9.5943e-16	8.3097e-14	3.0976
FBgn0029091	CS-2	512.41	446.8	371.41	1684.9	1392.5	1092.2	1.64792	7.31724	2.6336e-15	2.1659e-13	3.13358
FBgn0030594	CG9509	1452.7	2689.7	1786.2	5705.4	6773.2	6143.7	1.65116	9.47265	2.4853e-13	1.7129e-11	3.1411
FBgn0032322	CG16743	152.87	209.35	178.01	569.13	667.54	471.48	1.66033	6.03165	4.4421e-17	4.625e-15	3.16189
FBgn0053461	CG33461	8.5822	4.818	16.307	40.783	26.35	29.139	1.68686	2.00255	2.3131e-05	0.00038897	3.2407
FBgn0036627	Grp	18.037	9.6984	12.286	52.111	47.288	29.488	1.68709	2.39697	1.2528e-06	2.8298e-05	3.22045
FBgn0052170	CG32170	24.325	14.595	6.201	51.062	56.806	40.908	1.71706	2.58181	1.3727e-06	3.0673e-05	3.29727
FBgn0034199	Gbp	82.55	153.89	140.11	402.71	437.43	401.48	1.71905	5.56006	8.3113e-16	7.3282e-14	3.29736
FBgn0043575	PGRP-SC2	1772.6	1670.4	1325.9	5427.6	5710	4616.3	1.72401	9.21428	4.054e-20	6.1216e-18	3.30347
FBgn0033697	Cyp6t3	57.704	59.372	63.412	219.4	187.59	204.18	1.75683	4.54037	2.5375e-20	4.0055e-18	3.38621
FBgn0027793	CG14787	90.599	61.261	74.683	243.87	298.79	224.23	1.76102	4.86412	3.2122e-17	3.4172e-15	3.38519
FBgn0002577	m	8.5649	12.692	6.1654	34.067	32.61	28.007	1.77357	1.9639	5.2545e-07	1.3145e-05	3.45281
FBgn0030575	CG5321	194.49	272.66	195.43	754.42	764.86	749.44	1.77441	6.41208	1.3776e-20	2.2103e-18	3.42407
FBgn0053329	Sp212	376.7	341.72	204.72	1111.8	986.75	1062.6	1.77546	6.88887	7.1697e-16	6.3791e-14	3.42435
FBgn0043577	PGRP-SB2	39.046	13.574	7.2416	64.241	54.517	87.614	1.78016	3.00978	2.5004e-05	0.00041632	3.44749
FBgn0034709	Swim	97.986	60.284	68.568	229.61	263.23	296.64	1.79867	4.89562	8.71e-17	8.7882e-15	3.48037
FBgn0034898	CG18128	6.3165	1.9287	2.0604	6.5029	21.994	8.357	1.80931	0.79331	0.0039904	0.030971	3.5761
FBgn0027563	CG9631	32.147	54.621	28.699	135.17	129.33	149.46	1.8341	3.97069	3.1248e-14	2.3707e-12	3.58509
FBgn0034804	CG3831	38.562	50.643	49.09	146.44	173.3	176.18	1.83704	4.22609	1.4391e-18	1.7388e-16	3.58596
FBgn0032824	CG13962	2718.1	4253.9	4284.2	13984	14852	11482	1.84066	10.5431	8.3293e-18	9.4789e-16	3.58185
FBgn0037592	CG11737	435.87	577.3	500.25	1970.3	1894.2	1573.4	1.84493	7.65425	1.1859e-22	2.1493e-20	3.59312
FBgn0033440	CG10459	27.739	33.151	17.448	80.246	97.809	105.32	1.84709	3.43676	1.5495e-12	9.4194e-11	3.61734
FBgn0026563	CG1979	5.3285	3.8815	5.1134	18.927	21.628	11.899	1.86168	1.20343	3.8766e-05	0.00060997	3.66212
FBgn0069973	CG40485	13.838	10.693	11.26	54.975	39.276	37.369	1.87229	2.3824	8.4713e-09	3.226e-07	3.67746
FBgn0037513	pyd3	83.53	143.2	106.41	434.94	377.08	411.81	1.87399	5.50473	3.8752e-20	6.0201e-18	3.67362
FBgn0037519	CG3014	10.654	12.687	5.1522	25.39	26.251	54.827	1.88557	2.08532	1.3578e-05	0.00024162	3.73661
FBgn0053301	CG33301	21.296	16.529	17.4	72.831	74.742	58.304	1.89795	2.98792	2.2178e-12	1.3002e-10	3.72797
FBgn0086695	hd	11.803	15.589	14.32	55.815	53.177	47.726	1.90052	2.61187	4.133e-11	2.1178e-09	3.75714
FBgn0053460	CG33460	40.743	52.564	63.372	250.77	200.66	141.07	1.91734	4.46368	4.0794e-14	3.0246e-12	3.78162
FBgn0035644	Pole2	11.713	6.7782	12.259	44.501	46.557	26.012	1.92569	2.22056	2.1672e-07	6.148e-06	3.80713
FBgn0031470	CG18557	57.795	66.18	80.765	314.98	225.99	264.55	1.97316	4.8872	7.4234e-21	1.2109e-18	3.93436
FBgn0000008	a	157.05	241.6	102.43	488.52	810.87	692.45	1.99	6.17953	7.472e-13	4.8111e-11	3.97509
FBgn0033696	Cyp6g2	44.676	28.182	31.733	143.73	158.06	114.11	1.99349	3.94929	1.1255e-16	1.1127e-14	3.97644
FBgn0036551	CG17029	41.742	56.509	45.027	225.16	222.44	126.11	1.99979	4.40207	1.5033e-14	1.1865e-12	4.00417
FBgn0038353	CG5399	83.19	58.335	79.771	230.48	366.73	288.93	2.00159	5.0188	1.2503e-18	1.5296e-16	4.00432
FBgn0011554	etaTry	20.184	11.643	15.349	49.009	65.185	78.458	2.02211	2.8674	5.3321e-11	2.6762e-09	4.08369
FBgn0033321	CG8738	118.44	108.05	94.154	354.34	494.22	462.71	2.031	5.57231	4.6251e-25	1.1316e-22	4.08949
FBgn0031800	CG9497	5.4617	13.66	12.262	38.694	41.056	51.908	2.04503	2.34357	1.4171e-09	6.0041e-08	4.19511
FBgn0043783	CG32444	448.2	247.11	369.28	1795.5	1692.1	1054.2	2.09288	7.34497	1.754e-16	1.7166e-14	4.26624
FBgn0041579	AttC	67.322	41.731	103.18	300.62	402.97	205.01	2.09643	5.0372	6.3866e-12	3.5515e-10	4.28114
FBgn0036620	CG4842	16.214	31.182	32.696	100.11	132.35	112.59	2.09922	3.66411	6.1167e-16	5.5948e-14	4.30817
FBgn0013323	Ptth	2.1387	2.9295	1.034	8.4897	5.8086	13.637	2.10644	0.41016	0.00082053	0.008598	4.57791
FBgn0033520	Prx2540-1	10.766	9.6904	22.435	88.17	62.525	42.381	2.16245	2.85138	4.6647e-09	1.8335e-07	4.50151
FBgn0035791	CG8539	33.096	33.1	30.701	179.82	137.05	119.91	2.16998	3.98407	1.895e-19	2.6121e-17	4.50767
FBgn0062412	Ctr1B	429.17	338.69	393.84	2085.7	2175.1	994.2	2.17728	7.5394	3.3284e-16	3.1024e-14	4.52354
FBgn0041337	Cyp309a2	14.993	26.377	8.2443	99.492	67.533	59.586	2.18066	3.06562	3.1174e-10	1.4324e-08	4.56745
FBgn0033518	Prx2540-2	38.428	27.189	45.983	208.17	207.12	97.273	2.19738	4.20728	1.0458e-12	6.561e-11	4.59286
FBgn0020506	Amyrel	46.784	3.743	56.133	158.8	170.71	162.45	2.19954	4.14558	6.3102e-06	0.00012157	4.61241
FBgn0031127	CG1835	2.1485	2.9248	2.0513	12.304	7.5003	14.88	2.20773	0.63891	8.669e-05	0.001272	4.86825
FBgn0033635	CG7777	64.305	88.583	109.38	406.46	425.24	467.29	2.30498	5.50878	1.2084e-29	4.0781e-27	4.95291
FBgn0085265	CG34236	6.4235	7.7965	6.146	31.141	32.48	41.498	2.3393	1.99599	1.9157e-10	8.971e-09	5.16149
FBgn0051344	CG31344	65.231	84.742	67.539	370.58	402.3	358.61	2.37609	5.3003	8.533e-37	4.6396e-34	5.20197
FBgn0038865	CG10824	94.787	54.427	70.598	426.48	386.72	337.92	2.3898	5.32376	4.9101e-29	1.5502e-26	5.23684
FBgn0031471	CG3117	185.85	191.76	197.43	1218.8	1016.9	816.1	2.40758	6.71843	5.6842e-33	2.6491e-30	5.30711
FBgn0003046	Pcp	2885.4	3021.5	2482.8	19287	14938	10949	2.4288	10.5978	1.3919e-27	4.128e-25	5.38446
FBgn0016920	nompC	6.3032	1.9321	1.0417	16.045	16.23	19.605	2.44417	1.08783	5.7878e-07	1.4341e-05	5.59233
FBgn0051326	CG31326	80.314	130.53	105.37	581.41	478.86	688.55	2.4639	5.90897	2.4624e-29	8.033e-27	5.5305
FBgn0032693	Cyp310a1	144.3	144.01	208.59	1148	866.73	733.74	2.46696	6.55871	3.6033e-27	1.0372e-24	5.53123
FBgn0037433	CG17919	136.57	109.96	117.66	744.1	700.56	624.4	2.5064	6.14518	6.3832e-41	4.8056e-38	5.68127
FBgn0052407	CG32407	8.6952	26.391	11.287	67.883	96.123	110.91	2.55175	3.27158	6.7213e-14	4.9091e-12	5.92834
FBgn0052271	CG32271	12.798	6.7645	16.33	89.033	62.349	64.027	2.57795	2.93517	4.8355e-16	4.4646e-14	6.0015
FBgn0012042	AttA	83.405	86.603	112.47	571.97	726.15	396.4	2.58391	5.84812	8.981e-27	2.4416e-24	5.99877
FBgn0027584	CG4757	67.07	33.97	57.267	261.7	151.47	565.07	2.62614	5.05238	5.6075e-11	2.8e-09	6.17939
FBgn0014380	RhoL	45.045	85.799	49.153	344.03	410.03	395.5	2.66955	5.27928	1.0107e-31	4.1215e-29	6.38655
FBgn0003996	w	650.37	581.07	748.77	5085.5	4200.6	3412.3	2.68085	8.73122	2.1591e-38	1.4087e-35	6.41265
FBgn0038784	CG4362	138.47	50.45	116.57	763.03	772.83	559.72	2.77734	6.12659	6.8832e-22	1.203e-19	6.85973
FBgn0040319	Gclc	177.14	143.05	151.42	1131.7	1023.6	1122.9	2.79681	6.76612	1.7032e-50	1.8734e-47	6.95108
FBgn0034870	CG13559	3.195	0.95376	4.0789	28.519	16.098	15.323	2.82146	1.22656	8.8476e-08	2.7489e-06	7.28518
FBgn0262187	mir-970	2.1666	3.902	3.0708	30.393	15.107	22.073	2.82921	1.36709	1.1778e-08	4.2693e-07	7.39359
FBgn0041581	AttB	52.44	49.585	80.726	466.12	602.86	263.24	2.86376	5.4679	3.566e-22	6.3456e-20	7.28981
FBgn0030412	tomosyn	588.43	634.7	555.51	4658	4499.1	4009.4	2.88777	8.75713	1.5214e-57	3.7224e-54	7.40257
FBgn0034434	Rgk1	5.512	22.481	12.288	67.817	129.11	114.63	2.93349	3.39989	1.0552e-15	9.0591e-14	7.73459
FBgn0029659	CG16782	2.1171	0.96672	1.0282	9.4071	6.5982	19.234	2.98626	0.5641	1.9663e-05	0.00033941	8.56983
FBgn0001967	nimC3	48.053	56.511	37.9	362.99	494.67	277.97	2.99207	5.22458	2.9341e-32	1.3053e-29	7.97135
FBgn0031412	CG16995	13.856	17.572	6.1878	141.15	94.995	74.843	3.03413	3.38991	2.4574e-18	2.8977e-16	8.26748
FBgn0037727	CG8358	15.027	28.324	11.304	143.61	160.35	173.79	3.11259	3.97956	8.354e-32	3.5548e-29	8.74119
FBgn0037788	CG3940	27.854	36.039	33.753	289.26	336.42	271.71	3.19468	4.86693	1.4282e-49	1.3978e-46	9.19024
FBgn0263076	Klp54D	4.3167	9.7819	3.0942	62.4	60.847	61.499	3.38805	2.63677	1.3528e-23	2.6479e-21	10.7455
FBgn0034329	IM1	9.779	7.7067	35.65	31.61	20.03	512.21	3.41279	4.17377	0.00030136	0.0036776	10.6115
FBgn0038838	TotB	21.626	47.753	48.031	487.96	297.66	497.21	3.44269	5.35253	6.4296e-34	3.1463e-31	10.9261
FBgn0050088	CG30088	3.3487	13.668	12.255	107.75	102.75	120.45	3.47013	3.43208	2.2292e-31	8.7269e-29	11.3061
FBgn0262150	CG42876	5.3659	9.7769	3.0967	59.451	78.213	74.158	3.50411	2.81443	3.6572e-24	7.781e-22	11.6134
FBgn0034552	CG17999	6.3747	7.8189	1.0545	102.5	61.613	32.192	3.65065	2.70782	4.3992e-13	2.9289e-11	12.8741
FBgn0028396	TotA	7489.4	9371	12061	189470	103170	101110	3.76706	13.5776	7.7427e-40	5.4127e-37	13.6145
FBgn0034942	CG13566	2.1579	1.9357	4.0789	44.495	33.204	41.699	3.8079	2.02102	5.719e-19	7.4629e-17	14.6097
FBgn0034467	CG15128	4.3084	7.8142	4.1063	77.516	82.414	73.216	3.80965	2.92626	3.7887e-31	1.4261e-28	14.3661
FBgn0014865	Mtk	68.882	89.378	344.33	2721.9	2763	2000.5	3.89529	7.85468	2.3951e-16	2.2758e-14	14.8937
FBgn0085757	CR40621	4.2814	5.8559	3.0834	180.78	29.936	6.9755	3.99811	2.83077	3.7085e-06	7.5772e-05	16.466
FBgn0038095	Cyp304a1	40.306	19.41	21.52	530.56	415.69	386.67	4.03518	5.36857	5.7966e-57	1.1346e-53	16.408
FBgn0050052	Obp49a	52.683	156.02	64.536	1802	1392.1	1755	4.17682	7.24236	1.6025e-35	8.2544e-33	18.1127
FBgn0033249	CG11191	4.3085	6.8283	5.12	113.49	118.53	89.697	4.27452	3.34758	2.3709e-38	1.4502e-35	19.7897
FBgn0036831	CG6839	5.2846	3.8975	1.044	108.15	48.327	56.09	4.3305	2.77221	7.2055e-20	1.0646e-17	20.7867
FBgn0010388	Dro	6.6514	25.355	27.563	207.56	745.6	288.51	4.37073	5.2513	5.2848e-19	6.9895e-17	20.8441
FBgn0053462	CG33462	27.891	28.181	49.017	954.02	694.04	928.98	4.61088	6.2846	3.046e-73	9.9371e-70	24.5225
FBgn0040333	brv3	1.1139	2.9204	4.0789	67.061	100.15	51.609	4.68695	2.80338	2.1201e-25	5.3204e-23	26.9709
FBgn0050181	CG30181	4.2617	2.9085	4.0903	115.31	124.43	114.92	4.93713	3.45662	1.7227e-50	1.8734e-47	31.4959
FBgn0041233	Gr59e	1.0723	0.97054	1.0249	52.022	53.267	43.151	5.44178	2.25487	6.2262e-29	1.9042e-26	48.3874
FBgn0000241	bw	82.959	59.38	33.862	3632.2	3877.5	3581.2	5.97406	8.35007	2.2257e-104	2.1783e-100	62.9446
FBgn0030880	CG6788	1.0987	1.9434	3.0596	276.4	137.35	191.55	6.54375	4.17546	7.4605e-52	1.2169e-48	99.2019
