# Supplementary material for: Seven-Up Is a Novel Regulator of Insulin Signaling
Source: Oxford University Press journal article supplement (doi:10.1534/genetics.118.300770), 2018-02-28
Supplement: tables2.xlsx [file tables2.xlsx]

## Sheet: control-fed Svpi vs wild-type
ensembl_gene_id	external_gene_id	r4gal4_v60100_0_15m_1	r4gal4_v60100_0_15m_2	r4gal4_v60100_0_15m_3	r4gal4_svpi_0_15m_3	r4gal4_svpi_0_15m_2	r4gal4_svpi_0_15m_1	logFC	logCPM	PValue	FDR	FC Svpi/+
FBgn0035040	CG4741	51.775	72.449	80.741	2.4744	2.5165	1.9716	-4.79077	2.64822	2.0612e-27	7.9056e-25	-29.4384
FBgn0034276	CG6385	944.84	1251.7	1330.9	85.425	42.494	26.605	-4.50708	6.75786	3.365e-42	3.3556e-39	-22.8278
FBgn0039611	CG14528	616.07	630.27	521.98	43.573	28.439	17.736	-4.28649	5.77228	3.3679e-62	1.6792e-58	-19.7032
FBgn0085320	CG34291	1662.5	1851	2060.1	186.91	81.833	34.476	-4.20089	7.4333	4.0761e-22	9.914e-20	-18.3814
FBgn0053128	CG33128	36.927	33.345	1927.7	59.603	37.762	12.777	-4.19716	5.94183	0.00023433	0.0047208	-18.14
FBgn0051015	PH4alphaPV	1.0609	184.87	7.2263	4.9877	2.3722	5.9319	-3.82401	2.63899	0.00095449	0.015837	-14.5321
FBgn0030187	Ipod	15.051	11.258	14.727	0.80581	0.82129	0.98688	-3.78426	0.61905	1.7422e-08	8.5163e-07	-15.6987
FBgn0002562	Lsp1alpha	188770	180760	218820	21067	10898	11291	-3.76568	14.1825	1.0279e-41	9.3185e-39	-13.6016
FBgn0085816	CR41606	33.691	36.579	13.44	3.4109	1.6346	0.98109	-3.70238	1.52813	4.4408e-10	2.8206e-08	-13.8901
FBgn0030270	CG15199	20.154	25.63	27.803	1.6269	1.6568	1.9749	-3.70229	1.32457	5.9751e-13	5.1365e-11	-13.9936
FBgn0051414	CG31414	226.79	250.89	207.02	26.95	15.814	10.834	-3.65594	4.44234	9.1893e-43	1.1455e-39	-12.7747
FBgn0052667	CG32667	313.91	313.78	493.64	26.242	54.786	8.8308	-3.63656	5.15084	1.9664e-19	3.6998e-17	-12.4788
FBgn0052647	CG32647	103.43	91.495	78.012	11.847	3.9504	7.8978	-3.50991	3.14355	1.4765e-25	4.7496e-23	-11.5187
FBgn0040606	CG6503	28.493	20.133	14.274	1.6269	1.6568	1.9749	-3.50096	1.17606	2.5551e-09	1.4336e-07	-11.9614
FBgn0037396	CG11459	440.03	630.15	594.91	89.565	24.379	49.356	-3.348	5.74807	1.0689e-23	2.8807e-21	-10.1965
FBgn0035806	PGRP-SD	244.38	274.36	249.65	32.487	23.335	23.686	-3.26258	4.64179	2.4204e-46	4.0226e-43	-9.66431
FBgn0038105	yellow-f2	33.619	18.182	40.429	4.1965	1.556	3.9526	-3.20192	1.66502	5.4624e-10	3.3833e-08	-9.50325
FBgn0040104	lectin-24A	205.42	114.1	108.34	20.975	11.524	13.815	-3.19791	3.81671	1.2257e-20	2.6006e-18	-9.23824
FBgn0040393	CG14265	10.985	37.707	42.96	2.3996	0.68093	6.9338	-3.17956	1.63715	1.0459e-06	3.8064e-05	-9.15209
FBgn0031821	CG9542	164.7	256.27	209.41	24.852	21.732	22.707	-3.17569	4.36409	1.0834e-32	6.752e-30	-9.09757
FBgn0039152	Rootletin	345.95	335.87	347.39	62.883	23.788	32.563	-3.10341	5.07899	4.2617e-31	2.2367e-28	-8.63185
FBgn0027578	CG14526	1210.7	1302	1337.5	184.67	98.291	171.82	-3.08131	6.98517	8.8904e-38	6.8196e-35	-8.46605
FBgn0038074	CG6188	2349	2528.3	3389.5	413.58	370.19	205.31	-3.06196	8.08937	9.6312e-30	4.8021e-27	-8.35807
FBgn0034292	CG5767	30.032	15.358	319.8	15.711	17.748	11.834	-3.03907	3.56893	0.00017082	0.0035414	-8.06284
FBgn0039022	CG4725	216.94	228.81	276.69	43.619	31.095	12.789	-3.03001	4.5738	6.2112e-26	2.0646e-23	-8.25617
FBgn0030926	psh	112.84	126.05	130.34	13.903	21.251	12.822	-2.92621	3.6242	7.7093e-27	2.7456e-24	-7.69614
FBgn0040733	CG15068	69.166	72.136	17.336	3.9221	1.3826	15.849	-2.88434	2.46964	6.2567e-06	0.00018624	-7.4993
FBgn0030588	CG9521	38.642	4.8775	16.87	4.2578	1.5934	1.9701	-2.87107	1.19343	8.2081e-05	0.001886	-7.72116
FBgn0010295	ng3	26.838	72.12	63.046	9.2127	5.7592	6.9085	-2.8639	2.45857	2.0596e-10	1.3692e-08	-7.40407
FBgn0260780	wisp	480.56	359.35	289.6	34.128	58.919	63.218	-2.85562	5.24595	1.0045e-26	3.4541e-24	-7.22817
FBgn0023535	arg	138.21	180.74	219.8	19.552	39.267	15.767	-2.83974	4.17276	1.5565e-20	3.2337e-18	-7.22321
FBgn0039609	CG14529	7.6702	22.042	16.201	4.3259	0.74391	0.98109	-2.83176	0.81622	1.9263e-05	0.00050417	-7.58783
FBgn0031313	CG5080	493.63	398.4	363.21	81.505	49.135	56.266	-2.74529	5.40989	4.9751e-32	2.7562e-29	-6.71589
FBgn0264541	CR43920	16.73	15.693	20.401	5.1704	0.71157	1.9701	-2.67957	1.01401	2.157e-07	8.8883e-06	-6.7274
FBgn0034291	CG5770	17.739	8.5755	219.46	11.423	13.402	15.807	-2.63303	3.05539	0.0018519	0.027397	-6.04879
FBgn0036950	CG6996	3.1347	8.0826	40.43	3.3222	3.3765	1.9687	-2.58081	0.95859	0.0015675	0.023683	-5.9588
FBgn0040507	ACXD	129.77	112.84	134.73	29.336	15.664	18.75	-2.55379	3.7073	1.2993e-21	2.8793e-19	-5.91906
FBgn0034540	Lrt	199.41	210.82	200.58	38.974	37.847	27.624	-2.53795	4.40001	1.5022e-29	7.1331e-27	-5.84815
FBgn0035311	CR15821	18.34	24.542	30.391	6.8261	3.2865	1.9636	-2.53642	1.43712	4.9637e-08	2.2499e-06	-6.06755
FBgn0043578	PGRP-SB1	36.862	38.104	62.211	13.646	3.9516	5.9138	-2.51845	2.27873	1.7093e-09	9.8528e-08	-5.83449
FBgn0000592	Est-6	32.046	20.207	18.514	6.8261	3.2865	1.9636	-2.508	1.42931	1.9994e-07	8.2731e-06	-5.86004
FBgn0003372	Sgs1	852.21	787.31	288.49	94.548	176.33	83.883	-2.44113	6.07417	6.1828e-11	4.3116e-09	-5.43467
FBgn0036353	CG10171	805.99	626.1	674.4	124.55	106.97	168.88	-2.39698	6.20678	5.9648e-27	2.203e-24	-5.26096
FBgn0030817	CG4991	417.01	364.66	199.92	44.856	62.817	90.889	-2.30668	5.12548	2.9872e-14	2.9788e-12	-4.94349
FBgn0053225	CG33225	288.05	203.28	217.34	46.181	47.8	49.371	-2.30644	4.65471	1.157e-24	3.2964e-22	-4.94357
FBgn0027657	glob1	429.85	352.8	453.67	69.032	93.317	87.882	-2.30323	5.45292	2.5854e-28	1.121e-25	-4.94071
FBgn0031178	CG10918	31.287	72.199	67.409	14.191	9.0624	11.848	-2.26778	2.62578	1.1992e-08	5.9493e-07	-4.86861
FBgn0031558	CG16704	4589.9	4742.9	4930.6	1254.4	611.46	1144.4	-2.24433	8.99019	1.2443e-18	2.1031e-16	-4.73826
FBgn0033809	CG4630	142.59	216.24	211.62	54.222	24.638	42.461	-2.22838	4.35085	1.9899e-15	2.42e-13	-4.70199
FBgn0052448	CG32448	99.594	107.14	121.15	24.848	19.094	25.68	-2.22726	3.56022	6.4054e-18	9.3934e-16	-4.70949
FBgn0024740	Lip2	22.105	19.031	20.811	7.7004	1.4916	3.946	-2.20515	1.29454	1.2792e-06	4.5417e-05	-4.7151
FBgn0028519	CG4500	2298	3029.8	1795.3	580.03	401.25	594.42	-2.17663	8.00094	2.1128e-19	3.9016e-17	-4.52059
FBgn0028482	CG16857	66.52	43.688	43.764	14.198	14.42	5.9001	-2.13957	2.5254	4.8833e-09	2.5765e-07	-4.46062
FBgn0016122	Acer	150.07	132.9	152.66	34.744	30.939	33.571	-2.12883	3.98624	1.8889e-20	3.7673e-18	-4.38904
FBgn0030105	CG15369	3257.2	3362.9	4384.5	1026.3	473.81	1027.9	-2.12194	8.63799	3.1224e-14	3.0828e-12	-4.35307
FBgn0035204	CG2277	486.95	650.16	514.22	123.81	138.57	119.46	-2.11068	5.90477	4.5488e-25	1.3341e-22	-4.32466
FBgn0036157	CG7560	17.786	10.2	14.818	1.5179	5.1755	2.9596	-2.1103	0.86174	8.8475e-05	0.0020097	-4.43427
FBgn0050360	Mal-A6	961.66	1272.8	1223	298.41	236.27	268.56	-2.10464	6.97099	2.5795e-25	8.0382e-23	-4.30439
FBgn0052198	CG32198	77.761	92.246	43.418	25.282	15.875	8.8564	-2.08263	2.99287	5.2998e-08	2.3914e-06	-4.26736
FBgn0038420	CG10311	323.98	341.22	249.18	76.062	71.256	70.097	-2.0727	5.06326	5.2008e-23	1.3298e-20	-4.20569
FBgn0014396	tim	21.945	16.987	38.387	3.965	9.4574	4.9297	-2.04555	1.59156	2.876e-05	0.00074107	-4.21309
FBgn0085428	Nox	211.86	169.85	230.81	37.59	59.874	51.346	-2.03799	4.49149	3.5132e-18	5.3082e-16	-4.11612
FBgn0004047	Yp3	99.23	103.1	256.78	60.399	42.076	10.799	-2.02654	4.07354	2.0573e-05	0.00053704	-4.05309
FBgn0026760	Tehao	11.236	20.01	23.013	9.5222	1.4923	1.9624	-2.0246	1.14267	0.0002445	0.0048763	-4.1812
FBgn0032304	CG17134	16.417	33.338	37.539	13.714	5.7626	1.9526	-2.00263	1.75914	0.00011368	0.0025194	-4.0736
FBgn0041712	yellow-d	152.39	160.88	250.22	63.345	37.432	40.465	-1.98828	4.37744	4.8229e-13	4.1821e-11	-3.98954
FBgn0001125	Got2	2838.8	3803.2	3515.7	853.96	775.67	938.01	-1.98389	8.54939	2.8555e-23	7.4933e-21	-3.95605
FBgn0039031	CG17244	1427.9	1451.5	1318.9	385.07	240.88	436.46	-1.98286	7.27564	2.9896e-18	4.6582e-16	-3.95168
FBgn0028543	nimB2	2066.7	2267.2	2693.8	637.75	486.92	667.48	-1.97102	8.0205	9.5588e-22	2.2168e-19	-3.92138
FBgn0262858	CG43222	29.193	28.95	21.444	11.065	2.2515	6.9114	-1.96512	1.6708	6.3556e-06	0.00018807	-3.93452
FBgn0034440	CG10073	20.505	12.388	12.345	2.3576	4.2102	4.9422	-1.96279	0.96743	0.00014957	0.0031803	-3.93032
FBgn0050411	CG30411	21.854	30.091	34.91	10.108	3.9802	7.9008	-1.95538	1.76683	2.162e-06	7.1864e-05	-3.94993
FBgn0034860	CG9812	616.23	426.55	581.54	146.28	147.74	124.39	-1.95492	5.91198	1.8251e-20	3.7142e-18	-3.88213
FBgn0033133	Tsp42Ek	1897.5	1824.2	1736.1	594.49	274.23	544.07	-1.94976	7.6606	4.3426e-14	4.2456e-12	-3.86314
FBgn0035312	CG15820	181.9	170.7	154.97	48.027	39.247	45.421	-1.93562	4.24653	3.1162e-18	4.7807e-16	-3.82509
FBgn0083042	snoRNA:Psi18S-1854a	121.94	244.36	374.97	83.953	47.358	64.176	-1.92159	4.78411	2.5507e-08	1.1942e-06	-3.79191
FBgn0039613	CG14527	28.933	28.095	51.69	9.0271	9.1831	10.866	-1.88162	2.08018	1.991e-06	6.7763e-05	-3.73907
FBgn0031561	CG16712	1141.5	1676.8	1862	458.55	436.23	382.09	-1.87271	7.45432	1.6809e-17	2.2349e-15	-3.66545
FBgn0011722	Tig	4369.2	4527.6	5350.2	1371.1	1148	1388.2	-1.86619	9.06199	7.3138e-22	1.7365e-19	-3.64625
FBgn0023541	Cyp4d14	133.77	75.068	85.391	26.389	27.702	26.657	-1.86526	3.48942	2.2438e-10	1.4818e-08	-3.64379
FBgn0041707	7B2	963.8	1173.2	602.16	265.23	267.71	221.15	-1.86086	6.68623	2.889e-14	2.91e-12	-3.6324
FBgn0052117	CG32117	24.862	17.946	18.167	4.0048	8.6027	3.9404	-1.85923	1.34969	3.627e-05	0.00090876	-3.68476
FBgn0036262	CG6910	4215.9	3761.2	4051.9	985.8	1088.7	1281.6	-1.84178	8.82334	1.2595e-21	2.8546e-19	-3.58422
FBgn0038730	CG6300	8.7796	13.234	6.4641	4.2582	2.4932	0.97866	-1.81932	0.45294	0.0027002	0.037242	-3.68402
FBgn0003867	tsl	245.41	245.38	208.58	81.365	59.372	57.249	-1.81828	4.73048	6.7216e-18	9.7141e-16	-3.53242
FBgn0263046	CG43341	88.463	61.601	77.161	19.704	21.8	23.703	-1.79929	3.13536	2.2924e-10	1.5039e-08	-3.48467
FBgn0005670	Cyp4d1	1726.7	2787.7	2273.2	804.98	581.84	598.32	-1.77313	8.01295	6.0767e-15	6.7329e-13	-3.4192
FBgn0030425	CG3775	260.25	271.14	290.64	74.157	95.101	73.051	-1.7575	4.97409	8.9547e-19	1.5396e-16	-3.39249
FBgn0039800	Npc2g	1041.1	1288.5	1248.4	345.95	288.1	443.37	-1.7317	7.09935	1.7436e-16	2.2009e-14	-3.3209
FBgn0053203	CG33203	6.8626	15.465	13.154	5.0742	4.2367	0.97539	-1.71542	0.69642	0.0028978	0.039138	-3.44941
FBgn0037723	SpdS	209.88	203.26	286.53	95.656	58.406	58.23	-1.71378	4.7509	1.515e-12	1.2508e-10	-3.29579
FBgn0039798	CG11313	1253.8	1998.7	1235.1	449.22	398.96	531.23	-1.70203	7.43318	2.1478e-13	1.9296e-11	-3.25327
FBgn0032287	CG6415	1145.3	1426.9	1423.4	385.53	330.05	514.46	-1.69975	7.26592	2.1464e-15	2.5788e-13	-3.24835
FBgn0035026	Fcp1	317.75	336.81	271.07	93.261	93.044	100.72	-1.69084	5.16336	6.0903e-18	9.0645e-16	-3.22491
FBgn0039464	CG6330	154.5	127.4	162.76	51.384	46.992	39.477	-1.68198	4.11106	1.3321e-13	1.2651e-11	-3.22561
FBgn0032773	fon	12799	14762	19223	5152.1	4160.1	5403.9	-1.66855	10.8222	4.3583e-15	5.0536e-13	-3.1791
FBgn0053516	dpr3	15.995	11.242	12.094	7.7358	3.287	0.97341	-1.66749	0.85087	0.0013154	0.020656	-3.27862
FBgn0030251	CG2145	1314.9	1264.2	1532.9	451.03	390.65	456.17	-1.66313	7.31592	1.5581e-18	2.5896e-16	-3.16832
FBgn0038858	CG5793	235.39	250.07	342.83	78.231	106.07	78.974	-1.64741	5.00946	2.1699e-13	1.932e-11	-3.1461
FBgn0033742	CG8550	266.47	215.67	339.87	90.907	79.503	92.82	-1.63905	5.00177	1.3524e-13	1.2723e-11	-3.12278
FBgn0038508	CG5866	19.358	12.534	31.187	7.477	9.4071	2.9445	-1.63639	1.42049	0.00089406	0.015035	-3.18121
FBgn0260753	Pdfr	13.205	11.261	17.297	3.2013	5.0691	4.9388	-1.62293	0.91642	0.00118	0.018887	-3.16166
FBgn0263462	snoRNA:Dek-a	26.33	23.639	44.448	16.998	7.3713	5.9049	-1.62013	1.95354	0.0001639	0.0034265	-3.11873
FBgn0033729	Cpr49Af	11.367	15.559	14.741	4.0904	1.4901	7.9188	-1.61454	0.91985	0.0018705	0.027592	-3.0866
FBgn0028534	CG7916	421.76	409.31	2866.5	398.85	343.56	473.97	-1.60646	7.1753	0.0038889	0.047767	-3.03981
FBgn0033446	CG1648	286.75	293.47	314.44	108.4	93.003	91.815	-1.60541	5.13272	4.0089e-17	5.26e-15	-3.05118
FBgn0032264	Lip4	439.58	449.51	358.79	154.69	90.765	169.86	-1.58874	5.61797	1.1752e-11	8.681e-10	-3.00466
FBgn0039801	Npc2h	36.971	39.09	45.542	7.0686	11.636	21.761	-1.58801	2.31413	1.9182e-05	0.00050337	-3.0051
FBgn0032219	CG4995	62.857	43.719	53.493	18.177	20.249	14.798	-1.58052	2.69902	3.3611e-07	1.3248e-05	-3.00746
FBgn0030519	CG11151	1734.7	2350.6	2228.2	768.3	585.09	760.28	-1.57837	7.95516	1.1864e-14	1.2585e-12	-2.98698
FBgn0086671	snoRNA:Psi28S-2876	31.878	56.311	211.08	38.172	18.751	44.464	-1.57784	3.56195	0.0038199	0.047401	-2.95175
FBgn0002563	Lsp1beta	324830	317560	324820	120710	62275	141490	-1.57576	15.2147	1.9989e-09	1.1456e-07	-2.98085
FBgn0038181	CG9297	294.62	395.7	274.2	128.37	91.097	109.6	-1.55108	5.25644	1.5178e-12	1.2508e-10	-2.93107
FBgn0030769	CG13012	61.903	48.132	56.392	13.75	23.719	19.749	-1.53712	2.76401	4.3001e-07	1.6455e-05	-2.90865
FBgn0039471	CG6295	143.58	42.172	342.31	76.425	62.939	44.397	-1.53247	4.39208	0.0024472	0.034227	-2.87363
FBgn0039678	Obp99a	432.86	751.55	614.55	266.61	187.67	169.8	-1.5255	6.15823	5.3751e-10	3.35e-08	-2.88258
FBgn0039911	CG1909	77.114	41.631	62.265	26.729	18.313	17.76	-1.52085	2.88615	4.0003e-06	0.00012388	-2.88223
FBgn0004169	up	2491.1	3230.9	2997.5	1006.7	917.42	1121.7	-1.51729	8.4365	5.5652e-15	6.2355e-13	-2.86278
FBgn0039017	CG6985	17.671	19.977	12.515	4.8695	6.7613	5.9235	-1.50644	1.1893	0.0010123	0.016685	-2.85759
FBgn0030966	CG7280	1611.4	1934.4	1469.3	598.8	540.83	626	-1.5063	7.64203	4.7245e-15	5.4153e-13	-2.8404
FBgn0030326	CG2444	17220	16196	14865	5746.6	4806	6548.2	-1.49741	10.9105	1.1319e-14	1.2137e-12	-2.82332
FBgn0083046	snoRNA:Psi18S-1389a	21.787	25.823	48.448	17.781	9.9725	5.901	-1.49663	2.00523	0.00080872	0.013809	-2.85424
FBgn0045980	niki	134.75	219.29	140.49	74.824	28.599	73.096	-1.48593	4.31566	3.6052e-06	0.0001145	-2.80157
FBgn0039612	CG14523	99.545	145.75	94.501	53.356	32.426	35.531	-1.4824	3.78191	8.3226e-08	3.6401e-06	-2.80099
FBgn0033600	Cpr47Ec	12.304	15.54	12.107	2.2996	5.9515	5.93	-1.47977	0.90921	0.0037857	0.047189	-2.8172
FBgn0083003	snoRNA:Psi28S-1175c	185.41	341.66	688.14	191.49	106.83	140.2	-1.4719	5.60527	7.7009e-05	0.0017901	-2.77116
FBgn0010423	TpnC47D	63.332	96.707	65.99	19.465	27.692	34.583	-1.46802	3.21001	1.0944e-06	3.9541e-05	-2.76522
FBgn0002939	ninaD	39.985	16.003	36.501	6.3045	15.353	11.851	-1.45643	1.98337	0.0010422	0.017066	-2.76017
FBgn0031692	TpnC25D	27.424	20.24	27.904	5.5398	9.2198	12.854	-1.44895	1.71685	0.00027663	0.0054302	-2.73662
FBgn0032136	CG15828	497.57	585.65	569.94	188.97	203.84	213.28	-1.44665	6.05809	1.0161e-14	1.1014e-12	-2.72758
FBgn0030013	GIIIspla2	221.53	177.68	254.31	88.572	55.672	95.802	-1.44383	4.72462	1.0964e-09	6.4312e-08	-2.72248
FBgn0002440	l(3)mbn	21.913	21.358	37.245	2.9108	12.768	13.843	-1.44271	1.78965	0.0018884	0.027775	-2.72734
FBgn0026593	CG5707	63.713	54.693	46.758	21.517	21.867	17.762	-1.43216	2.78599	1.1152e-06	4.0003e-05	-2.70114
FBgn0000044	Act57B	5957.5	8589.7	9009.9	1887.1	3034.9	3834	-1.42779	9.8938	4.4724e-08	2.0365e-06	-2.6904
FBgn0264695	Mhc	3882.7	5308.4	5645.5	2046.9	1475	1995.5	-1.42694	9.22707	2.9921e-11	2.1466e-09	-2.68906
FBgn0050035	Tret1-1	1953.8	2284.7	1781.1	730.02	605.17	906.44	-1.42549	7.92685	8.211e-12	6.203e-10	-2.68537
FBgn0023001	melt	211.78	204.26	226.83	78.403	83.955	77.997	-1.41565	4.70863	1.1438e-13	1.0967e-11	-2.67467
FBgn0003060	CG9757	13.075	16.765	22.946	5.7136	5.8158	7.9056	-1.41	1.25007	0.0016083	0.024153	-2.71603
FBgn0003965	v	194.97	224.09	186.12	81.901	65.167	80.972	-1.40866	4.62615	2.9182e-12	2.3468e-10	-2.65383
FBgn0034162	CG6426	45.087	38.03	41.617	15.673	18.6	12.823	-1.39451	2.4041	7.982e-06	0.00023072	-2.64851
FBgn0039048	CG17111	55.083	44.55	21.063	19.226	8.8936	17.782	-1.39425	2.37635	0.00091504	0.01531	-2.62945
FBgn0029799	CG15772	269.91	361.12	248.98	108.11	94.477	133.32	-1.39129	5.16838	2.7325e-10	1.758e-08	-2.6198
FBgn0050163	Cpr60D	30.271	91.076	86.296	17.773	25.976	35.577	-1.38605	3.10264	0.00057126	0.010283	-2.61759
FBgn0085488	CG34459	14.15	15.536	9.4922	4.9383	5.023	4.9355	-1.38532	0.9209	0.0036528	0.046343	-2.62997
FBgn0083015	snoRNA:Psi18S-920	73.648	92.868	180.6	61.769	31.456	39.481	-1.38503	3.83008	8.013e-05	0.0018497	-2.61568
FBgn0034914	CG5554	2204.5	2549.1	1857.1	964.18	752.15	816.54	-1.38409	8.07322	4.4828e-12	3.4924e-10	-2.60996
FBgn0029990	CG2233	22535	21264	20128	9480.9	5589.9	9534	-1.37751	11.3478	9.9615e-10	5.9841e-08	-2.59815
FBgn0039564	CG5527	44.23	31.451	44.154	12.195	13.299	20.758	-1.37294	2.35584	4.8729e-05	0.0011709	-2.59091
FBgn0037230	CG9780	45.148	36.893	36.023	11.323	15.072	19.766	-1.36095	2.34516	3.1302e-05	0.00080037	-2.55766
FBgn0064237	Idgf5	496.76	543.3	537.37	217.34	178.38	218.22	-1.36077	6.01454	3.9961e-13	3.4955e-11	-2.56936
FBgn0000299	Cg25C	3854.6	4282.1	5033.7	1841.9	1678.4	1625.2	-1.35557	9.07493	1.3677e-12	1.1461e-10	-2.5596
FBgn0034275	CG5002	83.53	139.05	99.907	47.266	43.666	34.538	-1.355	3.7403	4.553e-07	1.7329e-05	-2.57023
FBgn0036279	Ncc69	383.96	372.64	349.31	136.97	173.21	122.41	-1.3527	5.50623	4.4312e-12	3.4793e-10	-2.55649
FBgn0036336	ste14	124.62	104.95	98.595	48.942	31.492	48.395	-1.35245	3.77178	6.4207e-08	2.8331e-06	-2.54729
FBgn0005278	Sam-S	1728.2	1418.2	1495.4	612.83	603.92	602.29	-1.35163	7.57251	1.9054e-13	1.7593e-11	-2.55179
FBgn0020385	pug	8616	9792.4	8285.5	3456.3	2896.8	4108.5	-1.35147	10.0953	8.1853e-12	6.203e-10	-2.55161
FBgn0037978	KLHL18	477.3	623.34	452.27	178.09	207.21	225.14	-1.3478	5.9965	3.8708e-11	2.7183e-09	-2.54392
FBgn0032123	Oatp30B	434.25	435.07	388.07	144.22	192.41	161.92	-1.3348	5.69645	4.0236e-12	3.2099e-10	-2.52209
FBgn0002773	Mlc2	5643.3	8500.4	9100.3	1827.5	3404.2	3985.1	-1.3345	9.90038	1.5956e-06	5.574e-05	-2.52192
FBgn0261928	CG42795	23.051	14.684	22.023	12.749	6.6184	3.9312	-1.333	1.44353	0.0031949	0.041988	-2.56488
FBgn0028563	sut1	797.13	673.98	650.93	229.15	324.96	289.3	-1.33182	6.45064	3.6973e-11	2.6149e-09	-2.51602
FBgn0030261	CG15203	286.83	276.75	287.99	93.781	110.66	136.29	-1.32312	5.13994	2.8542e-11	2.0775e-09	-2.49924
FBgn0027348	bgm	69.344	126.76	93.731	29.371	39.44	47.418	-1.31602	3.60059	6.4287e-06	0.00018911	-2.49365
FBgn0013949	Ela	294.08	531.05	737.83	207.25	173.25	251.81	-1.30456	6.01547	5.0592e-06	0.00015381	-2.47183
FBgn0036287	CG10663	14.035	16.719	17.619	5.7156	8.5242	4.9284	-1.30025	1.17887	0.0028169	0.038479	-2.52361
FBgn0029994	CG2254	344.22	345.82	312.28	116.96	143.53	149.11	-1.29276	5.38325	9.4584e-12	7.0917e-10	-2.44707
FBgn0083058	snoRNA:Psi18S-1086	305.55	492.19	828.99	281.45	185.86	198.44	-1.28825	6.07761	2.439e-05	0.00063339	-2.44345
FBgn0031563	CG10031	58.439	42.559	47.731	25.024	10.455	25.692	-1.28334	2.68185	0.00015183	0.0032213	-2.43136
FBgn0086672	snoRNA:Or-aca5	324.06	458.93	998.49	337.9	187.38	211.27	-1.27508	6.21255	0.0002883	0.0056482	-2.41868
FBgn0082994	snoRNA:Psi28S-1837c	56.773	99.383	163.02	47.185	33.197	51.362	-1.27429	3.74264	0.00025149	0.0049956	-2.4227
FBgn0083010	snoRNA:Psi28S-1135c	197.08	245.85	540.15	201.82	78.049	127.36	-1.27335	5.35693	0.00059036	0.010537	-2.41407
FBgn0036181	Muc68Ca	87.374	104.61	66.54	36.347	42.175	28.612	-1.26928	3.4584	3.3643e-06	0.00010753	-2.41309
FBgn0030073	CG10962	2349.7	1754.1	1687.6	749.73	675.7	980.5	-1.26786	7.91589	4.0082e-09	2.1605e-07	-2.40714
FBgn0031598	CG3338	204.72	230.78	184.82	73.189	87.236	99.745	-1.25669	4.70643	9.4748e-10	5.7262e-08	-2.38429
FBgn0030398	Cpr11B	46.814	24.968	63.499	17.24	27.282	11.822	-1.25545	2.54928	0.001946	0.028454	-2.40098
FBgn0010482	l(2)01289	106.65	127.08	117.32	36.756	52.961	57.287	-1.25542	3.89214	1.4608e-07	6.1463e-06	-2.38803
FBgn0033112	Spn42Db	68.032	62.509	59.719	12.612	32.111	35.576	-1.24763	3.03366	0.00014886	0.0031719	-2.36939
FBgn0034497	CG9090	49.305	43.734	71.309	14.452	28.793	25.681	-1.24597	2.82026	0.00015809	0.0033259	-2.38441
FBgn0053307	CG33307	564.96	458.75	529.94	238.89	164.72	251.8	-1.24575	6.02673	2.559e-09	1.4336e-07	-2.3705
FBgn0002564	Lsp1gamma	214140	221590	226790	97172	66497	116900	-1.23964	14.7609	1.6245e-08	7.9802e-07	-2.36134
FBgn0031305	Iris	33.678	27.929	24.315	7.1194	20.655	8.8709	-1.22339	1.95709	0.0027498	0.03777	-2.34469
FBgn0033128	Tsp42Eg	141.72	85.046	84.222	28.352	53.999	51.36	-1.22079	3.73707	6.0905e-05	0.0014358	-2.32582
FBgn0003149	Prm	1716.2	2376.3	2339.3	964.76	715.82	1081.2	-1.21942	8.08092	1.8959e-08	9.2222e-07	-2.32886
FBgn0083007	snoRNA:Psi28S-1135f	33.174	42.562	76.233	23.193	20.923	20.73	-1.21656	2.71386	0.00067181	0.011815	-2.34354
FBgn0002534	Lcp3	202.53	288.95	363.36	126.42	57.78	183.73	-1.21607	5.17448	0.00025723	0.0050895	-2.32338
FBgn0038674	CG14285	100.67	78.345	109.14	28.437	56.757	38.499	-1.21587	3.62257	1.3116e-05	0.00035444	-2.3296
FBgn0031649	hoe2	52.382	30.367	37.444	24.353	17.613	9.8451	-1.20519	2.41389	0.0011426	0.018408	-2.31983
FBgn0016075	vkg	2212.3	2381	2762.2	1313	956.83	926.12	-1.20205	8.27959	4.2017e-09	2.2406e-07	-2.30151
FBgn0004117	Tm2	1170	1390.1	1387.9	512.6	543.41	666.5	-1.19649	7.38435	5.2322e-10	3.2815e-08	-2.292
FBgn0260964	Vmat	27.219	33.435	35.278	14.921	9.8394	16.798	-1.19605	2.10025	0.00048288	0.0088354	-2.30837
FBgn0002772	Mlc1	1477	2012.5	1931.2	586.57	763.23	1021	-1.19312	7.8424	2.2081e-07	9.0614e-06	-2.28644
FBgn0011286	Rya-r44F	52.655	72.471	83.598	39.218	25.809	25.656	-1.18909	3.17014	4.8428e-05	0.0011693	-2.30169
FBgn0053056	CG33056	189.9	153.02	172.26	74.274	90.081	63.168	-1.17637	4.46334	3.7292e-08	1.7377e-06	-2.2643
FBgn0038795	CG4335	100.72	81.608	94.921	27.593	48.928	46.42	-1.17418	3.58405	8.9648e-06	0.00025615	-2.25514
FBgn0029118	Sucb	1216.8	1447	1502	673.34	526.43	645.74	-1.17401	7.46846	1.074e-09	6.3371e-08	-2.25726
FBgn0262722	CG43166	1487.9	1851.7	1173.1	985.75	264.67	754.37	-1.17045	7.58532	0.00097371	0.016129	-2.25096
FBgn0261451	trol	5687.6	7197.3	7455.8	2613.6	2582.3	3846.8	-1.16952	9.75678	5.6293e-08	2.5173e-06	-2.24941
FBgn0022160	Gpo-1	63.659	53.642	55.174	29.064	28.646	18.737	-1.16687	2.9199	3.6647e-05	0.0009159	-2.25614
FBgn0015570	alpha-Est2	271.74	264.53	312.61	107.88	147.13	122.43	-1.16636	5.18047	3.5332e-09	1.9253e-07	-2.24905
FBgn0004028	wupA	979.3	1310.8	1254.2	272.26	593.31	724.8	-1.15611	7.24126	6.8324e-05	0.0016031	-2.2286
FBgn0039360	CLS	205.46	243.14	238.81	104.07	93.768	110.6	-1.15388	4.88207	2.228e-09	1.2624e-07	-2.22868
FBgn0037975	CG3397	1898.9	2393.1	2532.2	1034	920.77	1111.8	-1.15366	8.18638	2.7568e-09	1.5358e-07	-2.22535
FBgn0034011	CG8160	85.23	149.11	115.88	57.12	32.133	69.155	-1.14367	3.92199	0.00013181	0.0028573	-2.21087
FBgn0263468	snoRNA:SC35-a	78.107	87.352	182.01	70.816	39.888	46.391	-1.14292	3.90549	0.00072605	0.01257	-2.21184
FBgn0023516	Pex5	313.92	413.74	382.87	160.95	160.96	180.7	-1.14222	5.57441	3.1599e-09	1.7409e-07	-2.20953
FBgn0030558	CG1461	36.933	33.673	56.46	9.4254	28.158	19.749	-1.14222	2.49655	0.0032054	0.042003	-2.2163
FBgn0029167	Hml	736.71	752.15	993.35	365.78	396.02	370.26	-1.13093	6.7352	4.4613e-09	2.3664e-07	-2.19265
FBgn0000046	Act87E	590.03	834.38	841.07	236.29	424.13	374.23	-1.13004	6.60421	2.0914e-06	7.022e-05	-2.18961
FBgn0039213	atl	1362.5	1463.8	1481.6	669.01	546.51	753.39	-1.1296	7.53091	3.6932e-09	2.0016e-07	-2.18796
FBgn0082973	snoRNA:Psi28S-3308	75.267	122.92	227.66	96.739	49.935	48.348	-1.12869	4.2006	0.0024348	0.034101	-2.18358
FBgn0053093	CG33093	79.591	65.909	64.295	27.031	24.007	45.462	-1.12757	3.21017	0.00011838	0.0026176	-2.17404
FBgn0032820	fbp	498.28	674.88	702.92	267.42	302.93	288.31	-1.12567	6.33358	2.0254e-08	9.7104e-07	-2.18489
FBgn0036337	CG11255	1312.9	1579.8	1826.6	790.61	615.33	762.25	-1.12141	7.66457	2.438e-08	1.1522e-06	-2.17661
FBgn0028526	CG15293	909.04	995	744.99	310.79	404.28	504.59	-1.12002	6.83396	2.2845e-07	9.2605e-06	-2.17194
FBgn0033448	hebe	37.951	33.58	41.224	19.97	18.512	12.818	-1.1196	2.34414	0.00034925	0.0066338	-2.19795
FBgn0030443	CG12715	375.63	277.85	190.61	156.54	125.75	106.61	-1.11943	5.19168	1.039e-05	0.00028941	-2.17046
FBgn0039094	CG10184	236.12	324.62	381.6	147.03	140.85	146.13	-1.11388	5.34548	1.5915e-07	6.6682e-06	-2.17124
FBgn0029866	CG3842	114.78	99.442	116.99	58.03	53.75	41.446	-1.10527	3.85479	1.7508e-06	6.0412e-05	-2.16159
FBgn0039685	Obp99b	211880	227140	245460	111680	83413	123920	-1.10137	14.8505	4.2417e-08	1.9508e-06	-2.14562
FBgn0003464	sol	425.31	469.61	424.92	232.37	188.54	195.49	-1.09746	5.83749	4.0986e-09	2.1974e-07	-2.14121
FBgn0263397	Ih	157.27	150.52	111.1	58.43	67.996	70.111	-1.09734	4.19787	1.7017e-06	5.8922e-05	-2.13135
FBgn0034885	CG4019	348.42	299.38	518.78	154.09	148.08	242.95	-1.09683	5.65907	1.7057e-05	0.00045119	-2.14004
FBgn0032782	Rab9	30.861	32.341	31.247	12.231	15.11	16.793	-1.09406	2.1177	0.00075296	0.012946	-2.14005
FBgn0085330	CG34301	21.897	27.877	32.077	8.8425	11.673	17.796	-1.0865	1.92038	0.0039625	0.048424	-2.13646
FBgn0030615	Cyp4s3	1542.7	1458.2	1370.9	638.22	709.7	716.83	-1.0826	7.56736	2.0296e-09	1.1565e-07	-2.11735
FBgn0028920	CG8997	971.16	871.97	2282.8	732.88	497.71	722.77	-1.07886	7.4842	0.00070508	0.012273	-2.11222
FBgn0053519	Unc-89	136.73	154.95	132.56	62.635	73.985	64.172	-1.07784	4.218	3.5374e-07	1.3888e-05	-2.11283
FBgn0262972	CR43283	1062.7	1319.2	521.2	336.31	662.91	377.14	-1.07673	6.97992	0.00077172	0.013223	-2.10926
FBgn0034920	CG5597	38.536	58.996	60.213	16.107	27.809	30.628	-1.0752	2.81791	0.00094873	0.015768	-2.11613
FBgn0027610	Dic1	389.32	412.58	279.16	115.75	196.59	201.45	-1.07519	5.55981	8.381e-06	0.00024135	-2.10409
FBgn0029648	CG3603	360.94	350.4	375.43	191.02	159.21	165.87	-1.07262	5.56584	5.1835e-09	2.7063e-07	-2.10574
FBgn0259736	CG42390	117.16	164.83	129.54	68.634	64.559	62.197	-1.07101	4.17551	1.6568e-06	5.7566e-05	-2.1062
FBgn0034603	Glycogenin	764.15	864.57	806.31	247.75	409.47	502.62	-1.07038	6.72797	6.2114e-06	0.00018545	-2.09945
FBgn0263111	cac	67.816	72.578	86.853	48.408	26.482	33.562	-1.05834	3.33499	0.00012011	0.002644	-2.09537
FBgn0083027	snoRNA:Psi18S-531	146.73	194.53	447.78	161.66	82.38	135.28	-1.05832	5.108	0.0032422	0.042318	-2.08014
FBgn0039102	SPE	160.22	276.26	213.92	101.52	98.018	112.57	-1.057	4.83367	3.7207e-06	0.00011741	-2.08389
FBgn0036833	CG3819	41.849	108.72	71.461	47.574	24.763	34.554	-1.05128	3.30572	0.0033275	0.043228	-2.07716
FBgn0017429	CG5989	155.95	171.94	231.55	100.16	81.176	87.871	-1.04778	4.61823	1.3537e-06	4.7869e-05	-2.0781
FBgn0002533	Lcp2	334.78	610.02	631.08	181.03	168.73	415.8	-1.04137	6.10989	0.0015981	0.024037	-2.05847
FBgn0015323	VAChT	53.017	54.572	40.883	30.895	24.322	16.76	-1.0401	2.75588	0.00076325	0.0131	-2.06277
FBgn0031995	CG8475	723.6	884.45	635.08	324.3	307.48	461.15	-1.03837	6.62075	1.5718e-06	5.5191e-05	-2.0524
FBgn0039156	CG6178	330.94	308.06	354.42	138.43	183.99	160.94	-1.03778	5.44819	4.3703e-08	1.9991e-06	-2.05524
FBgn0026315	Ugt35a	96.262	71.685	106.04	23.25	60.962	49.38	-1.03514	3.60977	0.0010192	0.016746	-2.05092
FBgn0013308	Odc2	96.004	126.99	108.52	37.482	63.18	61.233	-1.03314	3.88116	4.6639e-05	0.0011399	-2.04771
FBgn0039023	CG4723	322.23	289.04	291.27	143.64	105.12	193.58	-1.03113	5.31452	4.1012e-06	0.00012662	-2.04038
FBgn0259716	CG42370	1581.3	1917.7	1688.4	912.8	682.33	949.87	-1.02736	7.83168	2.2765e-07	9.2605e-06	-2.03827
FBgn0031559	CG3513	287.01	275.47	203.26	149.91	69.642	157.03	-1.02549	5.08139	0.00017292	0.0035776	-2.0334
FBgn0038129	CG8449	517.83	671.43	579.22	285.71	245.42	340.67	-1.02053	6.2837	4.6236e-07	1.7531e-05	-2.02854
FBgn0086450	su(r)	128.58	149.58	191.62	70.009	94.343	67.122	-1.01307	4.37988	1.5791e-05	0.0004233	-2.02952
FBgn0028544	CG16884	115.34	122.92	188.02	69.336	63.573	78.016	-1.0085	4.24255	4.749e-05	0.001155	-2.021
FBgn0263846	CG43707	31.876	26.828	25.591	16.672	14.262	10.847	-1.00637	1.99842	0.0035515	0.045404	-2.01754
FBgn0031012	CG8051	51.054	61.288	59.253	31.51	32.014	21.7	-0.99713	2.96291	0.00029664	0.0057889	-2.01346
FBgn0083047	snoRNA:Psi18S-1377e	85.063	150.51	185.07	88.026	43.84	79.005	-0.99382	4.22869	0.0014786	0.022719	-1.99479
FBgn0039467	CG14253	187.14	179.64	173.98	117.05	80.305	74.026	-0.99197	4.59236	3.9694e-06	0.00012331	-1.99262
FBgn0031737	obst-E	26.25	36.762	40.882	19.968	16.738	14.8	-0.99058	2.2686	0.0025081	0.034883	-2.01712
FBgn0036449	bmm	257.83	208.83	244.82	92.848	111.41	156.05	-0.98398	4.98913	9.1099e-06	0.00025808	-1.97464
FBgn0032280	CG17105	87.734	161.55	170.88	68.478	40.41	103.74	-0.98186	4.23241	0.0028801	0.039001	-1.97605
FBgn0033170	sPLA2	801.18	840.2	977.62	404.46	415.06	506.54	-0.98135	6.86182	2.324e-07	9.3827e-06	-1.97502
FBgn0038294	Mf	924.79	1064.2	923.91	204.37	627.25	645.8	-0.97936	7.01606	0.0024155	0.033879	-1.97161
FBgn0004507	GlyP	1698.5	2325	2340.7	937.05	1019.9	1273.7	-0.97795	8.14272	2.2855e-06	7.5467e-05	-1.96994
FBgn0053988	CG33988	49.436	47.994	47.622	36.982	13.802	22.702	-0.97725	2.74115	0.0037518	0.047001	-1.97387
FBgn0037070	CG11309	319.33	378.09	344.56	180.92	174.44	173.77	-0.97613	5.5375	8.4634e-08	3.6694e-06	-1.96923
FBgn0259229	CG42329	38.78	42.358	40.155	20.641	20.099	20.734	-0.97435	2.49525	0.0010287	0.016872	-1.97308
FBgn0034789	PIP5K59B	51.331	41.374	41.904	30.095	20.858	17.753	-0.96577	2.64484	0.0018012	0.026689	-1.9592
FBgn0005666	bt	845.97	1116.8	1259.3	497.76	531.72	621.08	-0.96421	7.16591	2.5549e-06	8.326e-05	-1.95211
FBgn0259927	CG42450	41.492	41.274	38.819	24.118	17.443	20.733	-0.96166	2.50519	0.0012666	0.020017	-1.95179
FBgn0032889	CG9331	472.52	614.94	969.43	345.16	377.62	332.73	-0.96076	6.5197	8.6116e-05	0.0019696	-1.94872
FBgn0035551	CG7465	56.993	58.357	128.79	39.549	40.198	45.428	-0.95864	3.46565	0.003783	0.047189	-1.95039
FBgn0259225	Pde1c	118.86	135.12	186.87	67.511	78.918	79.984	-0.95419	4.30919	4.8645e-05	0.0011709	-1.94711
FBgn0036813	Aut1	168.44	189.61	186.93	89.082	90.514	101.71	-0.95244	4.61656	6.7959e-07	2.5462e-05	-1.93732
FBgn0003373	Sgs3	3511	3574.3	1717.7	1241.7	1391.4	1925.4	-0.94961	8.62061	0.00054101	0.0097911	-1.93112
FBgn0262508	CG43078	199.49	207.42	171.48	117.63	86.123	96.756	-0.94568	4.70605	3.1612e-06	0.00010136	-1.9247
FBgn0000116	Argk	4958.5	6673	7722.3	3073.7	3227.6	3808.3	-0.93673	9.76074	6.9574e-06	0.00020346	-1.9144
FBgn0053138	CG33138	1213.5	1108	1186.3	454.43	774.87	604.26	-0.93582	7.29863	1.1832e-05	0.00032327	-1.91311
FBgn0039674	CG1907	544.2	690.58	771	327.71	339.64	381.14	-0.93436	6.49318	2.0808e-06	7.0102e-05	-1.91302
FBgn0051781	CR31781	52.858	66.75	50.996	22.81	29.326	37.545	-0.93106	2.98453	0.0013723	0.021348	-1.90234
FBgn0259734	CG42388	68.446	110.28	113.41	64.027	42.512	46.394	-0.92506	3.73363	0.00071264	0.012381	-1.91022
FBgn0260945	Atg1	561.1	722.72	591.35	290.41	343.15	356.45	-0.92155	6.4017	1.9331e-06	6.6244e-05	-1.89409
FBgn0038290	CG6912	52.079	46.958	54.671	35.941	25.944	18.733	-0.91999	2.83812	0.001925	0.02823	-1.90662
FBgn0085377	CG34348	121.85	100.61	127.19	58.538	72.43	53.3	-0.91893	3.9947	5.4788e-05	0.0013008	-1.89751
FBgn0030394	Cpr11A	148.74	93.95	93.046	79.071	34.59	64.188	-0.9184	3.94316	0.0026828	0.037054	-1.88776
FBgn0033292	Cyp4ad1	66.197	60.347	69.507	31.234	28.273	44.461	-0.91632	3.1815	0.00063961	0.011289	-1.88569
FBgn0030245	CG1637	633.04	426.56	580.15	274.89	266.55	327.83	-0.91611	6.21084	1.0589e-05	0.00029331	-1.88635
FBgn0085465	CG34436	66.15	89.967	46.054	32.902	34.32	40.495	-0.91329	3.23188	0.0023279	0.033021	-1.87687
FBgn0030051	spirit	1481.7	1585.3	1400.6	821.02	655.54	898.53	-0.91184	7.65568	1.9714e-06	6.7326e-05	-1.88102
FBgn0023416	Ac3	43.376	34.683	35.902	20.653	15.707	24.7	-0.90579	2.44021	0.0038896	0.047767	-1.86638
FBgn0034628	Acox57D-p	450.13	411.8	448.25	207.02	235.71	257.72	-0.9038	5.89233	1.1052e-06	3.9786e-05	-1.87048
FBgn0035039	CG3608	51.296	41.401	46.092	26.503	29.573	17.749	-0.9034	2.70628	0.0024765	0.034491	-1.87997
FBgn0035499	Chd64	723.43	973.73	806.5	357.94	479.96	505.55	-0.89811	6.82593	1.1359e-05	0.00031204	-1.8636
FBgn0004595	pros	2570	2945.1	1767.3	1131.9	1628.7	1153.2	-0.89594	8.36562	0.00011957	0.002638	-1.8607
FBgn0033437	CG12926	666.96	959.07	669.06	407.13	409.32	417.66	-0.89511	6.70189	8.3983e-06	0.00024135	-1.85971
FBgn0035169	CG13890	791.5	846.83	899.35	421	482.44	465.05	-0.89018	6.84781	7.2528e-07	2.6987e-05	-1.85437
FBgn0001325	Kr	376.31	321.27	228.86	126.65	193.25	181.69	-0.88828	5.40247	0.00013827	0.002978	-1.84701
FBgn0004652	fru	213.62	199.77	204.97	130.01	106.43	97.73	-0.88558	4.82091	3.7441e-06	0.00011757	-1.85044
FBgn0261259	Fhos	229.24	317.65	244.02	142.03	134.07	152.06	-0.88511	5.17408	1.0054e-05	0.00028241	-1.84723
FBgn0038147	CCHa2	536.54	528.9	565.45	315.65	217.52	350.55	-0.8842	6.21392	2.3132e-05	0.00060227	-1.84548
FBgn0023441	fus	540.04	623.48	504.02	243.17	325.63	335.72	-0.88332	6.24669	1.0294e-05	0.00028835	-1.84356
FBgn0035189	CG9119	402.23	471.88	485.06	250.28	238.99	246.84	-0.88277	5.95134	1.5986e-06	5.574e-05	-1.84642
FBgn0261955	kdn	237.17	298.88	287.76	141.1	170.58	134.27	-0.88169	5.23195	6.8695e-06	0.00020148	-1.84731
FBgn0263659	CR43650	85.838	71.432	58.856	48.239	31.59	38.504	-0.87367	3.339	0.0012838	0.020224	-1.82642
FBgn0041607	asparagine-synthetase	1202.3	990.84	918.43	481.94	683.28	534.15	-0.87308	7.14828	1.8091e-05	0.00047726	-1.83101
FBgn0261436	DhpD	220.29	237.89	384.95	163.66	143.28	154.03	-0.86644	5.26903	0.0001906	0.0039027	-1.82903
FBgn0051075	CG31075	29520	36861	37415	20715	15968	20261	-0.86613	12.2083	9.0053e-06	0.00025657	-1.82277
FBgn0030864	CG8173	71.432	68.163	82.579	58.519	31.554	31.571	-0.86137	3.37277	0.0024759	0.034491	-1.82643
FBgn0014863	Mlp84B	1124.1	1307.6	1435	575.99	742.45	810.65	-0.86049	7.46509	1.6905e-05	0.00044835	-1.81613
FBgn0036985	zye	343.31	365.83	308	111.45	188.74	261.72	-0.85744	5.54568	0.0008863	0.014948	-1.81015
FBgn0003930	snRNA:U4:39B	581.11	805.56	1040.2	508.27	416.72	413.69	-0.85657	6.79458	0.0001401	0.003011	-1.81288
FBgn0261673	nemy	239.12	241.03	255.15	126.2	129.92	150.1	-0.85572	5.07981	3.8184e-06	0.00011936	-1.8101
FBgn0003721	Tm1	2433.8	3061.4	2923.2	1381.4	1545.1	1729.9	-0.85421	8.58906	7.9763e-06	0.00023072	-1.80792
FBgn0014135	bnl	57.496	49.145	46.474	34.994	25.014	24.671	-0.85391	2.86282	0.0029104	0.039189	-1.80818
FBgn0262509	nrm	89.294	88.008	59.191	60.074	38.394	32.554	-0.85251	3.47198	0.0033189	0.043207	-1.80499
FBgn0014417	CG13397	151.69	160.68	171.86	98.479	73.485	95.784	-0.85225	4.4826	3.1242e-05	0.00080037	-1.80853
FBgn0031645	CG3036	128.03	117.21	118.94	44.828	89.489	68.128	-0.84747	4.08064	0.00072798	0.012581	-1.79891
FBgn0050296	RIC-3	61.669	71.336	68.248	43.174	27.318	41.48	-0.84309	3.24284	0.0014218	0.022016	-1.79735
FBgn0000640	Fbp2	118380	156360	118120	67821	63062	88730	-0.83908	14.1382	5.1122e-05	0.0012225	-1.78887
FBgn0051140	CG31140	174.59	214.05	188.72	125.05	107.35	89.825	-0.83718	4.73911	3.3766e-05	0.00085677	-1.79179
FBgn0033367	PO45	1719.7	1864.5	2574.2	756.5	1256.8	1437.7	-0.83544	8.14494	0.00084498	0.014355	-1.78453
FBgn0039538	CG12883	60.039	51.463	63.461	37.36	23.117	37.534	-0.83402	3.05094	0.0028501	0.038773	-1.78514
FBgn0263072	CG43347	151.8	158.36	140.01	131.67	53.042	68.101	-0.83138	4.38765	0.0038265	0.047401	-1.78064
FBgn0003731	Egfr	573.64	612.4	520.3	315.44	312.81	331.76	-0.83048	6.29866	5.6193e-06	0.00016929	-1.77742
FBgn0262782	Mdh1	4446.9	5310.6	4913.1	2649.3	2477.6	3170.5	-0.8222	9.40161	1.1488e-05	0.00031473	-1.7681
FBgn0036428	CG9238	373.41	423.63	252.75	158.09	253.92	185.61	-0.81409	5.60748	0.00068048	0.011947	-1.75662
FBgn0050359	Mal-A5	3999.4	4866.5	4344.5	2420.6	2309	2786.4	-0.81365	9.25352	1.0473e-05	0.00029091	-1.75764
FBgn0032129	jp	186.92	208.65	233.88	128.16	109.72	119.47	-0.81188	4.87094	2.6836e-05	0.00069329	-1.76144
FBgn0004880	scrt	80.341	75.91	77.288	38.592	48.78	46.41	-0.80384	3.46827	0.00077381	0.013236	-1.74567
FBgn0052333	CG32333	64.252	71.455	86.73	45.535	36.709	44.436	-0.80296	3.39379	0.0014163	0.021965	-1.7559
FBgn0026150	ApepP	397.14	407.19	378.92	205.42	244.26	229.07	-0.80214	5.78246	9.0424e-06	0.0002569	-1.74328
FBgn0029155	Men-b	134.09	124	158.05	71.652	87.409	78.987	-0.80083	4.28412	0.00019226	0.0039287	-1.74813
FBgn0263199	Galk	389.98	462.82	379.17	274.58	200.14	233.01	-0.79956	5.84121	4.5558e-05	0.001119	-1.74073
FBgn0032538	CG16885	215.44	119.96	269.49	123.18	106.36	117.5	-0.79913	4.81926	0.002284	0.032584	-1.743
FBgn0034468	Obp56a	167.73	98.723	220.41	110.21	89.665	79.955	-0.79532	4.50975	0.0036725	0.046424	-1.73985
FBgn0030871	CG8142	83.974	73.679	68.798	48.052	47.948	34.534	-0.79354	3.43001	0.0014763	0.022719	-1.7348
FBgn0027571	CG3523	6549.2	5778.4	6955.5	2566.9	4371.5	4199.3	-0.79189	9.80695	0.00036657	0.006897	-1.73134
FBgn0036273	CG10426	73.311	70.284	64.251	37.035	34.173	49.393	-0.79096	3.31222	0.0022921	0.032606	-1.72342
FBgn0053493	CG33493	237.02	421.14	271.08	154.95	165.06	219.23	-0.78545	5.44147	0.0011124	0.018066	-1.72324
FBgn0264542	CG43921	86.485	88.119	83.352	60.652	44.274	44.418	-0.78531	3.61414	0.0010459	0.017099	-1.72726
FBgn0023507	CG3835	365.4	351.48	350.54	204.79	212.27	202.41	-0.78488	5.64066	9.9733e-06	0.00028094	-1.72312
FBgn0022355	Tsf1	2476.3	2563.9	2793.8	1811.7	1188.9	1560	-0.78034	8.51209	0.00011369	0.0025194	-1.71776
FBgn0032010	CG8086	66.178	65.844	66.815	35.376	35.093	45.437	-0.77983	3.2514	0.0020844	0.030125	-1.7155
FBgn0033919	CG8547	257.82	222.14	234.73	90.952	149.45	176.78	-0.77871	5.06856	0.00087761	0.014833	-1.71314
FBgn0040505	Alk	77.804	71.383	58.701	43.027	41.977	36.521	-0.77779	3.31835	0.0024077	0.033864	-1.71066
FBgn0036837	CG18135	1664.3	1893.2	1725.5	902.37	865.27	1322.1	-0.77411	7.94662	0.00019299	0.0039356	-1.70985
FBgn0034629	Acox57D-d	65.087	86.889	82.866	46.258	46.138	44.427	-0.77095	3.48327	0.0014919	0.022853	-1.71639
FBgn0029873	CG3918	56.436	60.217	57.965	35.564	39.634	26.637	-0.76997	3.07085	0.0037385	0.046993	-1.71471
FBgn0031294	IA-2	443.72	549.87	495.96	346.51	295.28	231.01	-0.76933	6.12439	0.00016509	0.0034441	-1.70663
FBgn0041605	cpx	191.69	200.57	117.65	102.44	87.831	110.6	-0.7667	4.59374	0.0012193	0.019423	-1.69478
FBgn0025643	CG3588	164	159.73	218.42	104.01	90.297	124.43	-0.76275	4.67566	0.00036495	0.0068796	-1.70093
FBgn0027359	Tim8	117.36	120.48	115.95	80.4	62.732	65.157	-0.76194	4.06994	0.00035625	0.006741	-1.69855
FBgn0031808	CG9507	153.46	162.9	171.92	93.254	71.669	123.46	-0.76044	4.52948	0.00066186	0.011661	-1.69316
FBgn0001186	Hex-A	302.62	343.51	303.21	183.29	202.32	174.75	-0.7596	5.48145	3.2889e-05	0.0008388	-1.69416
FBgn0032497	CG6043	142.26	107.33	129.09	47.238	84.96	91.857	-0.75937	4.16925	0.0034634	0.044393	-1.69012
FBgn0052803	CG32803	496.81	574.38	458.04	299.77	285.06	319.92	-0.75804	6.16771	5.1844e-05	0.0012339	-1.69022
FBgn0033246	ACC	2038	1636.9	1716.7	739.24	1271.3	1179.9	-0.75719	7.98229	0.00071403	0.012383	-1.68992
FBgn0037842	CG6567	86.287	110.33	105.19	46.695	58.685	73.095	-0.75671	3.8456	0.0020485	0.029691	-1.69103
FBgn0032945	CG8665	415.68	320.57	498.89	245.28	200.92	288.34	-0.74888	5.86285	0.00061515	0.010896	-1.68151
FBgn0034856	yellow-d2	230.15	261.08	290.28	148.56	108.45	208.39	-0.74766	5.20643	0.0014896	0.022852	-1.67922
FBgn0004654	Pgd	728.81	781.04	884.17	494.8	473.06	459.12	-0.74507	6.81628	3.6172e-05	0.00090859	-1.67768
FBgn0086687	desat1	1818.1	1462.9	1816.9	966.99	967.86	1111.8	-0.74271	7.90681	7.5159e-05	0.0017511	-1.67328
FBgn0033244	CG8726	250.7	235.45	233.33	142.01	153.63	135.26	-0.73939	5.09207	4.7717e-05	0.0011577	-1.66971
FBgn0021765	scu	2335.9	2563.9	2572.9	1425.4	1445.2	1613.4	-0.73677	8.46025	4.014e-05	0.00099571	-1.66653
FBgn0015609	CadN	428.1	397.24	396.65	309.53	221.23	202.38	-0.73617	5.85285	0.00031661	0.0061186	-1.66679
FBgn0042206	GstD10	274.24	298	380.24	164.03	183.61	224.16	-0.73395	5.49443	0.00034206	0.0065304	-1.66576
FBgn0010651	l(2)08717	182.64	176.37	200.01	98.844	94.47	144.2	-0.72899	4.73477	0.00059999	0.010684	-1.65629
FBgn0000667	Actn	787.92	868.03	952.56	549.32	464.42	563.8	-0.72479	6.94772	9.2347e-05	0.0020788	-1.65353
FBgn0032029	CG17292	310.65	334.59	281.25	162.38	184.49	217.25	-0.71818	5.4636	0.00017928	0.0036861	-1.64236
FBgn0027561	CG18659	650.37	743.98	599.08	357.31	417.79	440.38	-0.71451	6.5654	0.00014455	0.0030933	-1.64004
FBgn0031912	CG5261	343.35	310.28	339.87	201.5	186.04	218.22	-0.7141	5.56429	8.8269e-05	0.0020096	-1.64009
FBgn0260943	Rbp6	134.22	149.25	94.968	87.802	67.715	76.024	-0.71294	4.18866	0.0030929	0.040905	-1.63443
FBgn0013688	mt:srRNA	203.48	313.25	287.59	171.05	186.5	133.26	-0.70834	5.26101	0.0012419	0.019657	-1.63876
FBgn0033679	CG8888	129.38	157.42	219.3	82.174	103.17	123.45	-0.70825	4.59672	0.0033292	0.043228	-1.63896
FBgn0038984	CG5315	805	705.22	718.9	483.29	404.88	476.91	-0.70804	6.72858	0.00010344	0.0023127	-1.63296
FBgn0038341	CG14869	514.47	633.37	420.07	264.69	388.01	308.05	-0.70729	6.22292	0.0012143	0.019405	-1.63196
FBgn0029791	CG4096	262.67	393.52	326.7	178.95	202.15	222.17	-0.70315	5.55217	0.00061173	0.010854	-1.62927
FBgn0036316	CG10960	576.95	649.38	757.69	328.23	330.06	561.88	-0.70127	6.56282	0.0026457	0.036592	-1.62602
FBgn0052043	CG32043	87.406	76.005	90.248	47.749	50.262	58.268	-0.69818	3.62356	0.0028345	0.038667	-1.62312
FBgn0036194	CG11652	167.99	115.17	133.9	67.297	105.27	84.911	-0.69782	4.33076	0.00355	0.045404	-1.61979
FBgn0013773	Cyp6a22	100.7	97.027	82.341	56.943	52.687	64.192	-0.69395	3.76926	0.0027103	0.037331	-1.61123
FBgn0264489	CG43897	552.41	575.69	573.08	217.99	388.61	445.35	-0.69384	6.34481	0.0038953	0.047771	-1.61717
FBgn0022359	Sodh-2	426.79	545.57	641.54	250.48	408.19	338.67	-0.69295	6.2682	0.0022981	0.032645	-1.6182
FBgn0032685	CG10211	78.431	85.908	91.686	46.025	52.838	59.257	-0.69197	3.63723	0.0030641	0.040651	-1.61918
FBgn0030274	CG1908	202.01	238.58	197.96	106.11	132.52	159	-0.68558	4.94262	0.00094659	0.015768	-1.60589
FBgn0262559	Mdh2	1158.4	1512.8	1544.9	850.58	837.02	939	-0.68214	7.65574	0.00035491	0.0067284	-1.60515
FBgn0054003	nimB3	735.79	963.74	846.37	542.65	438.29	612.19	-0.6762	6.93163	0.00068875	0.012071	-1.59805
FBgn0033451	CG1665	363.5	399.37	393.36	261.17	240.72	221.15	-0.67536	5.79596	0.00017655	0.0036375	-1.59912
FBgn0264502	CG43901	95.361	93.697	85.048	65.488	57.88	48.361	-0.67302	3.74378	0.003743	0.046993	-1.59615
FBgn0039114	Lsd-1	2967.1	3010.1	2661.3	1526.7	1971.4	1931.3	-0.67016	8.69481	0.0003995	0.0074326	-1.59106
FBgn0036007	path	372.63	302.5	313.65	173.88	248.71	201.42	-0.66514	5.57696	0.00093088	0.015549	-1.58456
FBgn0035978	UGP	353.71	420.52	411.04	233.57	231.34	282.41	-0.6648	5.83605	0.00041759	0.0077546	-1.58603
FBgn0050187	CG30187	107.53	125.99	120.19	65.843	69.495	87.9	-0.66373	4.1073	0.0024072	0.033864	-1.58445
FBgn0027570	Nep2	301.05	261.19	279.21	168.35	205	157.96	-0.66267	5.34567	0.00047867	0.0087745	-1.58373
FBgn0037635	CG9837	947.14	910.3	687.31	537.65	410.48	663.55	-0.66011	6.9381	0.0026051	0.036081	-1.57894
FBgn0034259	P32	175.61	202.83	147.98	135.06	110.69	88.832	-0.65352	4.67898	0.0027751	0.038013	-1.57337
FBgn0086906	sls	1335.1	1451.6	1724.2	1072.3	793.94	1008.1	-0.64962	7.76573	0.0010194	0.016746	-1.56937
FBgn0022774	Oat	3703.6	5388.6	4783.7	2564	2815.8	3486.4	-0.64613	9.3874	0.0017595	0.026188	-1.56503
FBgn0038038	CG5167	654.64	728.57	809.94	410.15	469.73	526.29	-0.64051	6.73043	0.00069016	0.012074	-1.55966
FBgn0039697	CG7834	939.67	1096.7	1167.9	750.97	597.76	708.93	-0.63823	7.27732	0.00075212	0.012946	-1.55724
FBgn0004797	mdy	280.68	271.14	265.97	170.05	194.83	161.91	-0.63399	5.31606	0.00049648	0.0090677	-1.5524
FBgn0030607	dob	175.75	147.41	161.88	89.724	89.472	134.33	-0.63326	4.57096	0.0036731	0.046424	-1.54705
FBgn0085466	CG34437	279.63	314.57	313.08	218.3	140.34	227.12	-0.63098	5.46578	0.0028433	0.038734	-1.54889
FBgn0028480	CG17841	148.17	170.59	153.13	110	100.63	93.787	-0.6297	4.53051	0.0011242	0.018198	-1.55014
FBgn0012034	AcCoAS	2850.8	2281.8	2432.3	1417.7	1544.1	1940.2	-0.62625	8.52066	0.0015445	0.023407	-1.54323
FBgn0085427	CG34398	256.88	252.11	224.76	149.34	155.97	171.81	-0.62373	5.16631	0.00081759	0.013937	-1.53787
FBgn0023550	CG18031	125.29	127.2	129.12	83.42	72.75	91.84	-0.62181	4.23227	0.0029004	0.039138	-1.53869
FBgn0010226	GstS1	1397.9	1373.4	1338	804.15	917.71	958.74	-0.61658	7.64482	0.00058123	0.010424	-1.53298
FBgn0262057	Spn77Ba	210.04	216.4	200.74	142.13	152.9	114.51	-0.61311	4.94395	0.0014399	0.022192	-1.53143
FBgn0035285	CG12025	275.46	263.27	229.37	136.67	205.98	161.92	-0.60776	5.2378	0.0030656	0.040651	-1.52229
FBgn0262473	Tl	395.55	341.48	327.21	230.36	228.08	247.84	-0.59375	5.7112	0.0012417	0.019657	-1.50682
FBgn0004611	Plc21C	202.14	209.65	174.43	131.32	137.67	121.43	-0.58788	4.85918	0.0019814	0.028887	-1.50151
FBgn0086679	p	254.13	278.81	243.92	165.05	179.57	175.75	-0.57871	5.26499	0.001506	0.023024	-1.4929
FBgn0003178	PyK	1120.5	1437	1599.5	893.51	960.51	933.06	-0.5759	7.67699	0.002931	0.039232	-1.49153
FBgn0262035	CG42846	581.68	537.81	520.04	379.13	350.49	381.13	-0.56251	6.34392	0.0018545	0.027397	-1.47606
FBgn0039349	Ssadh	431.26	561.07	565.1	367.62	333.72	353.48	-0.56035	6.26942	0.0034108	0.043944	-1.47649
FBgn0029969	CG10932	433.16	444.17	549.77	312.93	291.68	362.38	-0.56009	6.14399	0.0037796	0.047189	-1.47582
FBgn0086691	UK114	1581.4	1679.1	1618.5	1116.6	998.79	1196.7	-0.55886	7.91519	0.001878	0.027662	-1.47309
FBgn0037391	CG2017	293.78	291.31	348.14	213.92	191.03	229.08	-0.55569	5.5356	0.0028564	0.038806	-1.4719
FBgn0032904	Mtp	774.95	657.33	757	498.82	456.1	543.07	-0.54763	6.7656	0.0027182	0.037388	-1.46148
FBgn0261545	CG42663	255.92	284.34	229.38	166.7	173.59	187.61	-0.54611	5.26569	0.0036858	0.046525	-1.45793
FBgn0039737	CG7920	1739.5	1573.3	1782.9	1044.5	1136.5	1334	-0.53584	7.98718	0.0038118	0.047401	-1.4497
FBgn0001218	Hsc70-3	4323.6	4180.5	3863.8	5675.4	5927.9	6124.6	0.51928	9.79183	0.0030422	0.040449	1.43338
FBgn0004885	tok	556.94	547.77	490.55	683.55	832.3	783.97	0.52663	6.8467	0.0038449	0.04757	1.44166
FBgn0022153	l(2)k05819	302.77	266.79	298.27	397.94	427.82	434.45	0.53787	5.97898	0.0029177	0.039208	1.45214
FBgn0036921	RhoGDI	847.18	766.69	974.58	1358	1112.8	1313.2	0.5484	7.55479	0.0038197	0.047401	1.46188
FBgn0053080	CG33080	146.46	148.41	152.82	193.81	224.01	236.98	0.54848	5.03904	0.0033452	0.043378	1.46262
FBgn0016797	fz2	1355.7	1287.5	1067.1	1573	1838.7	2042.9	0.55515	8.07805	0.0038658	0.047638	1.47012
FBgn0051717	CG31717	158.93	131.84	160	229.68	197.72	235	0.55518	5.05288	0.0036586	0.046357	1.46949
FBgn0030808	RhoGAP15B	211.74	230.88	215.44	288.8	313.64	365.35	0.55556	5.5936	0.0028825	0.039001	1.47067
FBgn0051076	CG31076	626.61	604.75	614.74	821.51	792.36	1111.8	0.56159	7.07697	0.0038995	0.047771	1.47645
FBgn0036410	CG8100	1594.8	1536.3	1325.2	1980.2	2278.3	2339.1	0.56552	8.34806	0.0021679	0.031105	1.48051
FBgn0003888	betaTub60D	1311.3	1613	1265.7	1862.9	2347.3	1993.5	0.566	8.25936	0.0032684	0.042604	1.4806
FBgn0011327	Uch-L3	154.49	142.88	149.97	205.47	218.05	239.94	0.56696	5.0499	0.00208	0.030104	1.48312
FBgn0038747	RhoGAP92B	357.32	410.44	364.04	515.14	515.67	648.73	0.56883	6.37837	0.0028817	0.039001	1.48395
FBgn0036741	CG7510	154.49	159.45	131.39	198.79	211.27	254.77	0.57299	5.04914	0.0031786	0.041927	1.49289
FBgn0028542	nimB4	413.73	544.16	420.8	679.68	622.17	751.4	0.57413	6.66485	0.0029253	0.039208	1.48928
FBgn0002284	Pros26	412.11	406.17	428.92	531.51	637.55	690.19	0.57596	6.5217	0.0019385	0.028386	1.49074
FBgn0039208	Esyt2	211.64	239.85	251.95	310.25	339.64	397.93	0.57639	5.69993	0.0025409	0.03529	1.48957
FBgn0262870	axo	235.48	242.22	301.83	350.76	379.08	431.5	0.57776	5.8471	0.0029559	0.03946	1.4898
FBgn0035763	CG8602	285.09	241.21	306.68	405.45	394.12	443.34	0.57822	5.94352	0.0021033	0.030354	1.49212
FBgn0000719	fog	268.34	304.31	201.86	370.71	384.99	406.8	0.58211	5.84454	0.0033737	0.043692	1.50095
FBgn0033373	CG8080	446.37	555.44	497.47	634.72	691.83	919.28	0.58289	6.79024	0.0038653	0.047638	1.49794
FBgn0020647	KrT95D	495.81	672.38	471.65	747.19	771.55	945.92	0.58701	6.92204	0.0038695	0.047638	1.50299
FBgn0035496	CG14990	373.36	360.38	344.78	489.5	527.54	606.26	0.58852	6.32144	0.0015197	0.023104	1.50512
FBgn0041710	yellow-f	986.51	1165.8	1058.8	1683.3	1471.1	1687.4	0.59258	7.89179	0.0011506	0.018451	1.50783
FBgn0263864	Ark	304.41	347.93	290.08	370.28	532.92	522.33	0.59597	6.13225	0.0034415	0.044282	1.51263
FBgn0004509	Fur1	428.03	408.42	434.89	622.64	577.7	723.76	0.59755	6.56231	0.001139	0.018379	1.51344
FBgn0035715	CG10103	194.22	198.5	164.08	246.63	299.59	299.18	0.59854	5.38248	0.0015477	0.02342	1.51832
FBgn0029896	CG3168	557.54	716.07	623.74	766.74	1074	1033.8	0.59946	7.13866	0.0029239	0.039208	1.51503
FBgn0032421	crok	139.51	105.17	153.5	204.02	197.07	201.42	0.60025	4.90156	0.0029852	0.039797	1.51316
FBgn0030262	Vago	2414.7	2184.6	2168.1	3308.4	2701.3	4251.6	0.60033	8.97078	0.003603	0.045886	1.51628
FBgn0034538	CG16799	501.49	462.95	360.58	647.4	553.2	814.62	0.60256	6.62599	0.0039743	0.048509	1.5209
FBgn0039130	CG5854	979.46	1188	1001.1	1502.1	1514.7	1797	0.60315	7.87917	0.0012832	0.020224	1.51924
FBgn0031458	aph-1	97.968	103.67	88.121	148.67	146.77	146.13	0.60394	4.45687	0.0020085	0.029239	1.52392
FBgn0031589	CG3714	603.57	681.56	592.83	839.62	798.16	1219.4	0.60485	7.12752	0.0036276	0.046141	1.52143
FBgn0031117	CG1702	172.1	161.86	175.04	271.83	249.88	252.76	0.60613	5.25626	0.00085703	0.014535	1.52155
FBgn0010350	CdsA	144.74	153.87	131.2	183.8	214.68	257.73	0.60654	5.01793	0.0023967	0.033853	1.52674
FBgn0037710	CG9393	210.01	227.5	199.39	284.63	306.87	380.17	0.60717	5.57853	0.0015077	0.023024	1.52562
FBgn0040918	schlank	1032.6	943.96	966.72	1540.4	1256.2	1690.4	0.60788	7.77594	0.0012931	0.020339	1.52449
FBgn0011705	rost	101.55	87.162	100.76	141.12	149.33	151.07	0.60844	4.45599	0.0021117	0.030431	1.52526
FBgn0051641	stai	237.71	176.46	180.27	311.41	350.97	249.77	0.61487	5.48542	0.0029121	0.039189	1.53447
FBgn0033366	Ance-4	2262.8	2322.8	2019.9	2939.8	3338.4	3851.7	0.6166	8.94577	0.0011157	0.01809	1.53356
FBgn0031689	Cyp28d1	644.29	519.09	702.88	910	783.86	1170.1	0.61798	7.12604	0.0032315	0.042234	1.5346
FBgn0063491	GstE9	157.92	164.01	166.2	198.55	238.1	314.03	0.61994	5.20536	0.0031862	0.041972	1.53787
FBgn0026404	Nc	178.32	148.59	188	230.11	276.9	285.36	0.62244	5.28239	0.0013869	0.021543	1.53885
FBgn0259984	kuz	440.36	470.73	416.18	624.15	729.08	692.14	0.62314	6.63996	0.00055353	0.0099816	1.54104
FBgn0038981	CG5346	138.76	111.69	111.83	165.73	209.11	185.62	0.62392	4.7867	0.0015248	0.023143	1.54704
FBgn0040153	l(1)G0469	155.27	165.09	160.39	191.08	317.72	232.02	0.6241	5.18581	0.0040719	0.04964	1.54097
FBgn0037730	CG9444	2038.8	1806.4	1702.1	2200.4	2833.5	3523	0.62493	8.6992	0.0029382	0.039275	1.54253
FBgn0033724	CG8501	448.43	436.19	373.46	742.02	642.5	557.84	0.62541	6.56481	0.0010635	0.017356	1.54391
FBgn0035444	CG12012	139.5	132.78	126.53	173.9	213.97	229.09	0.6257	4.92295	0.0013332	0.020903	1.547
FBgn0260955	CG42587	727.1	904.54	673.5	1318.4	892.75	1354.7	0.62889	7.43693	0.0034589	0.044393	1.54691
FBgn0039844	CG1607	283.36	251.16	277.52	313.23	534.98	407.78	0.62895	5.93831	0.0037234	0.04694	1.54671
FBgn0039965	CG13865	121.86	122.65	101.68	175.85	156.58	207.37	0.63441	4.72878	0.0015199	0.023104	1.55926
FBgn0034093	CG15706	192.3	238.49	177.51	290.51	317.92	337.69	0.63483	5.52985	0.00089983	0.015106	1.55535
FBgn0036302	sowah	77.55	102.37	72.045	137.19	132.55	122.42	0.63579	4.27786	0.0039105	0.047848	1.55641
FBgn0011704	RnrS	105.78	113.83	127.14	205.98	190.53	142.15	0.64113	4.72824	0.0024063	0.033864	1.55345
FBgn0030593	CG9512	405.1	429.43	360	537.3	623.23	705.99	0.6423	6.50073	0.00073729	0.01272	1.56256
FBgn0037009	CG5104	86.637	70.41	74.468	116.35	119.06	128.37	0.6458	4.16639	0.0019515	0.028492	1.5713
FBgn0035049	Mmp1	308.14	295.6	244.42	347.17	552.52	430.48	0.64707	6.0129	0.0023783	0.03364	1.5683
FBgn0036988	CG5262	245.54	234.19	170.62	280.37	397.98	343.6	0.64765	5.63454	0.002193	0.03142	1.57138
FBgn0039561	mfrn	194.27	184.07	161.04	210.83	286.05	351.55	0.64973	5.36771	0.0027598	0.037855	1.57297
FBgn0027280	l(1)G0193	363.6	333.73	390.01	542.47	513.95	658.6	0.65764	6.37399	0.00057963	0.010415	1.57726
FBgn0086372	lap	520.55	647.98	520.23	658.41	1021.2	985.41	0.65777	7.0069	0.0020339	0.029565	1.57809
FBgn0037647	RagA	106.69	109.4	124.2	152.45	193.09	190.57	0.65879	4.71332	0.00098202	0.016213	1.57545
FBgn0000454	Dip-B	1142.6	1533.9	1493.2	2055.5	2202.7	2350.9	0.66499	8.31179	0.00053457	0.0096923	1.58503
FBgn0000042	Act5C	13219	15607	13390	22183	22366	22449	0.66629	11.6509	0.00018731	0.0038432	1.58703
FBgn0039238	CG7016	108.45	117.14	121.49	178.31	150.6	222.19	0.66738	4.74805	0.0013611	0.021207	1.58782
FBgn0053459	CG33459	318.59	319.09	313.4	484.69	459.45	569.73	0.66975	6.19002	0.00030356	0.0058894	1.59174
FBgn0031432	Cyp309a1	1941.4	2205.7	2068.3	2997.7	3135.3	3773.7	0.67256	8.89197	0.00032939	0.0063533	1.5939
FBgn0032726	CG10621	1264.3	1933.1	1522.2	1961.8	2609.6	2953.2	0.673	8.49545	0.0024618	0.034383	1.59433
FBgn0027932	Akap200	1240.1	1196	975.05	1711.9	2094	1653.8	0.67794	8.03125	0.00043655	0.0080748	1.60055
FBgn0038974	CG5377	111.46	77.215	90.762	131.03	131.44	186.65	0.67842	4.4515	0.0033784	0.043695	1.60723
FBgn0039113	CG10217	330.96	322.47	326.69	504.52	514.98	550.96	0.67968	6.23907	0.00015343	0.0032484	1.60231
FBgn0037167	CG11425	184.6	166.26	149.16	264.23	261.64	279.43	0.68236	5.28077	0.00021454	0.0043395	1.61054
FBgn0036030	CG6767	3217.8	3318	2589	4327.4	4563.8	5762.3	0.68308	9.45213	0.00051172	0.0093288	1.6059
FBgn0262148	CR42874	98.839	115.8	79.739	135.95	157.67	181.7	0.68399	4.5297	0.0015131	0.023072	1.61466
FBgn0030469	CG15745	81.899	95.926	103.39	155.33	132.28	162.93	0.685	4.45778	0.0010656	0.017364	1.60212
FBgn0051324	CG31324	54.652	63.48	53.777	96.714	93.969	85.89	0.68533	3.76937	0.002413	0.033879	1.60883
FBgn0033945	CG12868	91.542	107.15	132.47	161.67	173.58	195.51	0.68801	4.68974	0.0010855	0.017658	1.60272
FBgn0051778	CG31778	948.08	879.08	647.39	1047.5	1366.5	1576.9	0.68832	7.57578	0.0015872	0.023909	1.61278
FBgn0036240	CG6928	90.764	123.53	85.456	145.11	143.19	197.51	0.69253	4.55835	0.0020382	0.029586	1.62072
FBgn0033017	CG10465	75.876	72.595	81.375	117.99	124.99	128.36	0.69365	4.1805	0.00086842	0.014703	1.6156
FBgn0052666	Drak	225.16	231.91	169	317.81	362.52	335.7	0.6939	5.60868	0.00033102	0.0063725	1.62287
FBgn0013762	Cdk5	77.832	77.933	47.474	110.66	111.57	109.6	0.69442	4.01771	0.0031621	0.041765	1.63271
FBgn0025109	Bem46	58.9	74.71	82.416	102.15	109.77	136.28	0.69473	4.09039	0.0031958	0.041988	1.61184
FBgn0052672	Atg8a	1049.5	896.02	894.26	1103.5	1765.2	1736.8	0.69707	7.77893	0.0012192	0.019423	1.62178
FBgn0040398	CG14629	4138.1	4684.7	3895.2	6733.5	6405	7498.1	0.69822	9.94011	0.00012951	0.0028137	1.62263
FBgn0030025	CG2147	64.407	64.722	65.331	82.974	129.62	103.67	0.70122	3.95127	0.0036413	0.046256	1.62637
FBgn0003514	sqh	529.57	569.94	430.2	800.18	888.46	804.7	0.70326	6.89352	0.00017464	0.0036056	1.62994
FBgn0030850	CG8408	67.262	50.36	55.185	82.323	99.919	100.72	0.70355	3.79184	0.0025643	0.035566	1.63745
FBgn0050273	CG30273	61.596	79.091	74.091	106.35	110.61	132.33	0.70413	4.09042	0.001574	0.023746	1.62628
FBgn0039637	CG11880	340.78	319.08	285.74	443.15	595.92	506.51	0.70693	6.20542	0.00027158	0.0053416	1.6345
FBgn0031897	CG13784	677.11	615.83	502.98	818.03	970.47	1147.4	0.70732	7.1267	0.00046923	0.0086331	1.63476
FBgn0040850	CG15210	122.64	134.89	114.8	226.56	174.16	208.34	0.70757	4.8747	0.00031604	0.0061186	1.63581
FBgn0039528	dsd	143.06	122.86	136.53	217.17	218.06	223.15	0.70865	4.98537	0.00012912	0.0028137	1.63593
FBgn0042135	CG18812	215.18	259.82	237.6	251.07	520.03	393.96	0.70929	5.80024	0.0037629	0.047081	1.63494
FBgn0020416	Idgf1	221.48	234.24	218.48	292.69	380.89	430.52	0.7103	5.72239	0.00036335	0.0068624	1.63764
FBgn0029121	Sras	48.593	39.209	50.129	77.684	73.769	74.049	0.71036	3.47593	0.0030904	0.040905	1.63489
FBgn0086370	sra	237.56	236.38	167.67	259.53	347.23	447.33	0.71235	5.65433	0.0021558	0.031016	1.64288
FBgn0031126	Cyp6v1	193.16	219.71	207.87	274.55	347.31	397.94	0.71593	5.60707	0.00033224	0.0063837	1.64288
FBgn0260743	CG18347	309.58	404.74	330.01	493.53	561.11	662.55	0.71711	6.35308	0.00034909	0.0066338	1.6443
FBgn0034756	Cyp6d2	355.61	365.95	366.7	612.04	466.71	710.94	0.7173	6.41232	0.00037381	0.0070069	1.64454
FBgn0034741	CG4269	323.92	371.25	249.34	459.72	577.36	521.33	0.71987	6.21223	0.00043458	0.008055	1.64997
FBgn0046763	CG17278	178.68	136.17	103.95	192.86	255.22	245.86	0.72034	5.05362	0.0013383	0.020917	1.65697
FBgn0015924	crq	258.63	233.29	253.8	387.19	400.89	441.37	0.72058	5.87281	7.9355e-05	0.001836	1.64868
FBgn0027070	CG17322	42.184	54.574	53.189	72.439	83.051	90.852	0.72067	3.59574	0.0034605	0.044393	1.64286
FBgn0004629	Cys	1308.9	1239.6	1160.1	1994.5	1855.2	2266	0.72116	8.17826	7.8322e-05	0.0018163	1.64906
FBgn0003162	Pu	1788.1	1890.9	1305.2	2305.5	2837.8	3078.6	0.72153	8.60446	0.00053029	0.0096321	1.64959
FBgn0034897	Sesn	482.68	538.75	466.66	632.88	960	871.85	0.72743	6.86818	0.00033631	0.0064494	1.6563
FBgn0067102	GlcT-1	72.324	86.819	63.14	101.2	132.67	136.27	0.72975	4.16029	0.0014322	0.022115	1.66517
FBgn0037553	CG18249	229.43	242.05	222.99	358.26	386.69	407.79	0.72988	5.777	4.7038e-05	0.0011469	1.65988
FBgn0036058	CG6707	450.88	525.33	445.88	658.64	793.52	912.35	0.73285	6.80641	0.00015916	0.0033414	1.6627
FBgn0037623	CG9801	126.94	171.49	119.65	172.02	303.51	220.17	0.73318	5.05491	0.0022564	0.032236	1.66404
FBgn0051436	CG31436	85.479	111.32	83.747	135.98	132.21	200.48	0.73679	4.49138	0.0016507	0.024716	1.67056
FBgn0036857	CG9629	756.96	964.93	918.79	1395.6	1391.5	1615.3	0.73786	7.69904	9.232e-05	0.0020788	1.66715
FBgn0036927	CG7433	89.853	97.132	117.89	163.44	193.23	149.07	0.73813	4.60361	0.00043726	0.0080748	1.65884
FBgn0031261	nAcRbeta-21C	1409.4	1452.6	1364.8	2152	2034.6	2879.2	0.74105	8.37892	0.00015676	0.0033048	1.67167
FBgn0013305	Nmda1	686.04	522.32	523.33	911.63	917.53	1069.3	0.74139	7.09556	0.00012227	0.0026856	1.67378
FBgn0051522	CG31522	781.2	804.2	537.67	1027.1	1075.1	1451.5	0.74174	7.38863	0.00070519	0.012273	1.67385
FBgn0035904	CG6776	196.53	222.13	290.97	507.81	336.01	346.54	0.74964	5.81757	0.00097691	0.016155	1.67744
FBgn0041604	dlp	92.772	95.8	66.491	132.79	158.74	140.2	0.75025	4.36957	0.00060958	0.010836	1.69264
FBgn0029830	Grip	88.143	103.65	93.663	109.15	194.21	177.74	0.75234	4.52409	0.001738	0.025906	1.68537
FBgn0027106	inx7	1726.7	1224.1	1085.3	1678.4	2258.1	2873.3	0.75406	8.32075	0.0017653	0.026235	1.68722
FBgn0038039	CG5196	475.08	371.68	370.34	589.32	642.37	825.48	0.75502	6.59761	0.00019734	0.004016	1.69022
FBgn0034371	SP2637	116.3	151.54	132.23	206.27	238.34	230.06	0.75563	5.00413	0.00010388	0.0023175	1.68638
FBgn0039073	CG4408	635.32	681.67	684.33	1154.6	948.31	1279.6	0.75726	7.31249	6.5652e-05	0.0015441	1.69014
FBgn0035498	Fit1	431.5	494.07	401.55	615.66	747.36	887.68	0.76092	6.72497	0.00012924	0.0028137	1.69593
FBgn0002524	lace	200.55	160.8	165.22	275.65	280.01	339.68	0.76123	5.40304	7.4558e-05	0.0017412	1.70032
FBgn0037203	slif	83.607	112.53	105.18	150.88	191.51	166.86	0.76189	4.60353	0.00024386	0.0048733	1.69008
FBgn0034909	CG4797	79.512	67.068	75.658	116.27	124.95	137.26	0.76492	4.18009	0.0003011	0.0058599	1.70304
FBgn0034543	CG30152	1024.2	804.44	594.25	1090.5	1309.3	1723	0.7657	7.59359	0.0013361	0.020917	1.7016
FBgn0261984	Ire1	233.9	205.45	246	319.18	407.76	439.4	0.76715	5.7805	9.5593e-05	0.002147	1.70182
FBgn0032262	CG7384	114.93	94.914	89.692	170.11	142.24	200.46	0.76772	4.6066	0.00025904	0.0051151	1.71201
FBgn0001229	Hsp67Bc	97.714	119.37	137.15	204.86	248.81	147.07	0.76786	4.83669	0.0011481	0.018451	1.69588
FBgn0039178	CG6356	478.26	594.34	413.92	739.67	834.58	960.73	0.76868	6.89299	0.00013585	0.0029386	1.70531
FBgn0032479	CG16974	623.01	711.63	579.73	955.23	1102.2	1213.5	0.77205	7.25845	4.6451e-05	0.0011381	1.70862
FBgn0010497	dmGlut	76.55	110.19	89.28	124.24	186.6	160.94	0.7746	4.48947	0.00083986	0.014292	1.70922
FBgn0032731	CG10641	85.618	78.199	88.831	137.81	175.76	118.46	0.7761	4.36537	0.00054355	0.0098193	1.71001
FBgn0030711	Rrp47	47.692	43.573	46.046	82.675	76.264	77.01	0.77915	3.51423	0.0009478	0.015768	1.71835
FBgn0038149	CG9796	762.51	659.6	833.69	1221.3	1247.2	1403.1	0.77968	7.49865	2.8835e-05	0.00074109	1.71629
FBgn0037007	CG5059	1545.4	1641	1162.5	2099	2649.9	2740.9	0.78365	8.44702	0.00012802	0.0027995	1.72223
FBgn0001208	Hn	1922.1	1882.2	1964.2	2696.1	3353.6	3890.3	0.78494	8.85455	6.0291e-05	0.0014247	1.72315
FBgn0053460	CG33460	90.125	73.785	84.565	147.05	122.15	161.95	0.79176	4.35436	0.00024628	0.0049019	1.73518
FBgn0261625	CG42708	423.96	330.35	296.53	438.69	618.23	766.24	0.79267	6.41047	0.00063719	0.011266	1.73495
FBgn0034943	Fmo-1	166.83	180.58	138.98	246.63	286.9	313.01	0.79467	5.31107	4.8258e-05	0.001168	1.74046
FBgn0032200	CG5676	144.86	95.229	159.19	269.64	222.19	200.41	0.79633	5.02675	0.00045848	0.008451	1.73373
FBgn0031268	cold	150.16	107.42	155.16	229.49	213.65	274.51	0.79804	5.07606	0.0001462	0.0031218	1.73875
FBgn0015372	chrw	86.639	78.095	66.092	115.3	146.11	143.18	0.80071	4.25989	0.00025705	0.0050895	1.75279
FBgn0036551	CG17029	46.656	43.687	65.597	110.29	76.886	83.915	0.80709	3.70176	0.0021585	0.031016	1.73843
FBgn0259142	Snp	165.82	176.29	186.74	211.52	384.73	331.77	0.81184	5.4379	0.00038248	0.0071559	1.75479
FBgn0025454	Cyp6g1	3454.1	3905.9	3393.1	5852.9	5325.2	7725.2	0.81378	9.77068	4.1557e-05	0.0010283	1.75794
FBgn0032167	CG5853	144.6	181.64	145.99	217.52	311.47	302.15	0.81436	5.27911	0.00010011	0.0022434	1.76003
FBgn0259979	CG17337	677.75	691.73	678.62	1191.7	1123	1298.4	0.81874	7.38484	4.4822e-06	0.00013753	1.76412
FBgn0014877	Roe1	26.317	31.258	37.907	53.603	55.337	58.259	0.81982	3.02779	0.0033883	0.043767	1.7511
FBgn0063667	CG32335	302.71	309.01	285.42	492.87	529.27	567.75	0.82422	6.20329	6.408e-06	0.00018906	1.77218
FBgn0033821	CG10799	203.59	253.22	279.72	588.13	251.58	464.07	0.82442	5.91959	0.0023603	0.033433	1.77017
FBgn0030079	CG7267	704.32	667.22	655.03	1194.2	1009.5	1388.3	0.8251	7.37394	1.5834e-05	0.00042332	1.77245
FBgn0037852	Tpc1	209.15	220.83	196.41	326.75	374.96	411.75	0.82782	5.69166	1.0351e-05	0.00028914	1.77758
FBgn0003410	sina	243.73	256.37	160.57	295.89	438.11	448.29	0.83553	5.77405	0.00029363	0.0057414	1.78953
FBgn0036875	CG9449	1412.2	1342.2	1163.4	2179.4	1970	2850.6	0.83672	8.33032	3.336e-05	0.00084863	1.78672
FBgn0030799	CG4872	27.117	35.72	46.405	63.549	75.78	54.284	0.84109	3.22491	0.0037464	0.046993	1.77233
FBgn0027569	cert	304.45	320.15	297.21	453.79	584.78	615.15	0.84226	6.25343	1.4043e-05	0.00037847	1.79399
FBgn0039714	CG7816	197.82	148.66	198.41	271.3	339.8	368.31	0.84547	5.50268	3.4058e-05	0.00086199	1.79745
FBgn0052982	CG32982	165.17	150.63	135.75	236.72	282.76	295.24	0.84621	5.23815	1.0942e-05	0.00030141	1.80427
FBgn0039154	Npc2f	55.817	44.678	37.917	85.924	74.436	91.837	0.85059	3.57864	0.00058282	0.010434	1.82207
FBgn0038110	CG8031	213.56	238.59	189.33	298.42	431.41	430.51	0.85261	5.74178	3.5525e-05	0.0008968	1.80885
FBgn0028582	lqf	641.58	628.2	663.52	1022.1	1157.5	1312.2	0.85287	7.3236	4.2155e-06	0.00012975	1.80613
FBgn0050287	CG30287	38.556	70.964	43.719	85.731	84.547	107.65	0.85716	3.71553	0.0014327	0.022115	1.81369
FBgn0038291	CG3984	63.254	73.76	108.09	120.17	157.83	163.92	0.85896	4.36997	0.00059068	0.010537	1.80299
FBgn0259834	out	122.18	80.543	82.431	131.6	211.85	176.74	0.86001	4.59528	0.00034179	0.0065304	1.82424
FBgn0038460	CG18622	42.345	50.034	34.906	62.39	74.575	95.807	0.86089	3.46454	0.0011509	0.018451	1.82875
FBgn0015036	Cyp4ae1	43.403	43.361	23.607	71.112	49.888	81.98	0.86271	3.27339	0.0038668	0.047638	1.83907
FBgn0261049	Vps45	30.109	28.947	20.097	40.176	49.506	56.298	0.86441	2.81962	0.0032264	0.042223	1.84428
FBgn0259175	ome	52.009	52.487	59.036	96.561	89.558	111.59	0.86627	3.80979	0.00016554	0.0034463	1.82049
FBgn0027611	CG6206	2961.8	2743.6	3030.1	4850.2	4863.2	6213.5	0.86647	9.50483	3.7493e-06	0.00011757	1.82324
FBgn0086377	Syx7	306.19	335.72	297.33	442.94	595.64	675.39	0.86673	6.29604	2.507e-05	0.00064934	1.82485
FBgn0038256	CG7530	116.55	120.4	97.264	157.22	227.56	228.1	0.86932	4.82498	4.3771e-05	0.0010804	1.8338
FBgn0029766	CG15784	656.21	947.04	933.2	1231.7	1346	2062.7	0.87171	7.72619	0.0002403	0.0048118	1.82949
FBgn0041150	hoe1	107.22	66.067	69.099	118.48	173.13	155.02	0.87291	4.37478	0.00038442	0.0071787	1.84264
FBgn0052549	CG32549	1876.3	2133	1543.9	2559.6	3552.5	4097.6	0.87823	8.85956	6.948e-05	0.0016264	1.83853
FBgn0085799	CR41544	53.652	71.252	63.806	146.77	88.458	111.57	0.88041	4.01983	0.00052966	0.0096321	1.83773
FBgn0036975	CG5618	416.38	554.16	407.63	570.72	1022.2	948.88	0.88255	6.85641	0.00020182	0.0040989	1.84433
FBgn0030796	CG4829	91.876	85.911	77.715	110.02	171.29	191.58	0.88272	4.45274	0.00023512	0.0047271	1.85083
FBgn0036341	Syx13	340.47	411.57	387.42	592.59	740.79	772.14	0.88631	6.58507	3.9527e-06	0.00012317	1.84782
FBgn0032900	CG14401	182.67	182.99	184.12	321.13	321.97	375.22	0.88842	5.54337	1.2564e-06	4.4906e-05	1.85223
FBgn0030040	CG15347	42.07	66.732	60.551	108.26	97.158	107.63	0.89411	3.87311	0.00023792	0.0047737	1.84849
FBgn0035348	CG16758	2330.7	2731	2199.6	3786.3	4224.1	5546.1	0.90048	9.2605	9.164e-06	0.00025888	1.86695
FBgn0051370	CG31370	54.061	43.546	35.048	86.789	61.608	101.73	0.9013	3.55052	0.00090737	0.015207	1.88555
FBgn0033453	CG1667	128.31	98.256	81.347	165.67	172.56	240.96	0.90158	4.73217	9.0463e-05	0.0020456	1.88102
FBgn0046114	Gclm	107.44	132.71	140.44	199.49	214.52	296.25	0.90258	5.02575	3.7035e-05	0.00092328	1.86621
FBgn0038214	CG9616	558.55	603.55	589.42	1203.6	839.95	1231.3	0.90275	7.21384	7.3662e-06	0.00021416	1.86972
FBgn0037612	CG8112	145.44	172.86	173.39	313.06	253.77	351.53	0.90301	5.3917	6.0892e-06	0.00018235	1.86776
FBgn0086915	Mst77F	187.24	195.04	127.72	323.77	284.1	350.53	0.90354	5.44973	1.2765e-05	0.00034685	1.87922
FBgn0028985	Spn4	786.26	810.02	840.17	1393.1	1458.6	1711.1	0.9052	7.69022	7.9636e-07	2.9412e-05	1.87272
FBgn0034221	CG10764	59.761	89.01	74.273	144.59	138.37	137.24	0.91796	4.27815	3.8247e-05	0.00095112	1.88393
FBgn0033032	kune	113.12	99.336	91.164	184.06	199.71	193.52	0.9197	4.72285	1.5713e-06	5.5191e-05	1.90136
FBgn0052066	CG32066	64.41	66.91	62.558	110.44	130.12	128.36	0.92532	4.09004	1.4173e-05	0.00038094	1.90285
FBgn0031682	CG5828	78.315	86.029	118.8	149.94	171.02	214.29	0.92542	4.61796	5.9191e-05	0.001402	1.89038
FBgn0051102	CG31102	69.645	85.705	64.485	101.83	156.25	160.96	0.92649	4.26818	0.00016335	0.003422	1.90616
FBgn0037935	CG6834	82.981	84.743	74.676	119.26	140.73	202.46	0.92672	4.40641	0.00010963	0.0024402	1.9078
FBgn0034002	CG8079	96.244	87.109	93.51	157.5	168.5	201.45	0.92687	4.59358	3.478e-06	0.00011081	1.90509
FBgn0043783	CG32444	361.62	385.04	496.03	861.64	770.81	728.66	0.92859	6.73591	1.9228e-06	6.6119e-05	1.9
FBgn0031220	CG4822	874.73	887.93	641.35	1220.2	1568.6	1793.1	0.92934	7.68746	1.286e-05	0.00034848	1.90594
FBgn0030662	CG9220	350.24	459.31	320.26	642.26	651.52	865.96	0.93338	6.60468	8.6477e-06	0.0002478	1.9116
FBgn0250848	26-29-p	1091.5	1127	1410.8	2362.1	1971.7	2595.8	0.93363	8.28231	2.3464e-06	7.7222e-05	1.90935
FBgn0028939	nimC2	2763.2	3032.3	2544	4768.4	5067.1	6106.9	0.93463	9.48243	6.8175e-07	2.5462e-05	1.91167
FBgn0038716	CG7342	826	826.78	875.77	1551.7	1412.2	1898.7	0.94345	7.76869	6.7451e-07	2.5382e-05	1.92308
FBgn0041194	Prat2	2728.6	3388.2	2940.1	5153.3	5523.4	6745.7	0.94385	9.60733	9.5234e-07	3.4787e-05	1.92366
FBgn0029093	cathD	8660.2	9355.1	8335.9	16275	16217	18345	0.94799	11.1503	1.282e-07	5.417e-06	1.92921
FBgn0051323	CG31323	53.759	64.565	52.374	134.26	89.385	106.63	0.95024	3.9273	9.046e-05	0.0020456	1.93485
FBgn0036549	CG10516	45.85	45.785	50.244	82.382	95.703	95.781	0.95035	3.66604	5.0406e-05	0.0012083	1.93028
FBgn0030158	CG9686	65.538	41.547	56.317	92.227	136.46	87.85	0.95096	3.86764	0.00037077	0.006963	1.93717
FBgn0086676	spin	244.55	240.93	202.71	363.76	408.29	567.79	0.95809	5.91118	6.9862e-06	0.0002037	1.9469
FBgn0033717	CG8839	927.62	852.46	853.97	1591.3	1657.4	1871.1	0.95826	7.83766	1.2301e-07	5.2198e-06	1.9437
FBgn0030048	CG12112	23.074	17.912	16.733	42.279	35.112	36.527	0.9645	2.45618	0.0018982	0.027878	1.97367
FBgn0033310	rgr	337.1	360.28	321.11	544.63	683.69	765.24	0.96775	6.47828	7.715e-07	2.86e-05	1.95737
FBgn0031805	CG9505	234.14	182	180.29	313.35	381.6	475.95	0.96908	5.71441	5.235e-06	0.00015867	1.96318
FBgn0051636	CG31636	154.19	239.4	155.38	265.31	429.92	382.12	0.97154	5.59583	5.1365e-05	0.0012254	1.96249
FBgn0030575	CG5321	217.99	243.04	186.49	421.16	410.92	446.3	0.97807	5.8376	1.93e-07	8.0528e-06	1.97427
FBgn0069056	CG33226	27.851	62.072	45.977	63.024	106.9	97.762	0.98056	3.62443	0.0016619	0.024847	1.96973
FBgn0262587	CG43124	227.01	149.88	224.94	555.22	288.78	344.57	0.98175	5.7335	0.0001556	0.0032874	1.97493
FBgn0031702	fusl	610.46	749.66	764.12	1356.9	1176.5	1664.7	0.98329	7.54391	1.0765e-06	3.9037e-05	1.97628
FBgn0017430	Nelf-E	18.555	16.779	17.845	30.347	36.961	38.516	0.98527	2.35191	0.0016346	0.024511	1.98996
FBgn0032253	CG5322	357.41	342.6	375.36	567.7	734.87	831.39	0.98858	6.56938	5.993e-07	2.2637e-05	1.9844
FBgn0037850	CG14695	17.459	32.057	19.758	45.391	38.33	54.326	0.991	2.70831	0.0022141	0.031678	1.99277
FBgn0000566	Eip55E	2718.1	3109.3	2756	5316.9	4873.1	6881	0.99184	9.56171	4.2744e-07	1.6455e-05	1.98884
FBgn0000071	Ama	2582.4	2340.8	2146.2	4664.6	4159.4	5251.8	0.99321	9.28304	1.0274e-07	4.4161e-06	1.99109
FBgn0040503	CG7763	355.58	328.21	425.11	786.42	639.7	781.02	0.99454	6.61647	2.719e-07	1.0889e-05	1.99039
FBgn0261794	kcc	100.54	121.4	92.737	169.69	246.15	213.27	0.9962	4.82105	2.7778e-06	8.9935e-05	1.99922
FBgn0003475	spir	101.49	112.53	86.888	166.42	183.5	254.79	1.00094	4.76198	6.3017e-06	0.00018702	2.00962
FBgn0085759	CR40640	303.51	390.12	255.19	686.52	501.96	712.9	1.001	6.39916	4.8141e-06	0.00014681	2.00394
FBgn0038346	CG14872	71.695	61.365	48.482	88.621	141.22	137.26	1.00523	4.05489	8.3673e-05	0.0019181	2.02213
FBgn0036893	CG9376	15.016	12.36	16.118	33.209	28.477	25.659	1.00793	2.09566	0.0032018	0.042003	2.00821
FBgn0040099	lectin-28C	744.85	611.71	865.9	1776.2	1192.3	1503.8	1.00935	7.62638	2.4114e-06	7.9099e-05	2.01232
FBgn0052039	CG32039	46.034	37.998	36.081	88.528	85.638	70.083	1.01538	3.48484	4.537e-05	0.0011171	2.03349
FBgn0033304	Cyp6a13	121.55	173.75	136.93	263.21	276.68	334.74	1.01686	5.28388	9.0324e-07	3.3236e-05	2.02353
FBgn0032036	CG13384	213.5	236.44	215.51	386.15	513.67	454.19	1.0244	5.90566	1.0673e-07	4.5484e-06	2.03473
FBgn0000083	AnnIX	1268.9	1301.1	1667.6	2760.8	2595	3266.2	1.02534	8.56634	2.2625e-07	9.2468e-06	2.03464
FBgn0032322	CG16743	234.98	219.69	158.8	401.27	335.91	520.39	1.03071	5.79615	3.6574e-06	0.00011578	2.04993
FBgn0001145	Gs2	128.68	119.63	186.77	219.07	349.35	318.93	1.03198	5.30102	1.6269e-05	0.00043262	2.03951
FBgn0031381	Npc2a	978.56	1184.7	1045.5	2185.3	1942.4	2440.8	1.03353	8.17159	4.2451e-08	1.9508e-06	2.04705
FBgn0040491	Buffy	18.622	15.648	13.746	24.402	44.922	30.599	1.04281	2.2595	0.0035682	0.04555	2.08104
FBgn0050090	CG30090	717.02	602.42	413.21	1186.8	1160.8	1230.3	1.04386	7.29313	1.2798e-06	4.5417e-05	2.06499
FBgn0030876	CG6762	1955.7	2147.5	1653.6	3292.4	3825.7	4796.7	1.04905	9.02437	3.8244e-07	1.4839e-05	2.06969
FBgn0033913	CG8468	242.7	223.26	253.56	444.05	545.44	503.56	1.05363	6.03649	1.9741e-08	9.5098e-07	2.07506
FBgn0085261	CG34232	48.792	29.252	38.686	63.161	96.807	83.93	1.05473	3.46987	0.00014125	0.0030292	2.08942
FBgn0028675	Sur	17.81	13.415	9.5614	31.486	26.736	28.631	1.05847	2.06735	0.0017359	0.025906	2.12946
FBgn0029831	CG5966	1713.1	1402.7	1698.2	2810.1	3384.6	3839.9	1.05961	8.77355	8.6121e-08	3.7178e-06	2.08446
FBgn0031011	CG8034	162.33	178.43	162.08	304.43	416.48	328.78	1.0614	5.53006	6.4515e-08	2.8341e-06	2.08752
FBgn0051098	CG31098	45.346	25.873	28.771	71.877	79.913	59.22	1.06329	3.26696	0.00016621	0.0034529	2.11031
FBgn0032713	CG17323	620.45	600.27	591.12	1109.7	1302.7	1400.1	1.07269	7.37573	6.3556e-09	3.2687e-07	2.10421
FBgn0039099	CG10157	298.4	346.6	190.57	587.2	518.1	657.61	1.07369	6.26674	2.8141e-06	9.0816e-05	2.10983
FBgn0259147	CG42262	78.344	34.902	34.006	84.671	119.38	109.6	1.07934	3.81219	0.0004715	0.0086589	2.13003
FBgn0037853	CG14696	42.741	30.141	16.311	56.755	68.884	68.134	1.09424	3.13768	0.0003425	0.0065304	2.17251
FBgn0010222	Nmdmc	192.82	298.85	320.96	461.99	635.2	640.82	1.09919	6.24031	2.1073e-06	7.0517e-05	2.13875
FBgn0036118	blos2	13.977	16.777	22.999	29.389	37.721	47.42	1.10087	2.42676	0.0017707	0.026276	2.13067
FBgn0026084	cib	1473.2	1377.8	1006.7	2118.6	3616	2579	1.10723	8.48713	2.628e-06	8.5362e-05	2.15507
FBgn0038533	CG7523	75.865	82.485	73.066	181.88	149.07	170.82	1.11391	4.46446	5.5052e-08	2.4729e-06	2.16826
FBgn0029507	Tsp42Ed	266.5	243.38	296.3	568.96	515.59	666.5	1.11984	6.24396	9.6287e-09	4.8493e-07	2.17203
FBgn0032668	CG17681	12.35	10.133	14.52	20.341	28.587	31.611	1.12019	1.95437	0.0029953	0.039879	2.17655
FBgn0039882	CG11576	123.31	192.56	125.62	289.64	306.9	365.35	1.12173	5.38596	3.0276e-07	1.2076e-05	2.17874
FBgn0033307	CG14752	1677.3	1136	1166.4	2080.5	3365.7	3223.8	1.12287	8.54263	2.1259e-06	7.0903e-05	2.17856
FBgn0261932	CG42798	39.285	18.085	18.687	42.534	56.198	69.145	1.12314	2.93283	0.00088738	0.014948	2.20725
FBgn0029898	CG14439	39.846	31.341	32.911	71.714	89.198	69.101	1.13584	3.36605	1.2067e-05	0.00032878	2.20958
FBgn0085282	CG34253	212.78	208.58	175.97	412.79	431.94	471.97	1.13618	5.82922	1.248e-09	7.2353e-08	2.20431
FBgn0004242	Syt1	1840.1	2009.2	1625.2	3619.6	3624.3	4805.5	1.13783	9.01231	1.0957e-08	5.4633e-07	2.201
FBgn0033981	Cyp6a21	43.909	49.197	69.898	107.14	104.61	145.18	1.13943	3.98018	1.0684e-05	0.00029512	2.1897
FBgn0029823	CG3011	3765.4	5552.5	4534.6	9092	9956.6	11528	1.14229	10.3536	2.3203e-08	1.1018e-06	2.2073
FBgn0037683	CG18473	281.64	275.51	228.04	418.04	522.34	798.85	1.14532	6.22515	2.2481e-06	7.4477e-05	2.21504
FBgn0033440	CG10459	44.065	66.463	26.886	71.245	110.02	126.42	1.1535	3.76359	0.00030146	0.0058599	2.23911
FBgn0030334	Karl	127.8	135.09	166.79	402.86	248.63	306.07	1.15972	5.37005	2.3346e-07	9.3875e-06	2.22854
FBgn0013278	Hsp70Bb	669.02	703.85	543.01	1190.5	1538.6	1566	1.16339	7.51852	5.3335e-09	2.7701e-07	2.24184
FBgn0025682	scf	1792.6	1798.3	1242.9	3244.7	3575	4047.2	1.16801	8.854	1.9343e-08	9.3637e-07	2.24811
FBgn0030955	CG6891	1516.2	1629.9	1356.3	3244.8	3395.5	3497.3	1.17054	8.75323	1.5729e-10	1.0598e-08	2.2516
FBgn0000565	Eip71CD	1001.6	871.6	1140.8	1804.9	2444.5	2612.6	1.18715	8.18617	9.9771e-09	4.9996e-07	2.27671
FBgn0034443	cer	1239.1	1178.2	1161.3	2603.1	2885.7	2666.9	1.18811	8.43451	3.1011e-11	2.2088e-09	2.27902
FBgn0037345	rev7	6.9476	11.089	10.273	17.112	24.463	22.713	1.18904	1.64921	0.003572	0.04555	2.27089
FBgn0038466	CG8907	18.253	35.463	29.492	52.552	67.208	69.128	1.19058	3.08214	8.0801e-05	0.0018608	2.27007
FBgn0026563	CG1979	13.317	13.315	6.6563	22.966	30.382	24.678	1.19366	1.89293	0.0013484	0.021043	2.34395
FBgn0026061	Mipp1	55.865	27.161	51.38	72.064	131.37	108.62	1.21222	3.76842	8.8136e-05	0.0020096	2.32173
FBgn0062412	Ctr1B	446.43	544.25	448.88	1033.8	1067.7	1245.1	1.21654	7.14389	1.4685e-10	9.9619e-09	2.32474
FBgn0028992	sds22	124.59	91.736	118.47	256.8	265.94	258.69	1.22138	5.06077	4.5104e-10	2.8467e-08	2.33405
FBgn0037972	CG10005	44.375	28.087	32.959	80.028	98.479	70.081	1.22745	3.44759	5.956e-06	0.0001789	2.35805
FBgn0262366	CG43064	91.96	74.853	74.664	148.13	182.74	247.88	1.25397	4.62308	8.452e-08	3.6694e-06	2.39671
FBgn0010040	GstD4	15.635	30.988	23.736	39.973	53.592	76.072	1.2704	2.90992	0.00026543	0.0052309	2.41102
FBgn0039487	gb	74.066	70.411	88.38	161.56	197.23	201.43	1.27084	4.57639	1.0667e-09	6.3317e-08	2.40585
FBgn0085354	CG34325	34.556	23.611	31.074	52.333	92.751	74.053	1.2902	3.25647	1.8329e-05	0.00048227	2.45556
FBgn0036765	CG7408	21.173	20.126	22.172	65.7	41.626	48.372	1.29345	2.79053	3.5613e-05	0.0008968	2.45306
FBgn0033196	CG1358	51.18	58.967	42.343	127.2	106.21	144.18	1.2987	4.00928	5.91e-08	2.6193e-06	2.47616
FBgn0053099	CG33099	280.65	286.69	263.17	655.64	638.16	759.3	1.30419	6.41656	2.6749e-12	2.1686e-10	2.4721
FBgn0036993	CG5910	48.668	26.041	55.252	93.047	107.36	120.48	1.30537	3.78301	2.8306e-06	9.1053e-05	2.4691
FBgn0031182	Cyp6t1	49.331	50.275	60.292	125.42	113.8	156.03	1.30902	4.07391	2.4626e-08	1.1583e-06	2.47189
FBgn0032955	CG2201	107.65	111.54	105.6	197.6	337.79	270.54	1.30971	5.0794	6.3591e-09	3.2687e-07	2.48139
FBgn0051955	CG31955	13.114	14.571	21.486	33.599	41.988	45.432	1.31236	2.44725	0.00012425	0.0027232	2.46119
FBgn0025456	CREG	1384.8	1302	1192.9	2789.5	3185.8	3680.9	1.31498	8.64029	7.7544e-12	5.9482e-10	2.4889
FBgn0032770	CG13086	53.854	50.264	53.415	94.386	141.06	158.01	1.31713	4.06317	1.9902e-07	8.2691e-06	2.49761
FBgn0029002	miple2	264.96	224.33	212.94	620.37	535.78	613.16	1.32967	6.19564	4.1161e-12	3.2576e-10	2.51956
FBgn0001224	Hsp23	9674.1	12805	8936.4	24570	28142	26469	1.33367	11.669	2.2907e-11	1.6796e-09	2.52044
FBgn0010039	GstD3	145.32	232.73	162.48	350.43	430.16	589.51	1.34106	5.8271	4.1076e-08	1.9052e-06	2.53473
FBgn0015572	alpha-Est4	88.97	80.597	133.25	251.02	246.52	268.57	1.34768	5.00018	1.0414e-09	6.2187e-08	2.52994
FBgn0039593	CG9989	670.81	755.01	472.41	1645.2	1498.8	1738.8	1.36138	7.64504	9.0892e-11	6.2508e-09	2.57229
FBgn0034199	Gbp	173.94	162.91	153.35	331.48	401.66	535.2	1.36833	5.70857	2.4489e-10	1.5961e-08	2.58739
FBgn0029091	CS-2	361.22	319.06	250.73	652.77	853.17	942.96	1.39196	6.64435	6.6968e-11	4.6375e-09	2.63037
FBgn0034364	CG5493	36.118	40.127	38.607	76.309	82.692	145.21	1.40173	3.68033	2.5155e-06	8.2244e-05	2.64872
FBgn0001967	nimC3	50.865	81.23	75.288	166.6	203.2	183.65	1.42435	4.51918	2.7273e-10	1.758e-08	2.66873
FBgn0032483	CG15482	8.9821	3.4581	4.7002	20.911	15.016	12.821	1.46342	1.24203	0.0028042	0.038359	2.84404
FBgn0031470	CG18557	49.098	87.755	64.084	185.83	182.83	185.62	1.4674	4.50899	1.7798e-10	1.1911e-08	2.75848
FBgn0036620	CG4842	50.019	69.112	77.767	146.57	162.5	234.06	1.46941	4.47947	7.4751e-09	3.8031e-07	2.75843
FBgn0032614	CG13284	6.2031	6.6493	3.3663	10.442	22.183	13.815	1.47463	1.1786	0.0037448	0.046993	2.86336
FBgn0034467	CG15128	5.2538	8.7914	3.4131	15.602	20.302	14.801	1.50305	1.28206	0.0012293	0.019519	2.90435
FBgn0038660	CG14291	225.17	175.41	220.84	518.35	555.99	689.21	1.50399	6.14495	1.9536e-13	1.7873e-11	2.83794
FBgn0035968	Slc45-1	890.66	825.57	675.19	2085.2	1886.9	2824.9	1.50593	8.08237	1.7077e-12	1.3958e-10	2.84224
FBgn0002577	m	10.754	2.4192	8.7069	20.608	20.95	21.723	1.5071	1.55463	0.00069831	0.012195	2.89217
FBgn0044812	TotC	56.69	221.82	79.052	220.51	316.04	492.78	1.5242	5.37028	0.00023098	0.0046627	2.87875
FBgn0037513	pyd3	147.47	128.42	138.12	339.89	389.13	471.99	1.53385	5.58776	2.5613e-14	2.6332e-12	2.90092
FBgn0031741	CG11034	60.472	124.43	84.955	307.67	209.27	263.63	1.53395	4.9763	2.901e-09	1.6071e-07	2.89253
FBgn0052407	CG32407	21.054	24.56	29.162	51.498	83.297	82.958	1.54682	3.18632	4.3068e-07	1.6455e-05	2.91207
FBgn0027556	CG4928	113.8	127.08	110.25	287.01	389.51	351.51	1.54775	5.36305	1.6671e-14	1.7317e-12	2.92778
FBgn0038865	CG10824	155.34	169.43	132.95	463.4	419.25	461.1	1.54934	5.74398	3.0274e-16	3.7737e-14	2.93575
FBgn0014427	CG11899	555.94	668.02	486.56	1373.8	1683.5	1961.9	1.552	7.63428	1.5512e-13	1.4457e-11	2.93431
FBgn0000008	a	152.86	111.83	142.29	318.3	476.05	401.86	1.55388	5.5776	9.0497e-13	7.7132e-11	2.93924
FBgn0051337	CG31337	32.617	20.419	48.749	108.38	93.834	94.78	1.55457	3.61618	1.0487e-07	4.4883e-06	2.91786
FBgn0033439	CG1773	398.85	437.25	387.9	1142.1	1239.8	1239.1	1.56411	7.16195	9.1024e-18	1.2784e-15	2.95833
FBgn0033321	CG8738	73.904	96.953	96.099	245.12	241.39	302.16	1.56725	4.98308	7.1481e-14	6.9205e-12	2.95431
FBgn0030594	CG9509	1472.7	1853	1759.2	5062.7	4946.4	5083.9	1.56986	9.21578	6.6411e-17	8.6006e-15	2.9682
FBgn0025697	santa-maria	109.42	103.84	115.54	218.09	478.4	282.36	1.57356	5.28766	5.0759e-09	2.664e-07	2.97704
FBgn0039774	CDase	109.43	102.73	114.08	314.57	309.4	350.53	1.57873	5.27988	1.3146e-16	1.6806e-14	2.98706
FBgn0039028	CG13840	139.87	104.92	75.839	235.57	411.67	316.94	1.5809	5.26196	1.2127e-09	7.072e-08	3.00715
FBgn0032670	CG5783	3.5111	5.4936	1.827	12.441	9.9671	11.849	1.60036	0.79456	0.0022918	0.032606	3.16267
FBgn0001187	Hex-C	13.255	9.0689	15.847	32.802	38.573	44.447	1.60037	2.3199	4.6293e-06	0.0001416	3.0343
FBgn0037387	CG1213	17.889	9.0609	9.397	25.099	59.524	30.586	1.64147	2.3041	0.00013708	0.0029589	3.16971
FBgn0040319	Gclc	119.09	119.42	128.9	355.71	421.23	405.81	1.68782	5.53023	5.9513e-19	1.0412e-16	3.21916
FBgn0260474	CG30002	53.811	54.675	54.937	178.41	180.38	169.82	1.69298	4.38745	7.361e-16	9.0622e-14	3.23461
FBgn0053462	CG33462	29.224	214.55	39.839	387.92	230.93	325.84	1.73328	5.19958	0.0011389	0.018379	3.33091
FBgn0031471	CG3117	188.84	201.86	180.03	518.18	687.99	714.87	1.74928	6.20823	1.0241e-17	1.3989e-15	3.36593
FBgn0083972	CG34136	292.39	252.14	203.14	778.6	800.08	961.72	1.75988	6.60543	7.3662e-18	1.0494e-15	3.39776
FBgn0051344	CG31344	62.518	79.062	68.446	237.01	220.44	254.75	1.7621	4.79276	2.4001e-18	3.799e-16	3.39101
FBgn0003651	svp	516.49	483.02	373.95	1356.6	1671.1	1660.8	1.76893	7.48413	2.1144e-18	3.4566e-16	3.41364
FBgn0030234	CG15211	21.907	26.783	32.031	84.022	69.141	128.41	1.80613	3.48298	6.5736e-09	3.3616e-07	3.48822
FBgn0032824	CG13962	4665.1	4466.2	4107.4	15334	12608	18587	1.81325	10.7814	3.7409e-19	6.7826e-17	3.51462
FBgn0043577	PGRP-SB2	61.994	245.09	70.649	105.04	945.77	279.36	1.81393	5.66889	0.0038249	0.047401	3.52146
FBgn0038095	Cyp304a1	35.004	38.157	73.323	156.72	170.26	184.65	1.81859	4.31834	2.9104e-11	2.1031e-09	3.49274
FBgn0053301	CG33301	17.524	22.278	23.452	94.623	48.03	85.918	1.85482	3.18721	2.2693e-08	1.0828e-06	3.61354
FBgn0036940	obst-J	194.96	127.21	57.749	388.61	573.5	415.66	1.85521	5.70927	1.3783e-08	6.8041e-07	3.62648
FBgn0085235	CG34206	98.218	36.328	112.33	230.68	383.96	292.25	1.87577	5.11137	9.3163e-09	4.7158e-07	3.67346
FBgn0037433	CG17919	85.564	87.043	90.439	316.24	348.26	311.01	1.89178	5.21177	1.2791e-22	3.1887e-20	3.70851
FBgn0053329	Sp212	139.62	187.78	40.327	376.14	534.68	477.89	1.91522	5.70866	3.7558e-07	1.463e-05	3.77647
FBgn0033635	CG7777	158.75	126.44	223.63	772.75	528.88	615.12	1.91647	6.17076	2.6177e-15	3.1075e-13	3.76705
FBgn0035112	CG13877	6.3203	1.221	3.1161	14.901	9.8246	17.788	1.91964	0.98854	0.00039554	0.0073726	3.98912
FBgn0002862	Mst87F	14.277	4.6857	13.011	25.036	45.449	52.362	1.92746	2.33093	5.4375e-06	0.00016431	3.84213
FBgn0033518	Prx2540-2	23.778	21.321	30.511	73.814	105.8	118.51	1.98237	3.52873	1.0825e-11	8.056e-10	3.94292
FBgn0050052	Obp49a	96.672	238.68	67.961	552.58	730.64	330.7	1.99903	5.90745	3.358e-07	1.3248e-05	4.00166
FBgn0051326	CG31326	54.845	79.608	8.4662	177.38	238.76	157.95	2.00039	4.44045	1.5953e-05	0.00042534	4.01689
FBgn0053126	NLaz	60.733	47.231	101.5	244.99	327.53	263.62	2.00529	4.97297	2.7814e-14	2.8302e-12	3.99181
FBgn0037592	CG11737	462.62	415.06	371.96	1283.6	1645.7	2191	2.03324	7.55552	3.8372e-19	6.833e-17	4.09742
FBgn0043575	PGRP-SC2	970.21	782.2	700.36	2379.5	3577.7	4097.6	2.03455	8.52671	1.1034e-17	1.4869e-15	4.09937
FBgn0039648	CG14515	8.0711	4.517	3.3631	8.456	49.217	9.8327	2.0431	1.54468	0.0034054	0.043932	4.23201
FBgn0014380	RhoL	63.374	59.359	96.299	268.83	342.36	356.46	2.15218	5.15226	5.9442e-20	1.1623e-17	4.41785
FBgn0004431	LysX	10.448	15.561	16.029	69.556	88.793	29.559	2.15825	2.8721	3.9031e-07	1.5086e-05	4.46996
FBgn0033520	Prx2540-1	7.8076	13.292	11.765	36.758	54.697	55.307	2.16079	2.53348	3.4151e-09	1.8712e-07	4.46566
FBgn0011554	etaTry	6.9189	14.322	9.1054	53.053	58.235	29.58	2.20991	2.47624	5.8274e-08	2.5942e-06	4.64202
FBgn0085222	CG34193	6.8861	10.086	16.82	14.633	121.11	37.478	2.33114	2.72783	0.00020751	0.0042058	5.12608
FBgn0041337	Cyp309a2	4.3255	5.6054	8.4673	33.133	20.57	38.532	2.33145	1.89713	3.2612e-07	1.2957e-05	5.01326
FBgn0051454	CG31454	4.4003	3.405	5.7311	15.302	26.126	28.652	2.35495	1.54177	2.0365e-06	6.9074e-05	5.17715
FBgn0039817	CG15553	44.428	23.698	32.821	174.21	137.94	219.23	2.38306	4.26314	9.9495e-18	1.378e-15	5.26395
FBgn0031412	CG16995	4.4221	4.4534	3.1727	27.545	18.272	19.738	2.3973	1.45712	3.7437e-07	1.463e-05	5.44106
FBgn0041579	AttC	48.24	70.184	74.92	376.04	220.7	419.67	2.398	5.1799	2.3992e-18	3.799e-16	5.257
FBgn0004240	Dpt	20.525	12.376	10.99	94.58	24.143	114.6	2.39968	3.11817	9.1088e-07	3.3394e-05	5.31596
FBgn0085757	CR40621	2.3667	20.706	7.8289	88.557	6.5257	78.049	2.46318	2.70346	0.0012232	0.019455	5.60268
FBgn0032693	Cyp310a1	105.17	82.733	95.03	458.87	582.38	534.17	2.4734	5.79072	5.7251e-33	3.806e-30	5.56817
FBgn0033830	CG10814	23.367	5.8487	10.857	85.266	77.163	68.112	2.48566	3.09232	9.1819e-13	7.7595e-11	5.75307
FBgn0035791	CG8539	16.936	6.9141	14.613	69.207	87.518	69.103	2.5376	3.06059	4.9257e-15	5.5818e-13	5.87129
FBgn0031800	CG9497	14.145	11.246	14.678	55.529	98.465	96.784	2.63671	3.18945	1.3617e-14	1.4294e-12	6.25865
FBgn0038846	CG5697	62.15	43.59	32.435	109.38	500.87	258.67	2.6514	4.91975	8.4649e-10	5.1471e-08	6.28855
FBgn0003046	Pcp	1646	1689	1337.3	10943	8397.7	11424	2.71854	10.0278	2.1512e-38	1.7876e-35	6.58449
FBgn0052557	CG32557	515.59	671.97	189.11	2025	3710.5	3659.2	2.77063	8.31166	3.7081e-13	3.2723e-11	6.82422
FBgn0030412	tomosyn	369.87	364.77	308.14	2025.5	2614.8	2502	2.77388	7.91671	2.933e-42	3.2497e-39	6.84929
FBgn0041581	AttB	182	54.159	80.055	506.33	547.15	1162.2	2.81091	6.23118	7.3941e-12	5.7158e-10	7.0069
FBgn0052271	CG32271	1.6174	4.4918	9.4719	31.172	36.924	40.494	2.84527	2.05465	4.4004e-10	2.8129e-08	6.96934
FBgn0003996	w	530.63	470.82	393.06	3138.2	3192.4	3844.8	2.865	8.41479	3.0079e-43	4.2849e-40	7.29676
FBgn0023129	aay	145.55	149.53	160.05	760.67	1098.8	1510.7	2.88818	6.82386	1.9152e-29	8.6811e-27	7.40485
FBgn0263076	Klp54D	1.6772	5.4738	3.0666	24.673	31.233	23.686	2.94393	1.64534	7.0135e-10	4.2907e-08	7.7897
FBgn0261566	CG42680	0.82439	1.1578	4.0119	16.583	11.534	17.782	2.94909	0.97023	2.0564e-06	6.9512e-05	7.65738
FBgn0034434	Rgk1	7.8845	6.7933	12.722	52.231	106.34	77.999	3.11343	3.0628	2.8593e-15	3.3545e-13	8.634
FBgn0050088	CG30088	13.355	11.144	6.5776	93.879	130.43	97.735	3.32739	3.46134	2.887e-25	8.724e-23	10.3629
FBgn0038784	CG4362	81.266	62.707	85.533	836.64	821.16	825.44	3.43607	6.3326	1.5133e-57	3.7727e-54	10.8199
FBgn0029770	CG4151	3.4224	10.886	2.0315	36.43	114.68	41.425	3.50832	2.75281	5.6532e-10	3.4798e-08	11.7831
FBgn0028396	TotA	5900.4	6651.8	6374	78744	63023	79371	3.5465	12.7871	5.5772e-68	5.5616e-64	11.6842
FBgn0262150	CG42876	6.031	16.407	5.1116	105.52	129.41	111.57	3.62494	3.54207	1.0991e-27	4.3842e-25	12.5773
FBgn0037727	CG8358	7.9053	9.9849	7.6175	63.595	134.65	132.34	3.6757	3.47186	4.256e-21	9.2262e-19	12.9602
FBgn0085265	CG34236	4.518	1.1845	1.6841	30.369	45.728	27.625	3.69512	1.92499	2.1255e-13	1.9269e-11	14.0419
FBgn0037788	CG3940	14.785	24.439	24.772	285.36	311.84	424.61	4.00802	5.03019	8.1987e-48	1.6352e-44	15.9668
FBgn0012042	AttA	331.22	56.561	55.175	1605.5	1482.2	4080.9	4.0275	7.81138	1.2225e-10	8.3496e-09	16.1835
FBgn0035621	CG10591	6.2466	4.4866	3.2715	91.79	69.259	97.768	4.13977	3.1109	5.832e-28	2.4232e-25	18.4807
FBgn0029659	CG16782	1.7499	2.2223	1.5803	28.578	32.549	49.406	4.22618	1.97527	6.9539e-15	7.6202e-13	19.9069
FBgn0041234	Gr59f	2.6628	2.2403	1.6342	36.851	48.743	51.357	4.29088	2.25423	1.0563e-19	2.0257e-17	20.9492
FBgn0010388	Dro	59.903	24.796	15.156	606.67	432.81	1075.3	4.39623	6.04093	2.9163e-24	8.0782e-22	21.1785
FBgn0050181	CG30181	1.6617	6.5509	3.1229	98.132	86.901	130.37	4.77483	3.35764	2.6526e-32	1.556e-29	27.8244
FBgn0000241	bw	44.446	113.32	92.938	2470.8	2427.2	3371.9	5.04684	7.97528	6.211e-58	2.0646e-54	32.9867
FBgn0014865	Mtk	85.216	49.318	47.108	2668.3	945.82	2845.6	5.14958	7.61637	7.3761e-36	5.2539e-33	35.5629
